# Supplementary material for: Synthesis of novel C-nucleoside analogues bearing an anomeric cyano and a 1,2,3-triazole nucleobase as potential antiviral agents
Source: Royal Society of Chemistry journal article supplement (doi:10.1039/d1ob02451e), 2022-01-01

## Synthesis of novel C-nucleoside analogues, bearing an anomeric cyano and a 1,2,3-triazole nucleobase, as potential antiviral agents

Pierre Sierocki<sup>a</sup>, Krystal Gaillard<sup>a</sup>, Ruben Arturo Arellano Reyes<sup>a</sup>, Chloé Donnart<sup>a</sup>, Emilie Lambert<sup>b</sup>, Sandrine Grosse<sup>c</sup>, Laurence Arzel<sup>a</sup>, Arnaud Tessier<sup>a</sup>, Jérôme Guillemont<sup>b,d</sup>, Monique Mathé-Allainmat<sup>a\*</sup> and Jacques Lebreton<sup>a\*</sup>

<sup>a</sup> Université de Nantes, CNRS, Laboratoire CEISAM–UMR 6230, Faculté des Sciences et des Techniques, 2 rue de la Houssinière, BP 92208, 44322 Nantes Cedex 3, France.

<sup>b</sup> Janssen-Cilag, Campus de Maigremont BP615, F-27106 Val de Reuil, Cedex, France

<sup>c</sup> Janssen Research & Development, Turnhoutseweg 30, 2340 Beerse, Belgium

<sup>d</sup> Present address : NovAliX on-site Janssen-Cilag. Centre de recherche Pharma, Campus de Maigremont. BP615, 27106 Val-de-Reuil Cedex ,France

### Table of contents

|                                                                                                          |                |
|----------------------------------------------------------------------------------------------------------|----------------|
| Synthesis and XRD for 1'- $\alpha$ -carbamoyl compound <b>5'b</b>                                        | <b>S2-S3</b>   |
| <sup>1</sup> H and <sup>13</sup> C NMR spectra of precursors <b>6, 8-9, 11, 14</b>                       | <b>S4-S15</b>  |
| <sup>1</sup> H, <sup>13</sup> C and <sup>19</sup> F NMR and NOESY spectra of compounds <b>12-13</b>      | <b>S16-S36</b> |
| <sup>1</sup> H, <sup>13</sup> C and <sup>19</sup> F NMR spectra of final ribofuranose compounds <b>5</b> | <b>S37-S46</b> |

## Synthesis and X-ray crystallographic data for carbamoyl analogue of **5b**, compound **5'b**.

Following a two-steps procedure close to that described for compound **5b**, starting from **12b**, an hydrolysed form of **5b**, the  $\alpha$ -carbamoyl compound **5'b** was isolated which DRX data could so confirmed the stereoselectivity of the cyanation step giving  $\alpha$ -CN anomer.

*(2S,3R,4S,5R)-3,4-Dihydroxy-5-(hydroxymethyl)-2-(5-iodo-2H-1,2,3-triazol-4-yl)tetrahydrofuran-2-carboxamide (5'b)*

NaOH (2.7 mL of a 1 M aqueous solution, 4.40 mmol, 2 eq) was added to a stirring solution of **12b** (0.1 g, 1.36 mmol, 1 eq) in MeOH (5.5 mL, 0.25 M) at 0°C and the resulting mixture was stirred 1h at RT. It was neutralized with a 1 M HCl aqueous solution and extracted with DCM. The combined organic layers were dried over Na<sub>2</sub>SO<sub>4</sub>, filtered and concentrated under reduced pressure to give the expected *N*-triazole deprotected intermediate as a mixture of tautomers : HRMS (ESI<sup>+</sup>): calcd for [M+Na]<sup>+</sup> C<sub>29</sub>H<sub>27</sub>N<sub>4</sub>O<sub>4</sub>NaI = 368.9696; found 368.9695 . This latter was dissolved in dry DCM (5.4 mL, 0.1 M) and the resulting solution cooled to 0°C. BCl<sub>3</sub> (3.38 mL of a 1 M solution in DCM, 3.38 mmol, 5 eq) was added and the reaction mixture was stirred for 2h at this temperature. It was then quenched with cold MeOH and warmed to RT. The resulting mixture was kept stirring for 30 additional min. Volatiles were removed under reduced pressure and the obtained residue was dissolved in MeOH. It was evaporated to dryness again, and the procedure was repeated three times. Finally the obtained residue was purified by flash column chromatography on silica gel [DCM/MeOH, 8:2] to afford **5b** and **5'b** (130 mg, 0.35 mmol, 26% yield). <sup>1</sup>H NMR (300 MHz, DMSO-*d*<sub>6</sub>, 298 K):  $\delta$  (ppm) 14.9 (br, 1H, NH), 7.46 (d,  $J_{\text{gem}} = 1.9$ , 1H, CONH<sub>2</sub>), 7.25 (d,  $J_{\text{gem}} = 1.9$ , 1H, CONH<sub>2</sub>), 5.41 (d,  $^3J_{\text{OH-2}'} = 5.4$ , 1H, OH<sub>2</sub>'), 4.86 (d,  $^3J_{\text{OH-3}'} = 8.3$ , 1H, OH<sub>3</sub>'), 4.81 (dd,  $^3J_{2'-\text{OH}} = 5.4$ ,  $^3J_{2'-3'} = 4.1$ , 1H, H<sub>2</sub>'), 4.02 (ddd,  $^3J_{4'-3'} = 8.5$ ,  $^3J_{4'-5'} = 5.3$ ,  $^3J_{4'-5'} = 3.2$ , 1H, H<sub>4</sub>'), 3.88 (m, 1H, H<sub>3</sub>'), 3.47 (dd,  $J_{\text{gem}} = 11.6$ ,  $^3J_{5'-4'} = 3.2$ , 1H, H<sub>5</sub>'), 3.25 (dd,  $J_{\text{gem}} = 11.6$ ,  $^3J_{5'-4'} = 5.3$ , 1H, H<sub>5</sub>'). <sup>13</sup>C NMR (100 MHz, CD<sub>3</sub>OD, 303 K):  $\delta$  (ppm) 174.3 (CO), 148.6 (C<sub>4</sub>), 87.9 (C<sub>5</sub>), 86.8 (C<sub>1</sub>'), 85.4 (C<sub>4</sub>'), 76.8 (C<sub>2</sub>'), 73.2 (C<sub>3</sub>'), 63.7 (C<sub>5</sub>'). HRMS (ESI<sup>-</sup>): calcd for [M+Na]<sup>+</sup> C<sub>8</sub>H<sub>10</sub>N<sub>4</sub>O<sub>5</sub>I = 368.9696; found 368.9695.

X-ray single-crystal diffraction data were collected on a Rigaku Oxford Diffraction SuperNova diffractometer equipped with Atlas CCD detector and micro-focus Cu-K $\alpha$  radiation ( $\lambda = 1.54184$  Å). The structures were solved by dual-space algorithm, expanded and refined on F<sup>2</sup> by full matrix least-squares techniques using SHELX programs (G. M. Sheldrick, SHELXT 2018/2 and SHELXL 2018/3). All non-H atoms were refined anisotropically and multiscan empirical absorption was corrected using CrysAlisPro program (CrysAlisPro, Agilent Technologies, V1.171.38.46, 2015 for **5'b**). The H atoms were placed at calculated positions and refined using a riding model.

Crystallographic data for **5'b**:

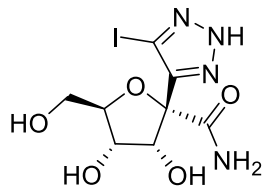

$C_{16}H_{26}I_2N_8O_{12}$ ,  $M = 776.25$ ,  $T=294K$ , colorless needle,  $0.072 \times 0.035 \times 0.016 \text{ mm}^3$ , monoclinic, space group  $P2_1$ ,  $a = 7.1449(9) \text{ \AA}$ ,  $b = 15.429(3) \text{ \AA}$ ,  $c = 11.890(2) \text{ \AA}$ ,  $\beta = 99.95(1)^\circ$ ,  $V = 1291.0(4) \text{ \AA}^3$ ,  $Z = 2$ ,  $\rho_{\text{calc}} = 1.997 \text{ g/cm}^3$ ,  $\mu = 19.813 \text{ mm}^{-1}$ ,  $F(000) = 760$ ,  $\theta_{\text{min}} = 3.774^\circ$ ,  $\theta_{\text{max}} = 73.497^\circ$ , 6796 reflections collected, 4304 unique ( $R_{\text{int}} = 0.0652$ ), parameters / restraints = 349 / 1,  $R1 = 0.0641$  and  $wR2 = 0.1486$  using 2910 reflections with  $I > 2\sigma(I)$ ,  $R1 = 0.0904$  and  $wR2 = 0.1763$  using all data, absolute structure parameter =  $-0.02(2)$ ,  $GOF = 0.997$ ,  $-1.336 < \Delta\rho < 0.925 \text{ e.\AA}^{-3}$ .

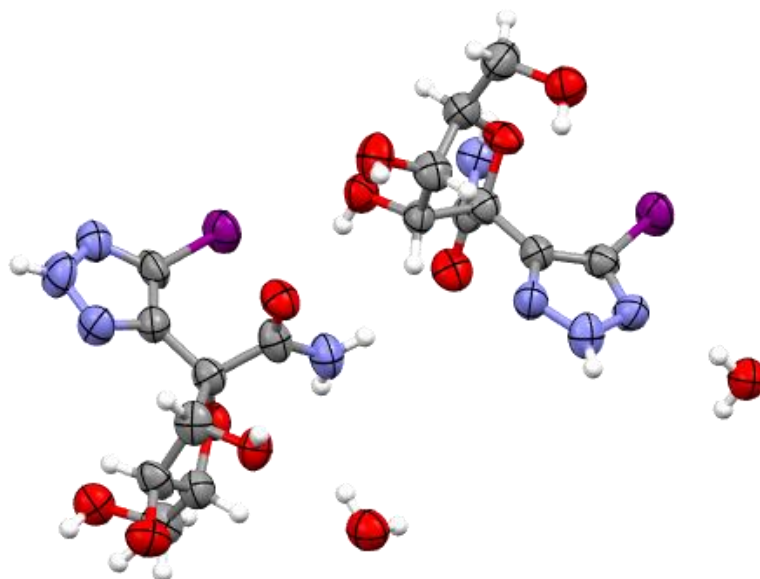

# <sup>1</sup>H and <sup>13</sup>C NMR spectra of compound (6)

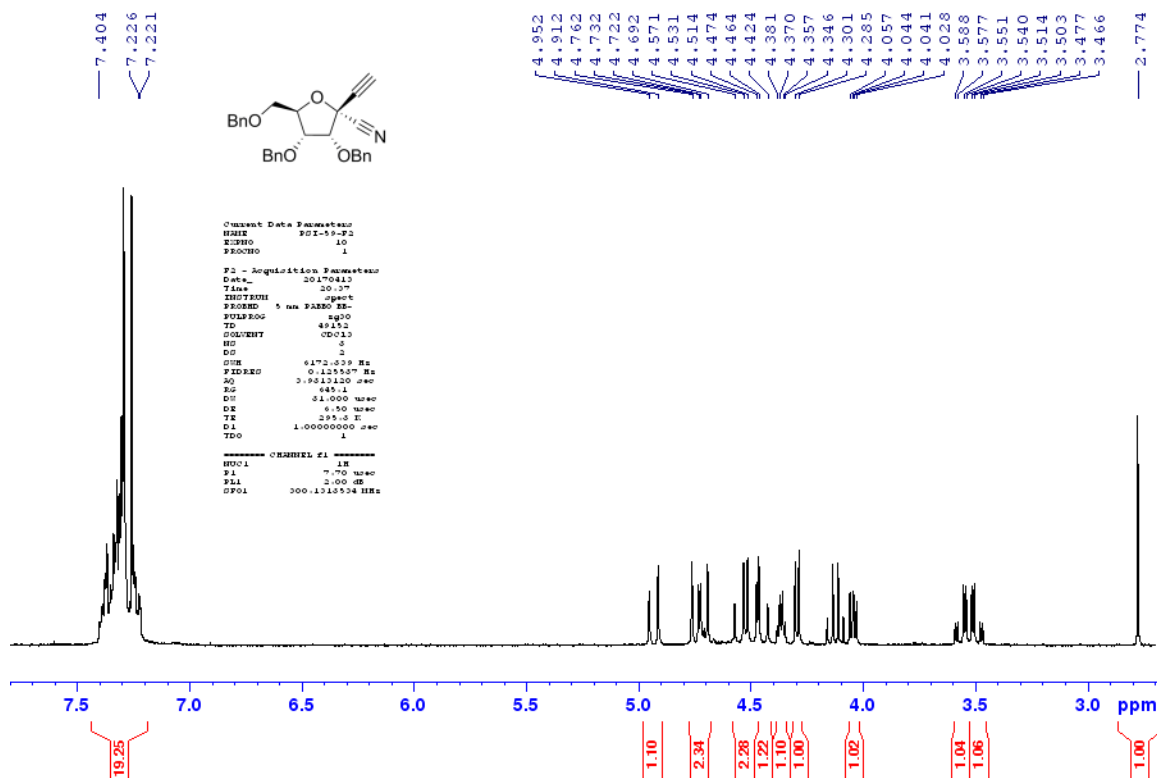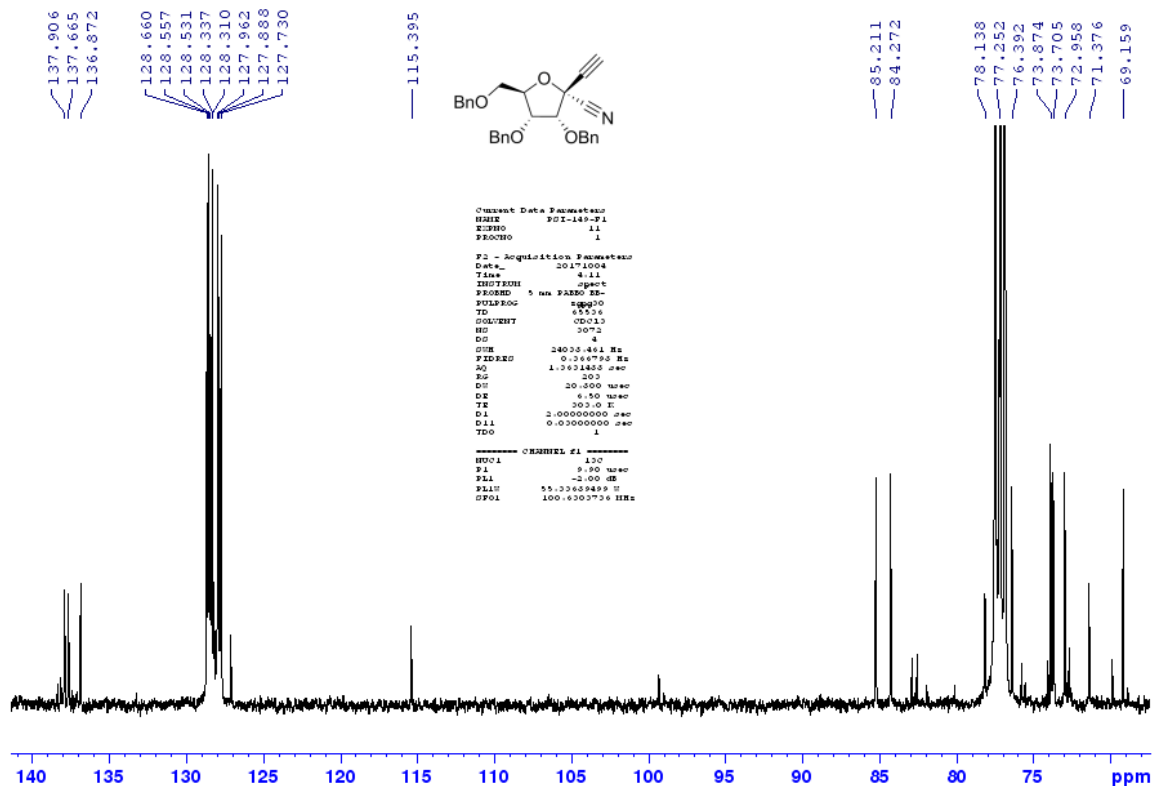

<sup>1</sup>H and <sup>13</sup>C NMR spectra of compound (9α)

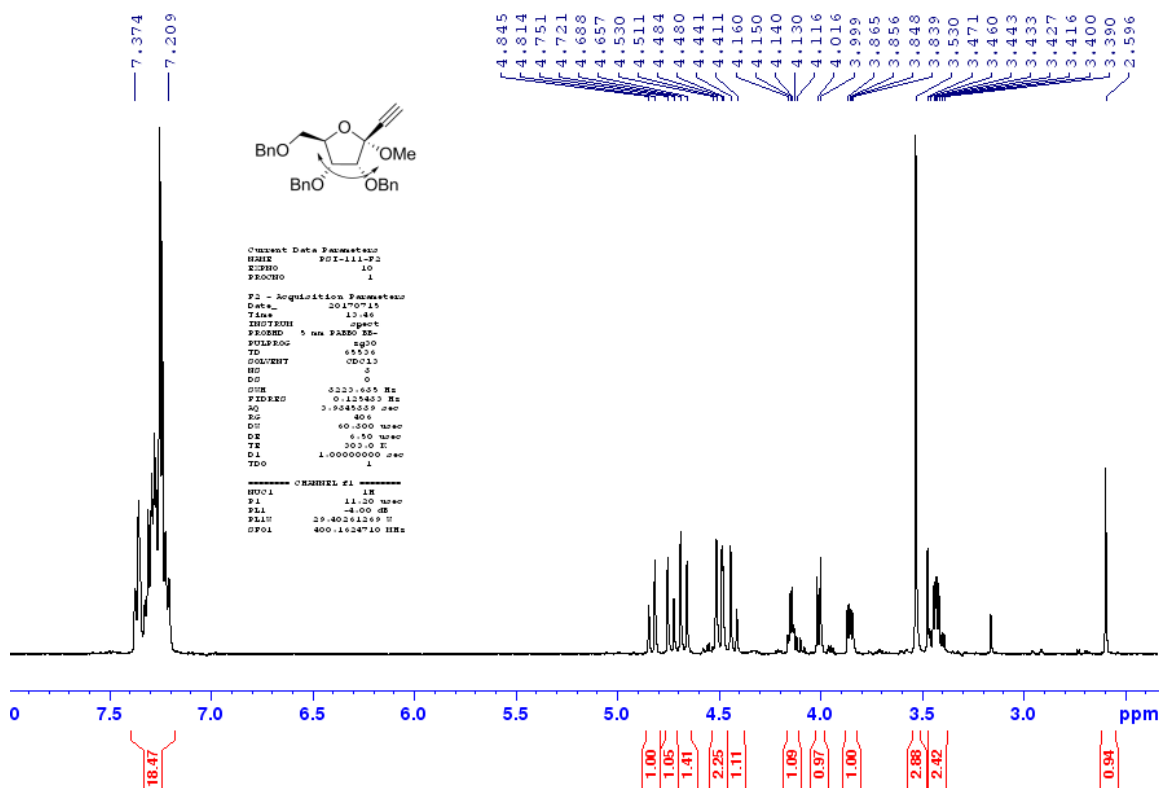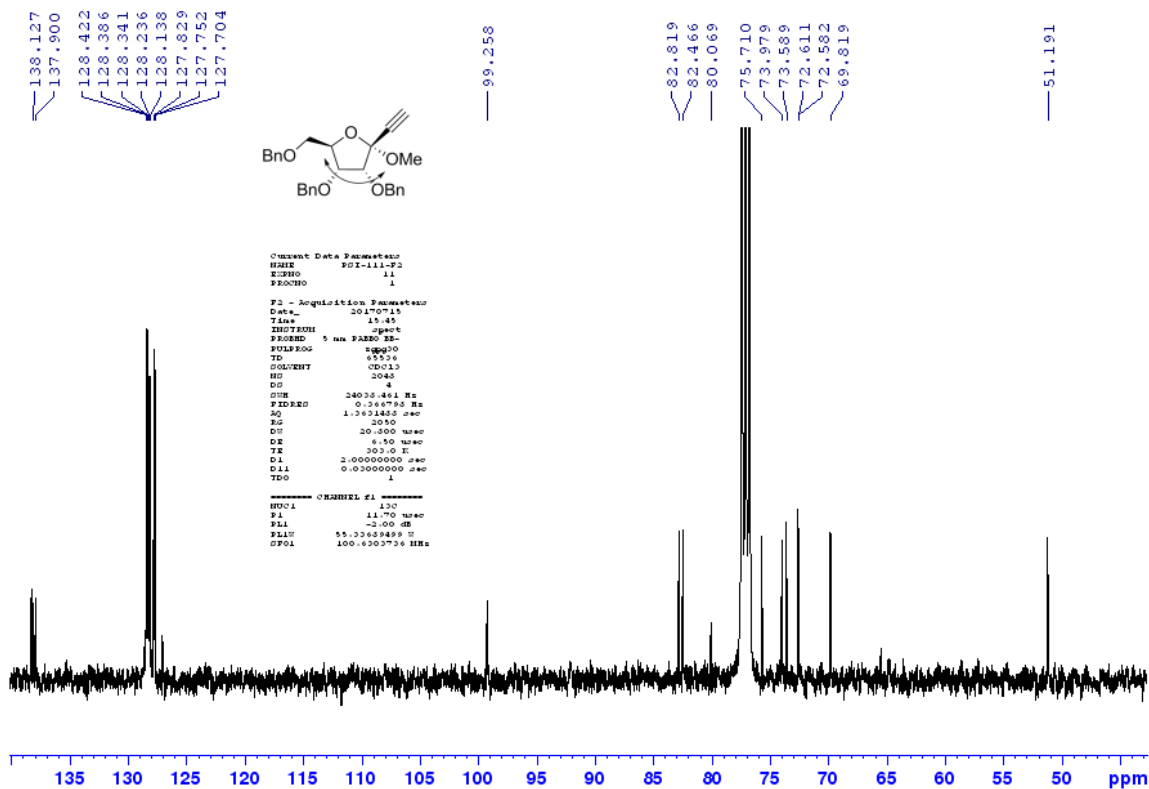

# <sup>1</sup>H and <sup>13</sup>C NMR spectra of compound (9β)

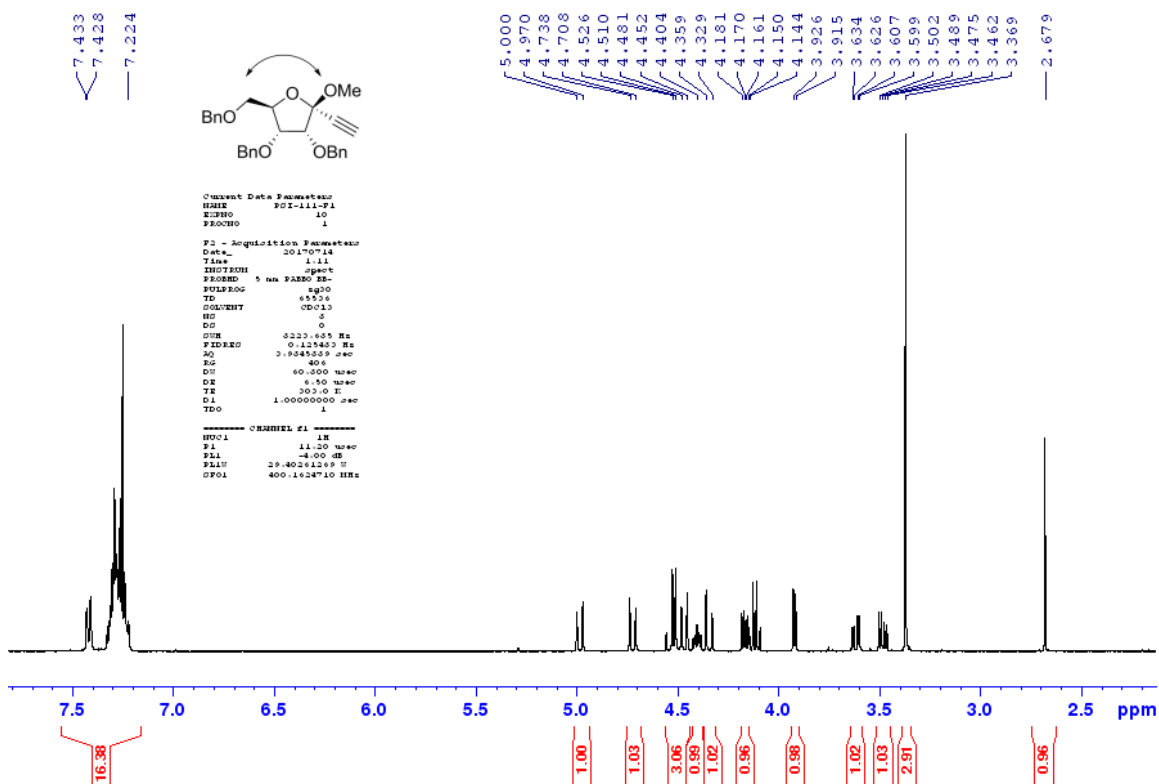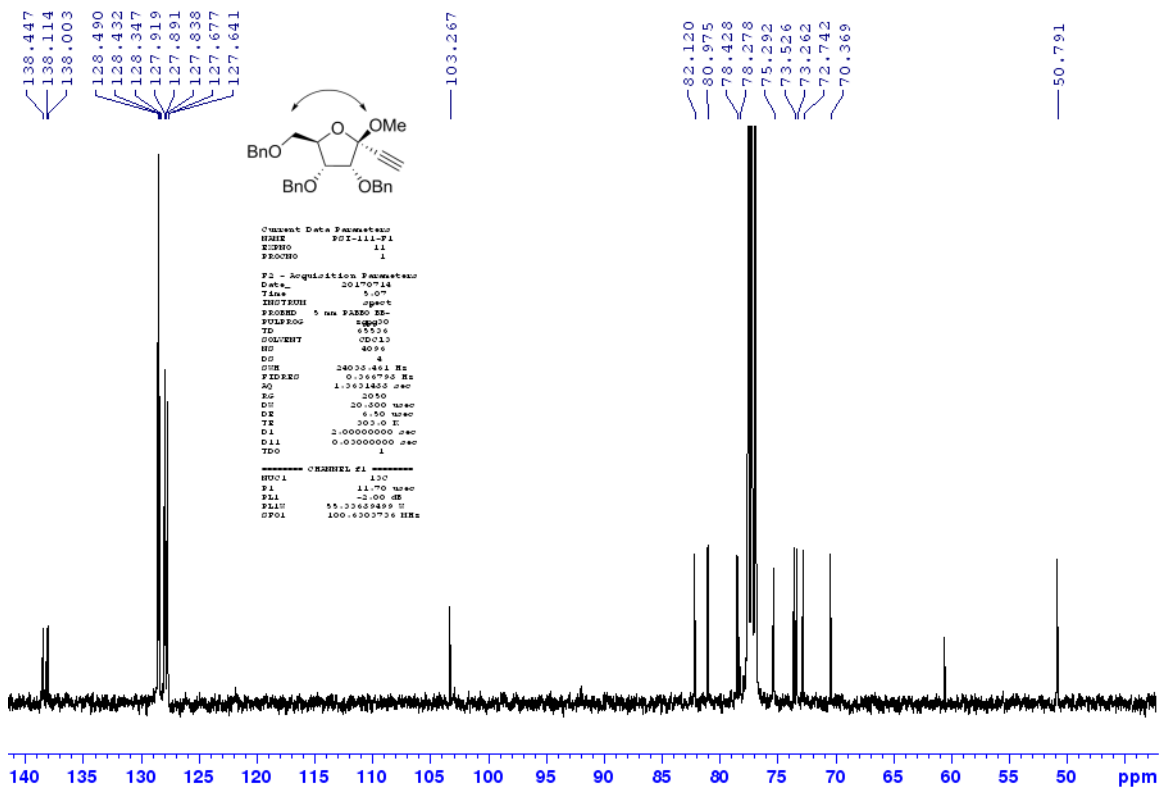

# <sup>1</sup>H and <sup>13</sup>C NMR spectra of compound (11a)

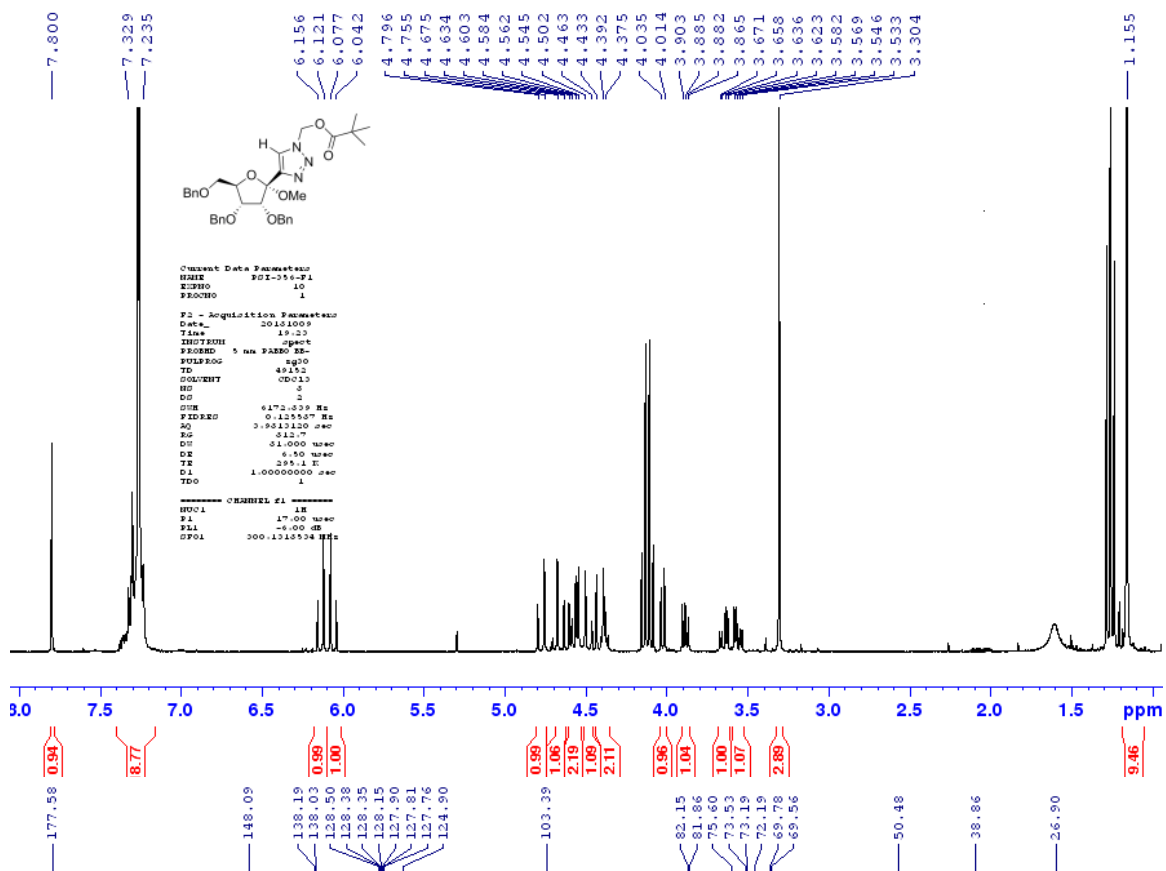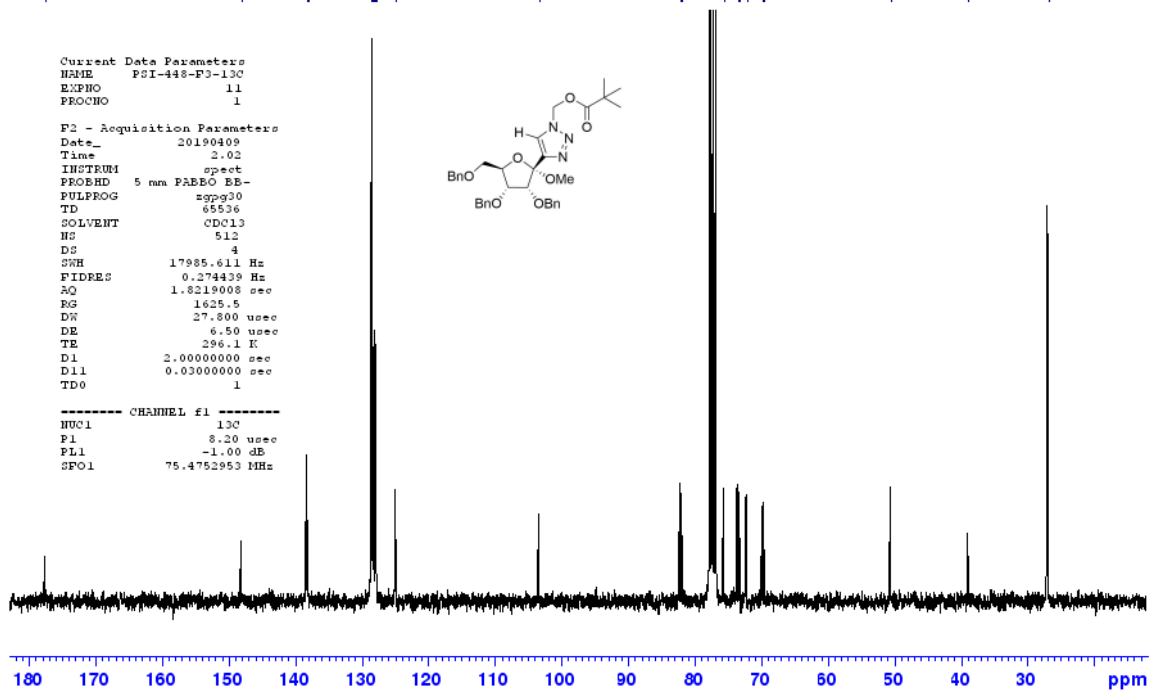

# <sup>1</sup>H and <sup>13</sup>C NMR spectra of compound (11b)

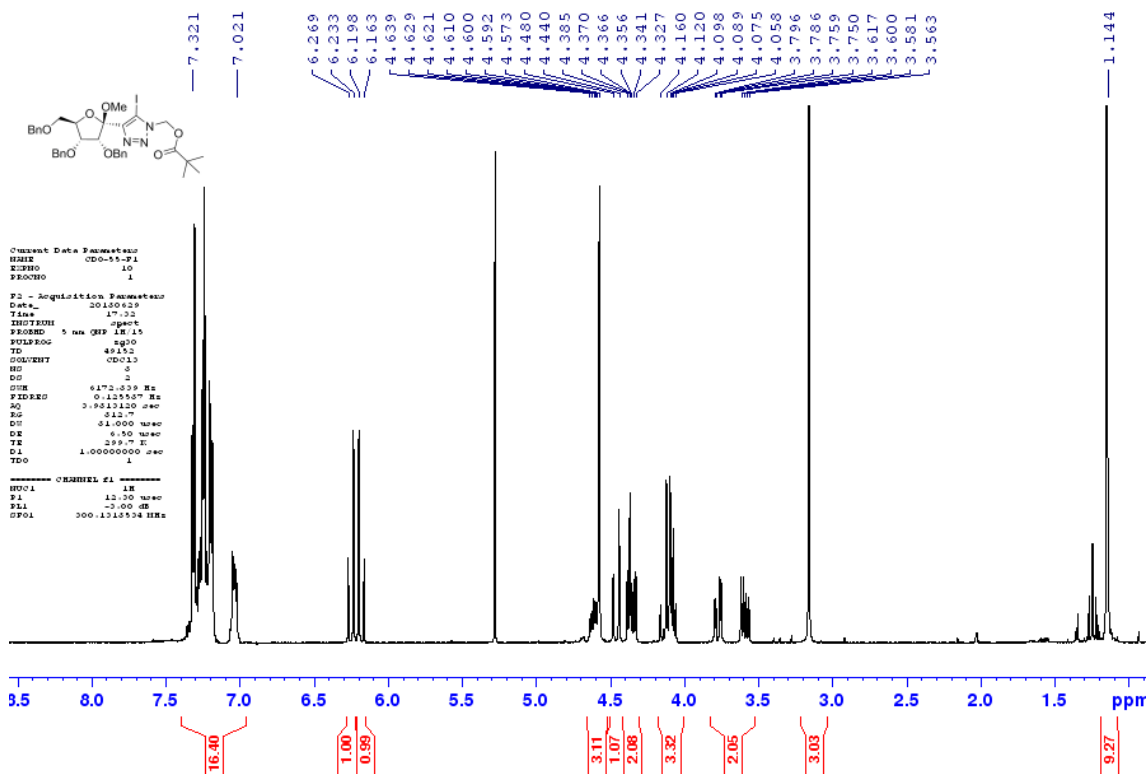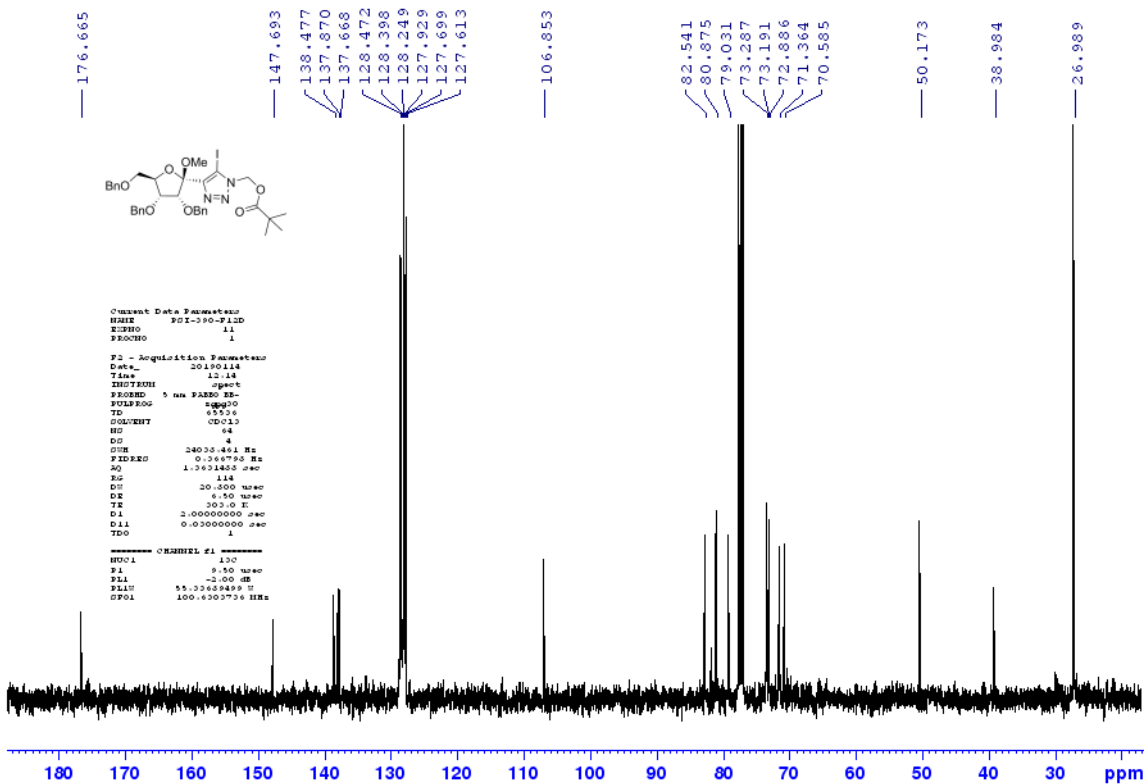





<sup>1</sup>H, <sup>19</sup>F and <sup>13</sup>C NMR spectra of compound (11d)

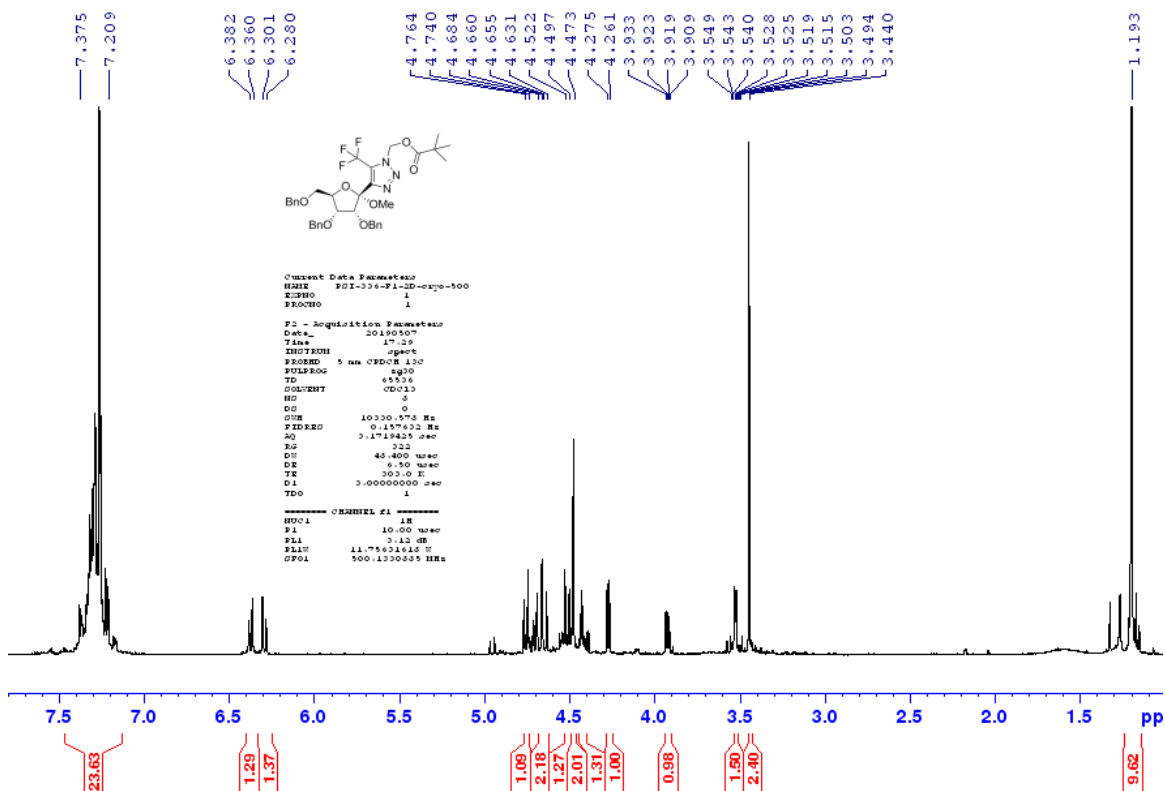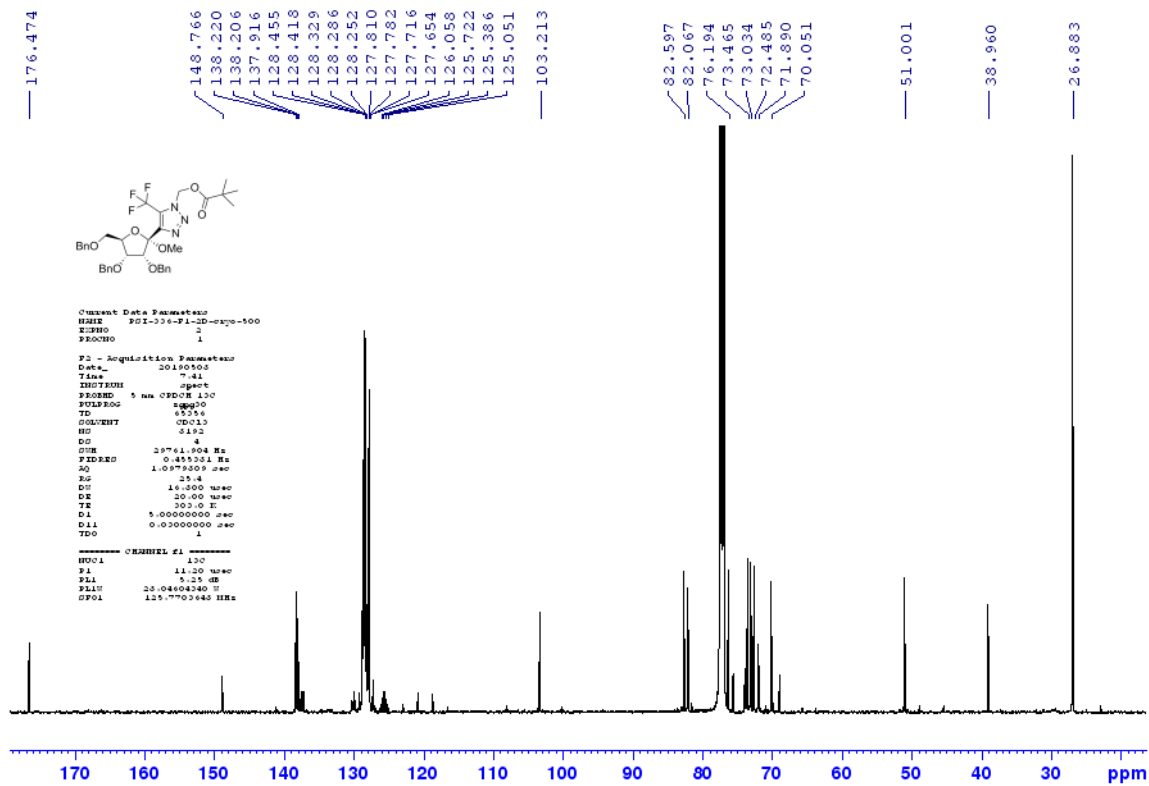

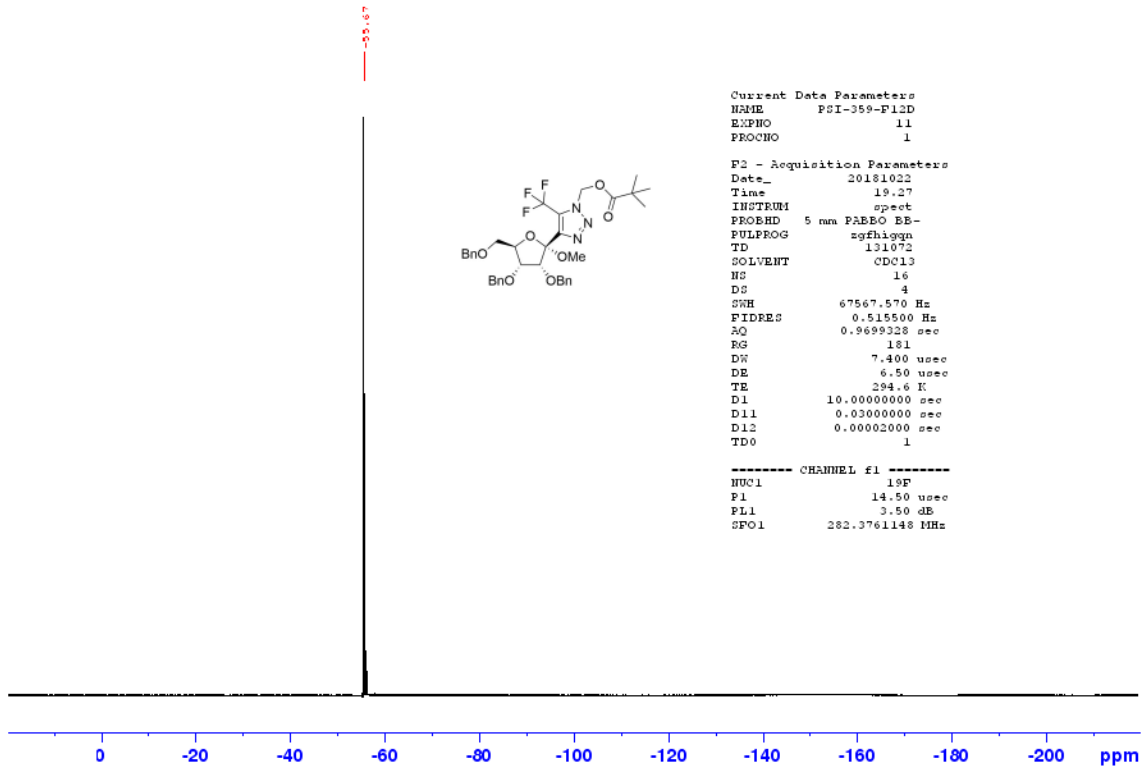

# <sup>1</sup>H and <sup>13</sup>C NMR spectra of compound (11h)

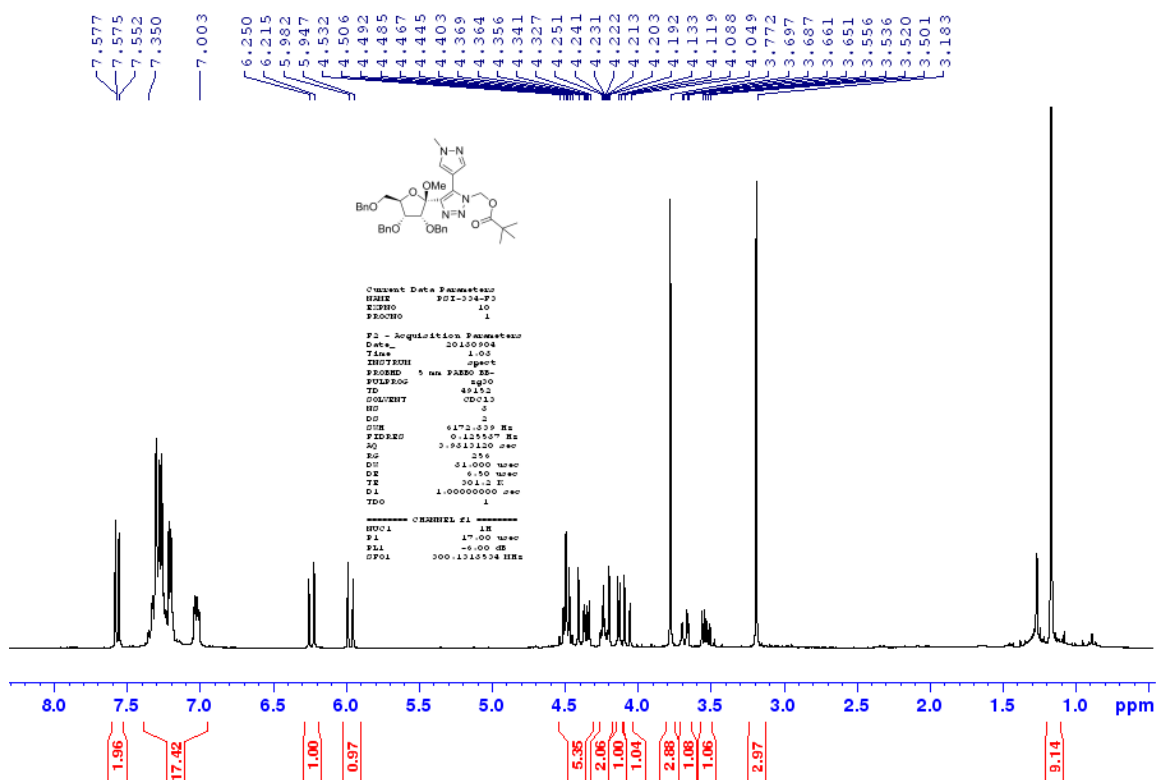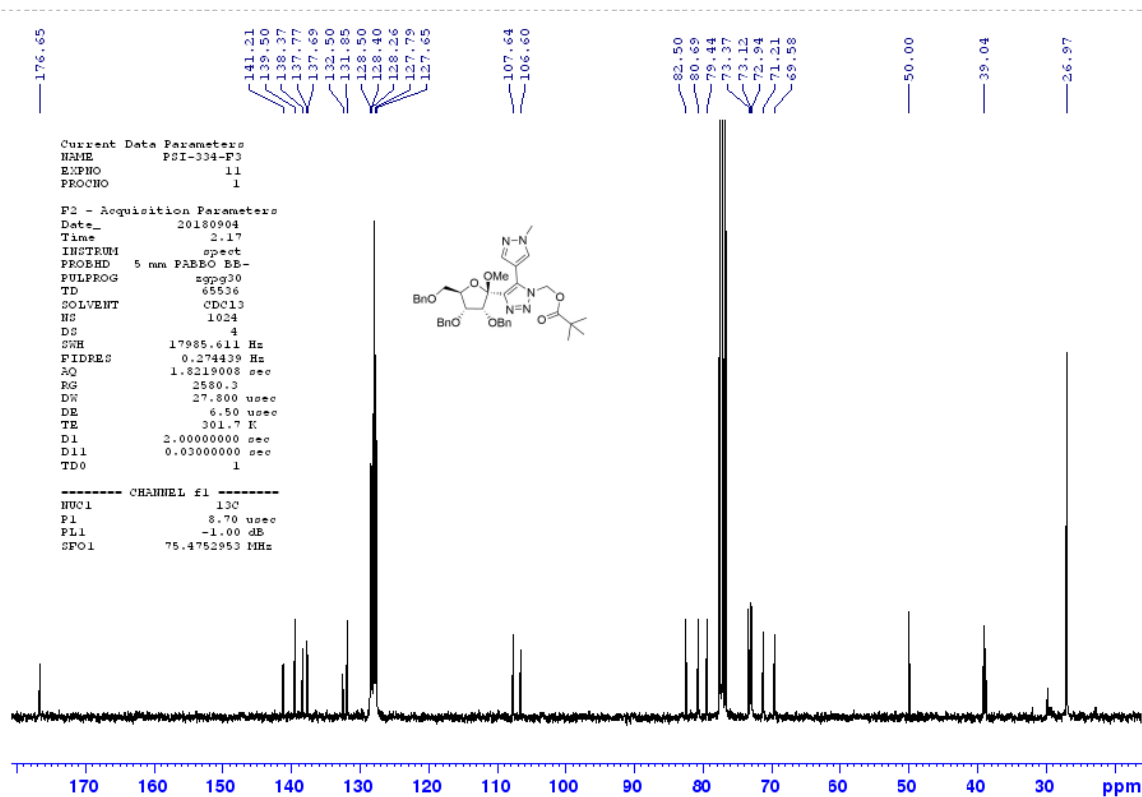

# <sup>1</sup>H and <sup>13</sup>C NMR spectra of compound (14)

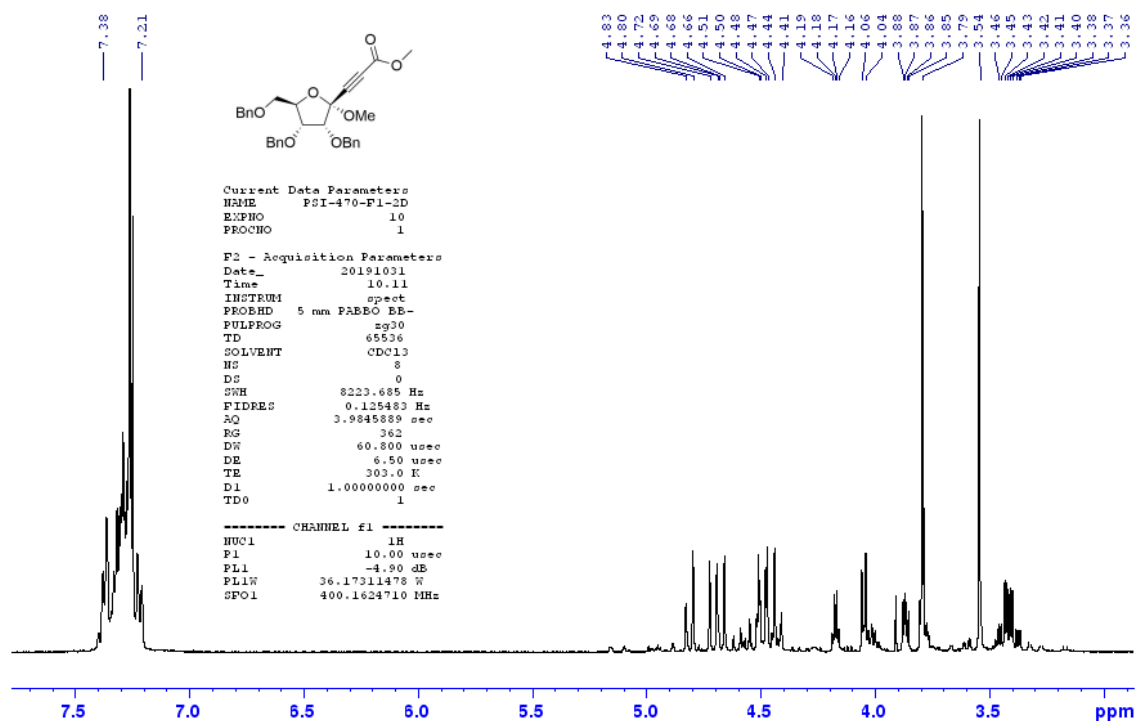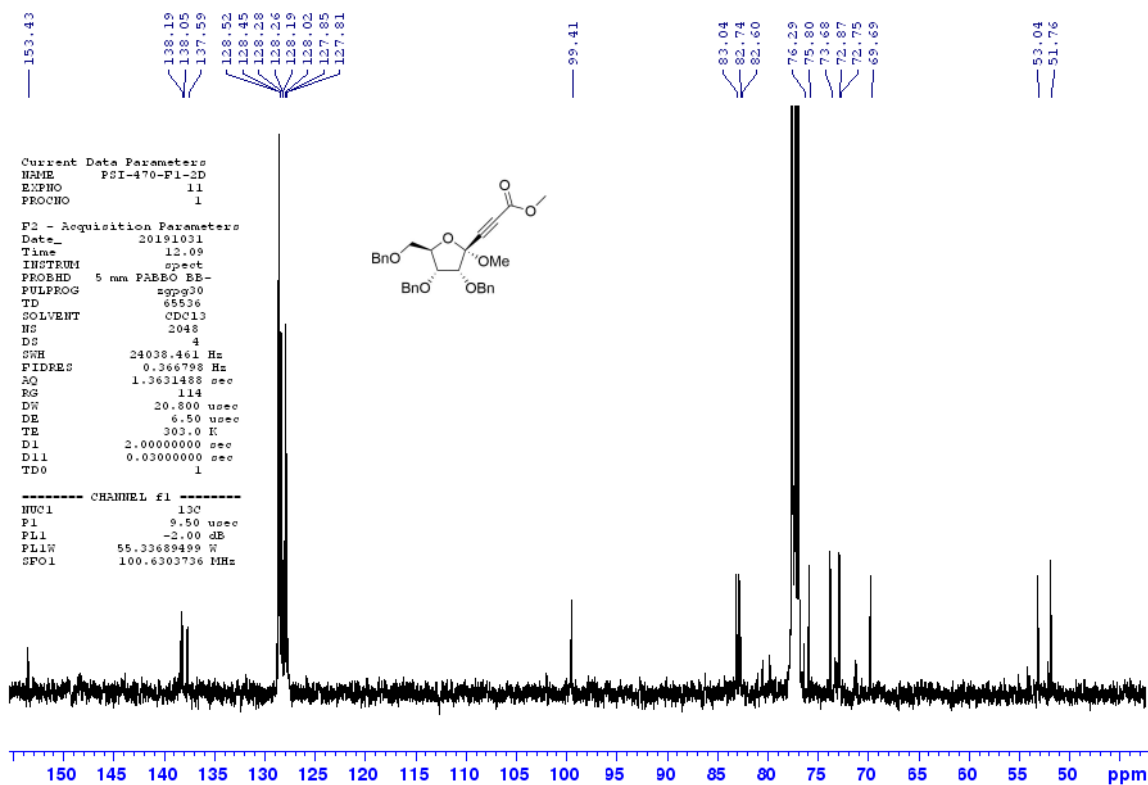

# <sup>1</sup>H and <sup>13</sup>C NMR spectra of compound (11i)

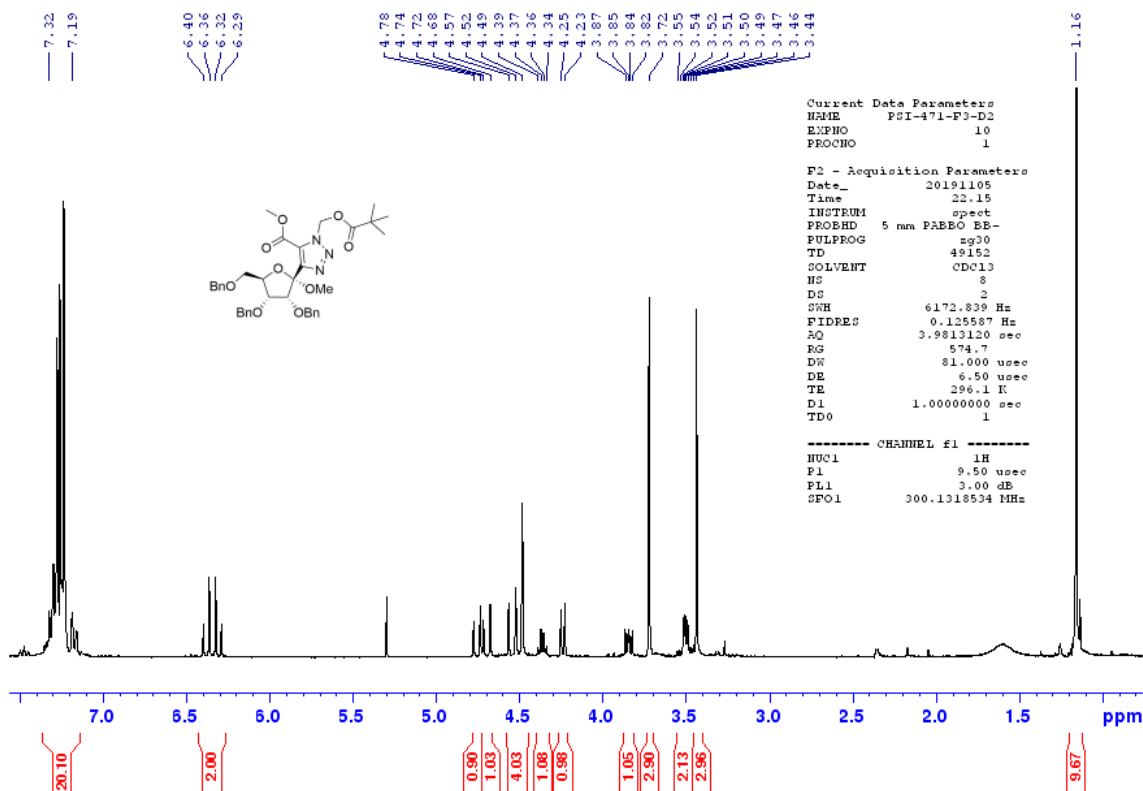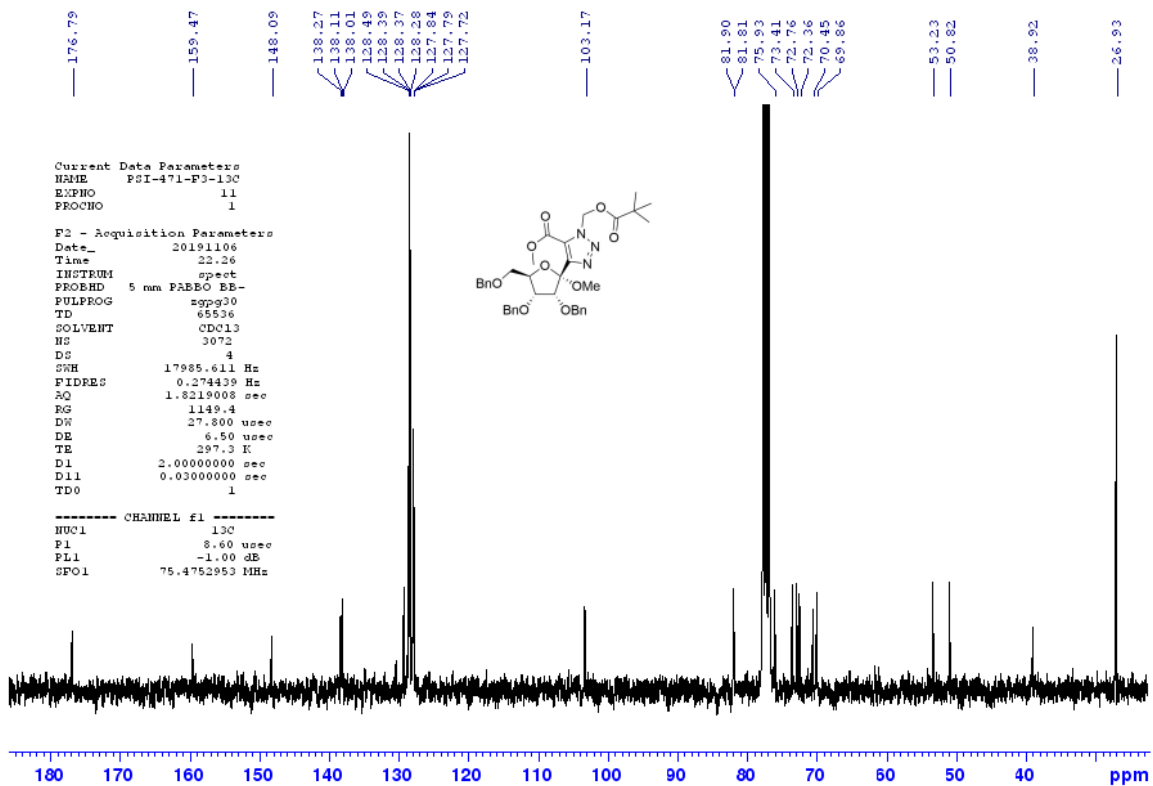

<sup>1</sup>H and <sup>13</sup>C NMR spectra of compound (11'i)

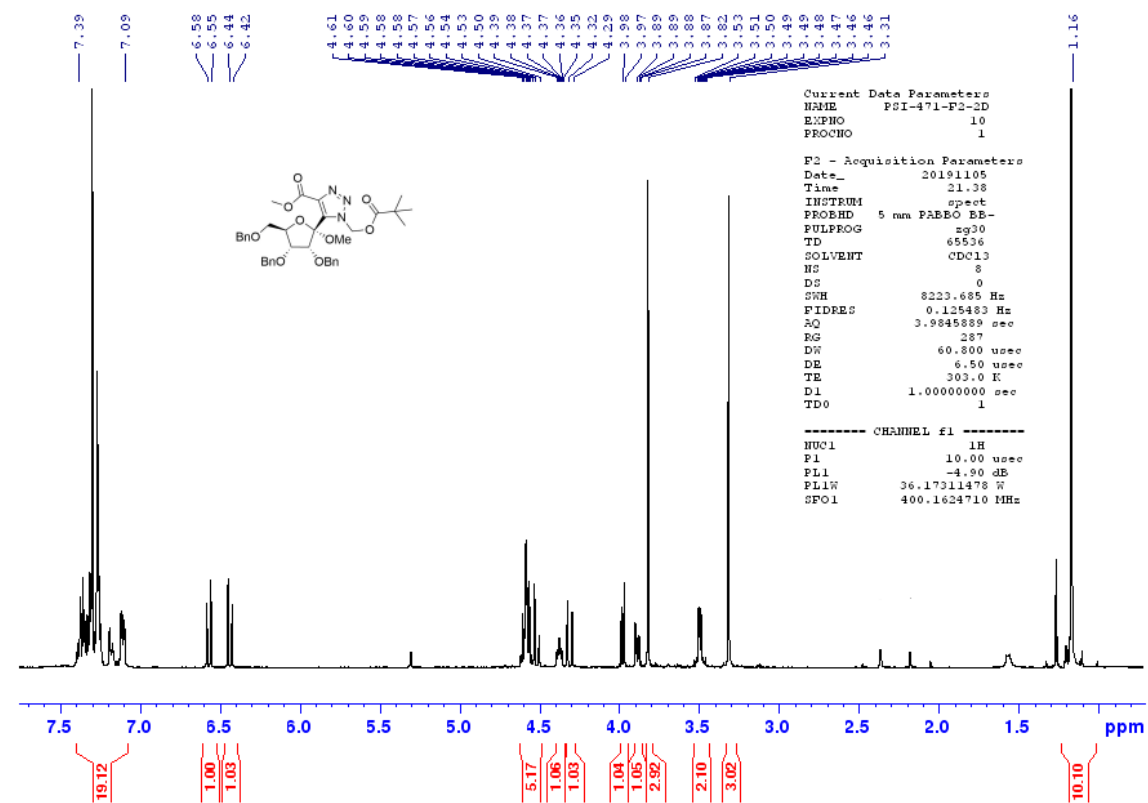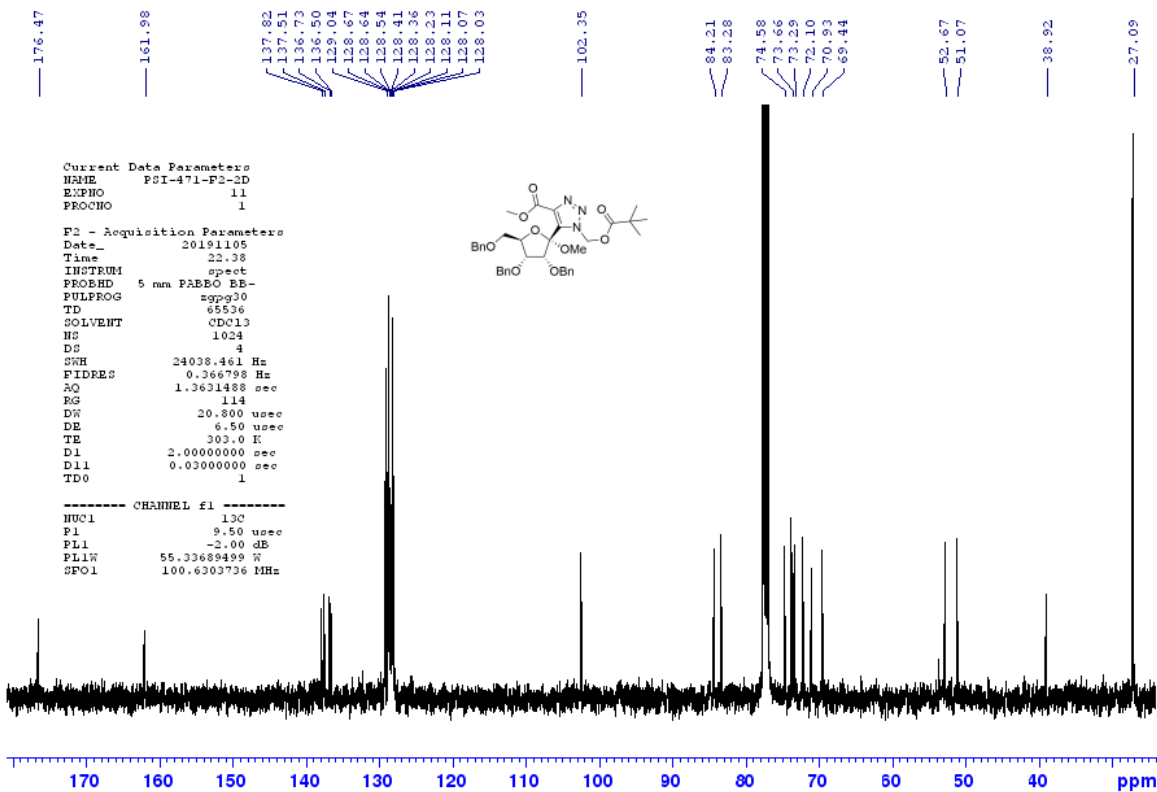

# <sup>1</sup>H and <sup>13</sup>C NMR spectra of compound (12a)

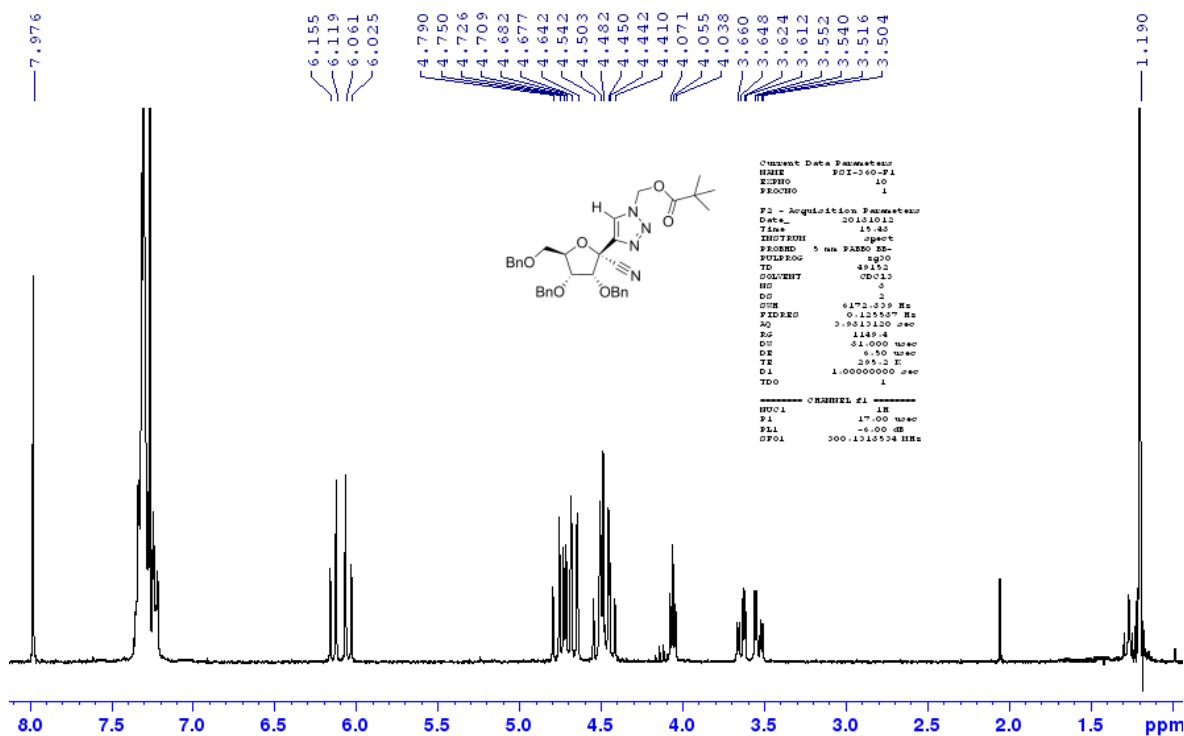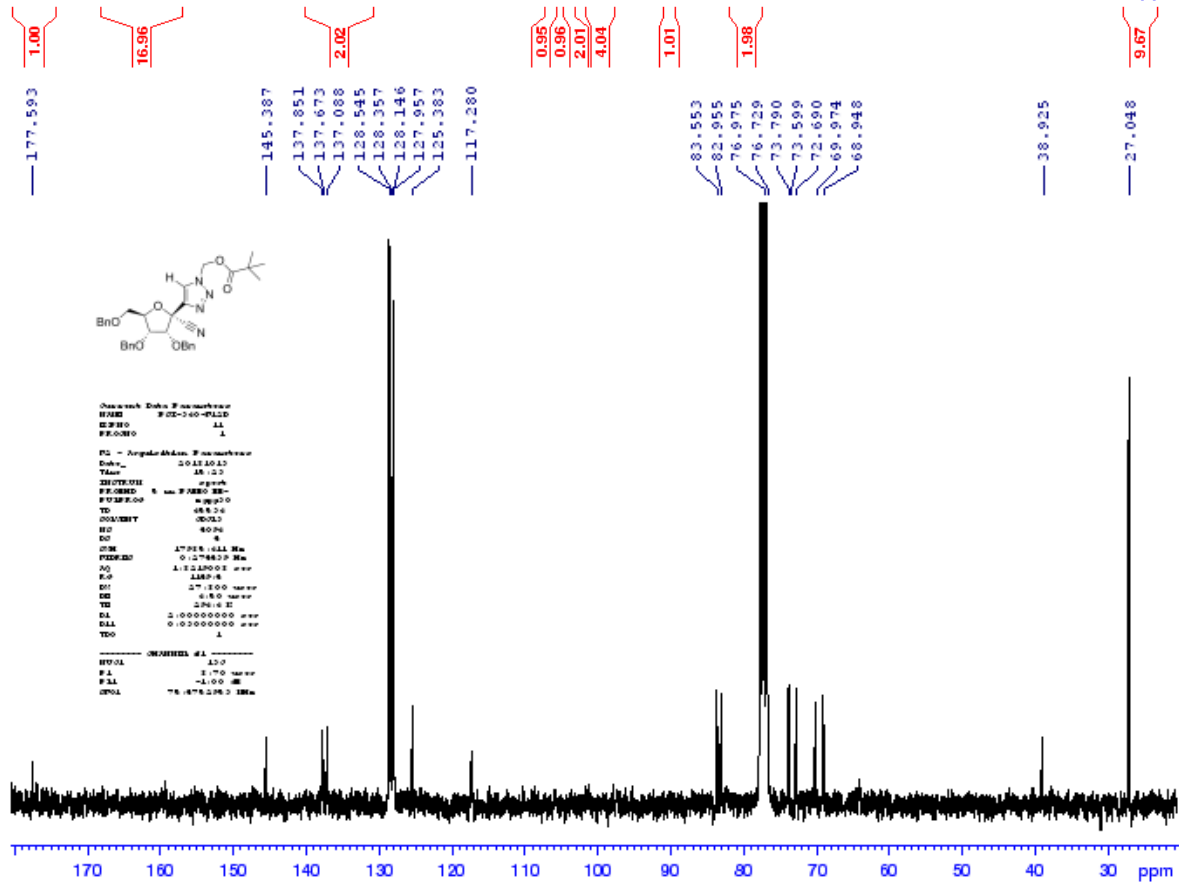







<sup>1</sup>H, <sup>19</sup>F and <sup>13</sup>C NMR spectra of compound (12d)

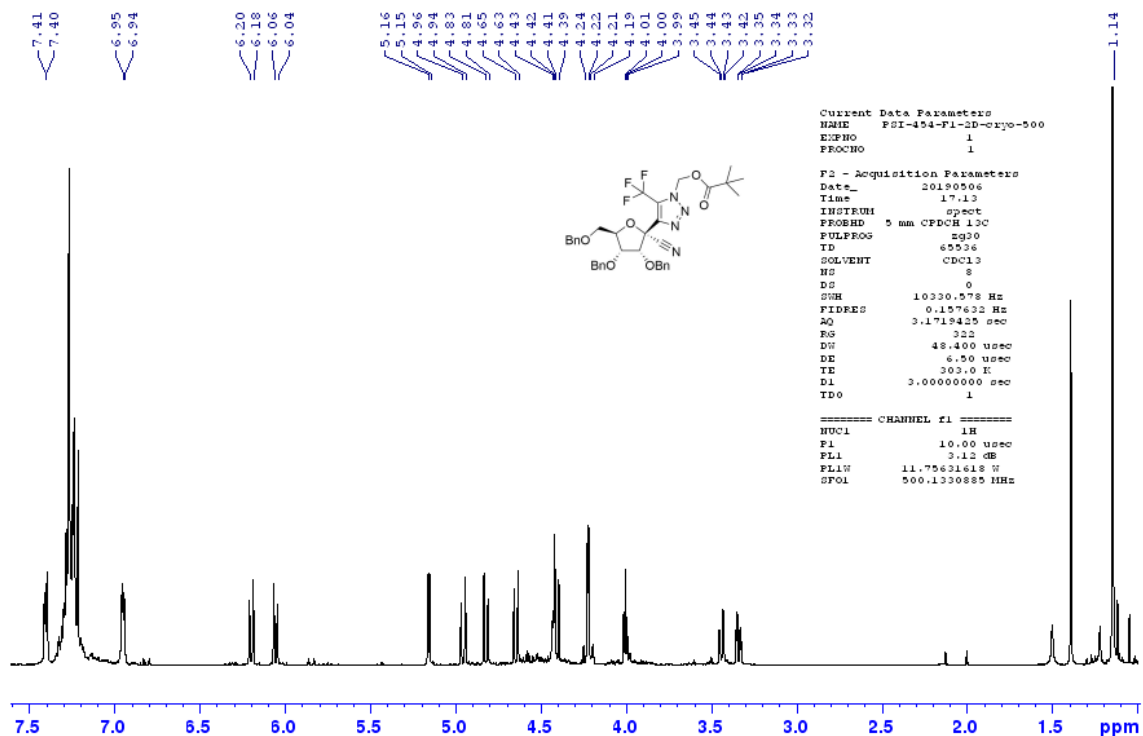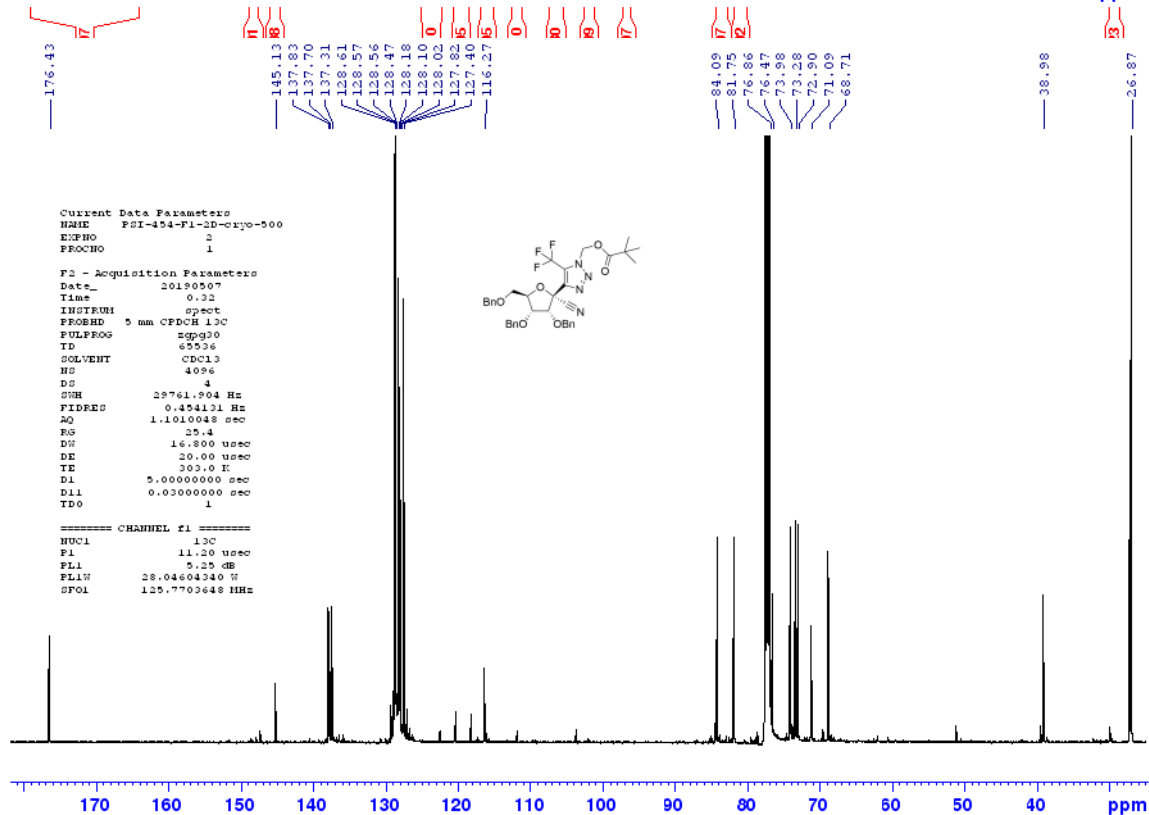

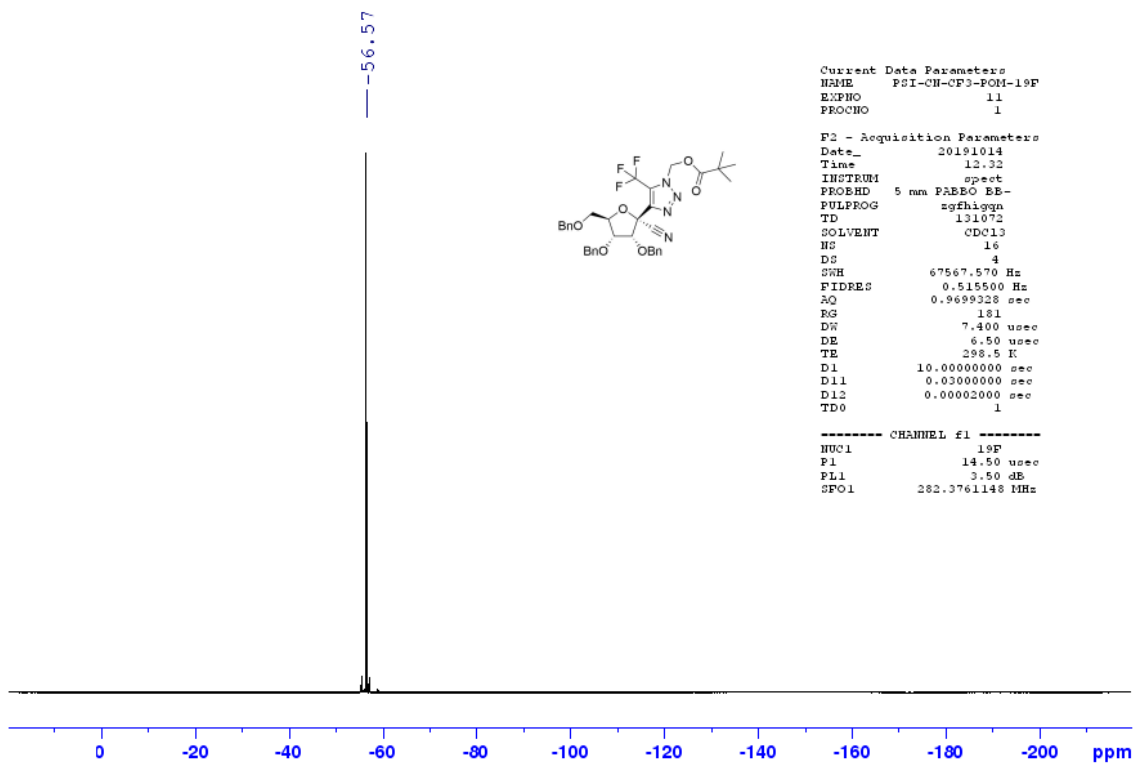

<sup>1</sup>H and <sup>13</sup>C NMR spectra of compound (12e)

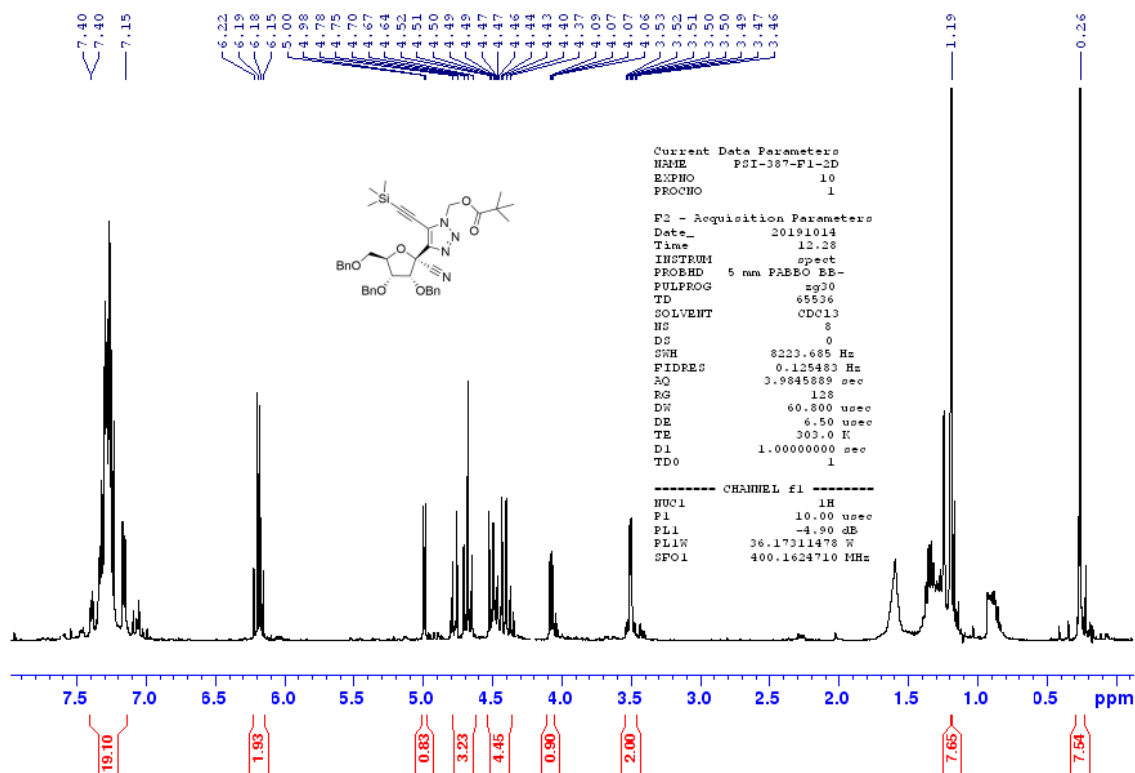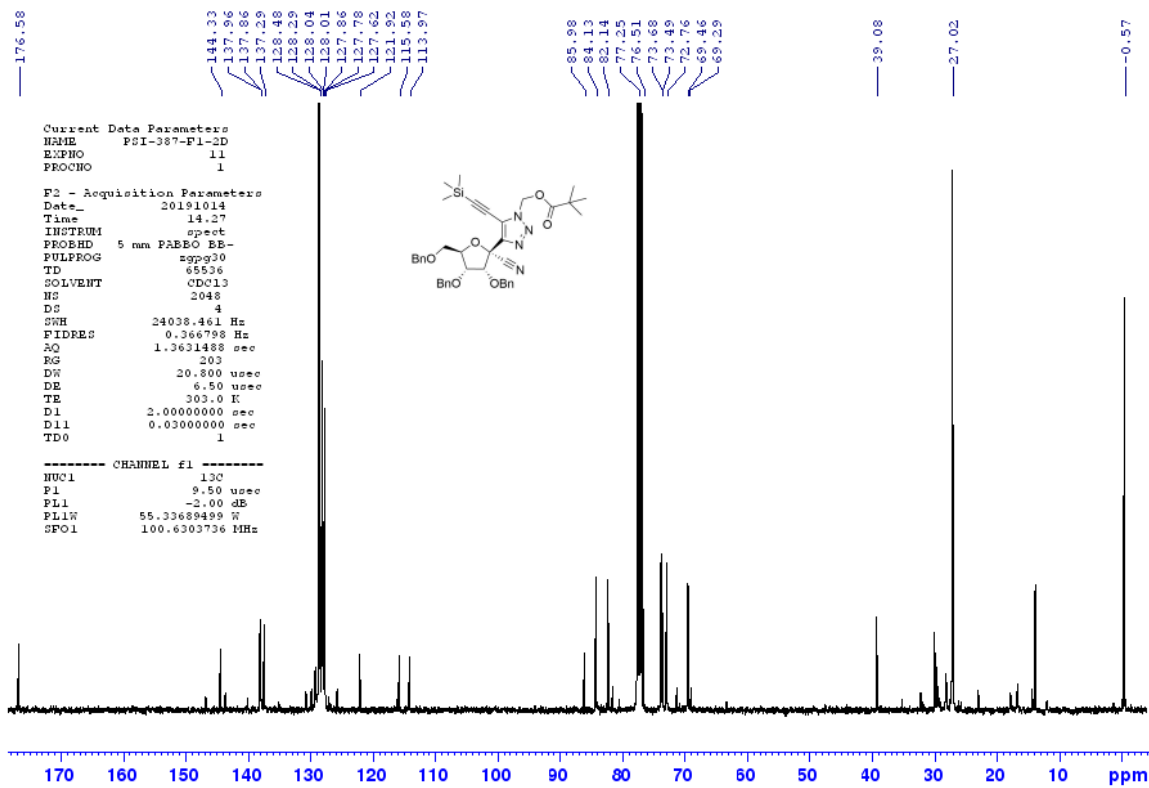

<sup>1</sup>H and <sup>13</sup>C NMR spectra of compound (12f)

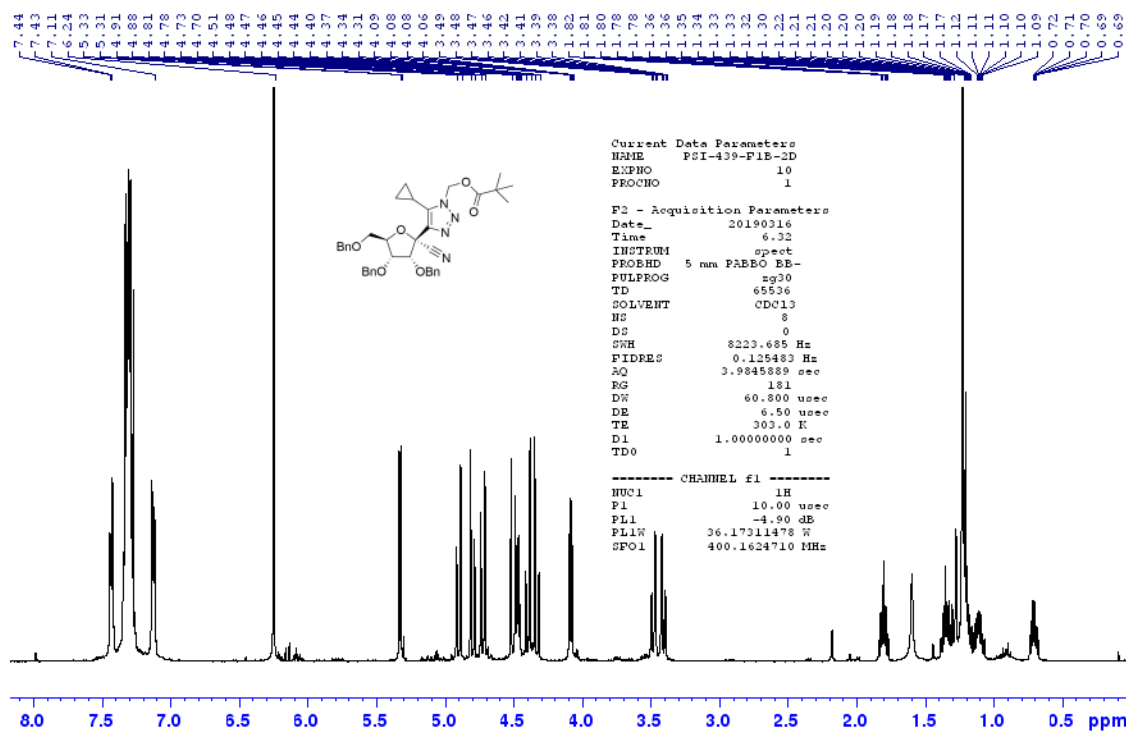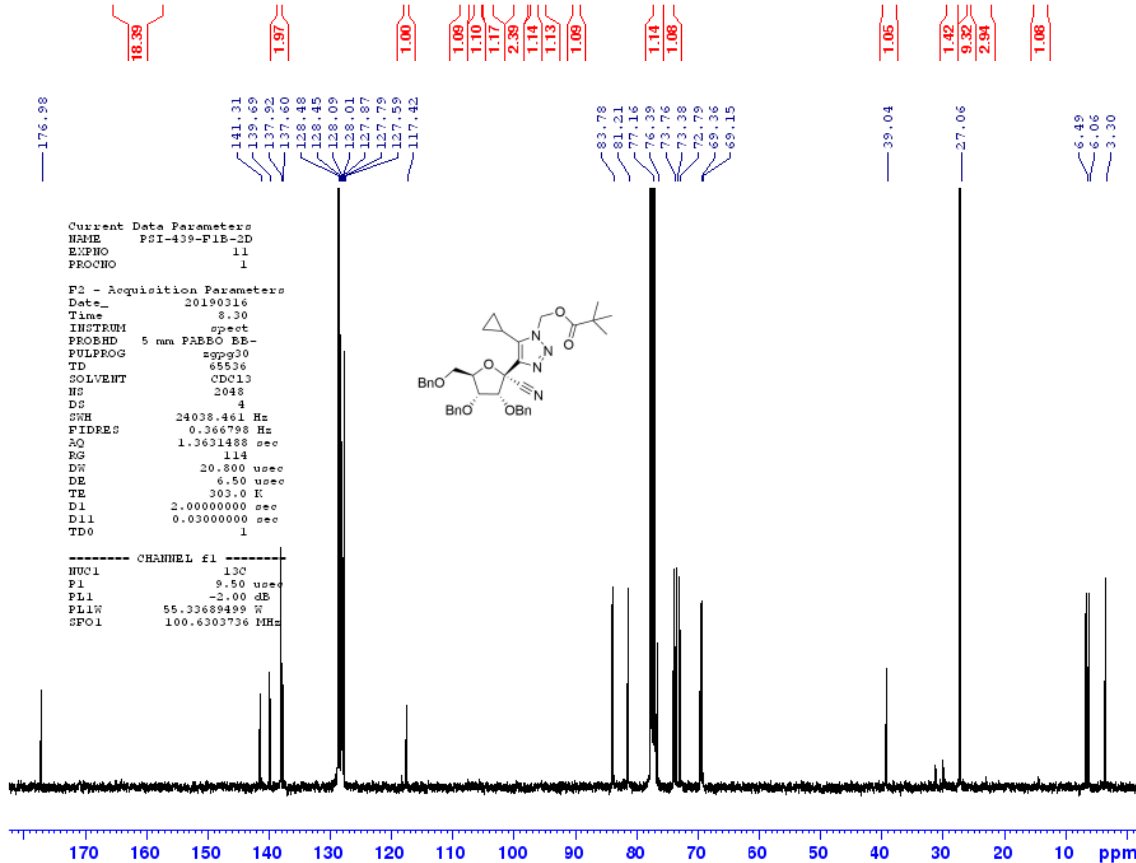

# <sup>1</sup>H and <sup>13</sup>C NMR spectra of compound (12g)

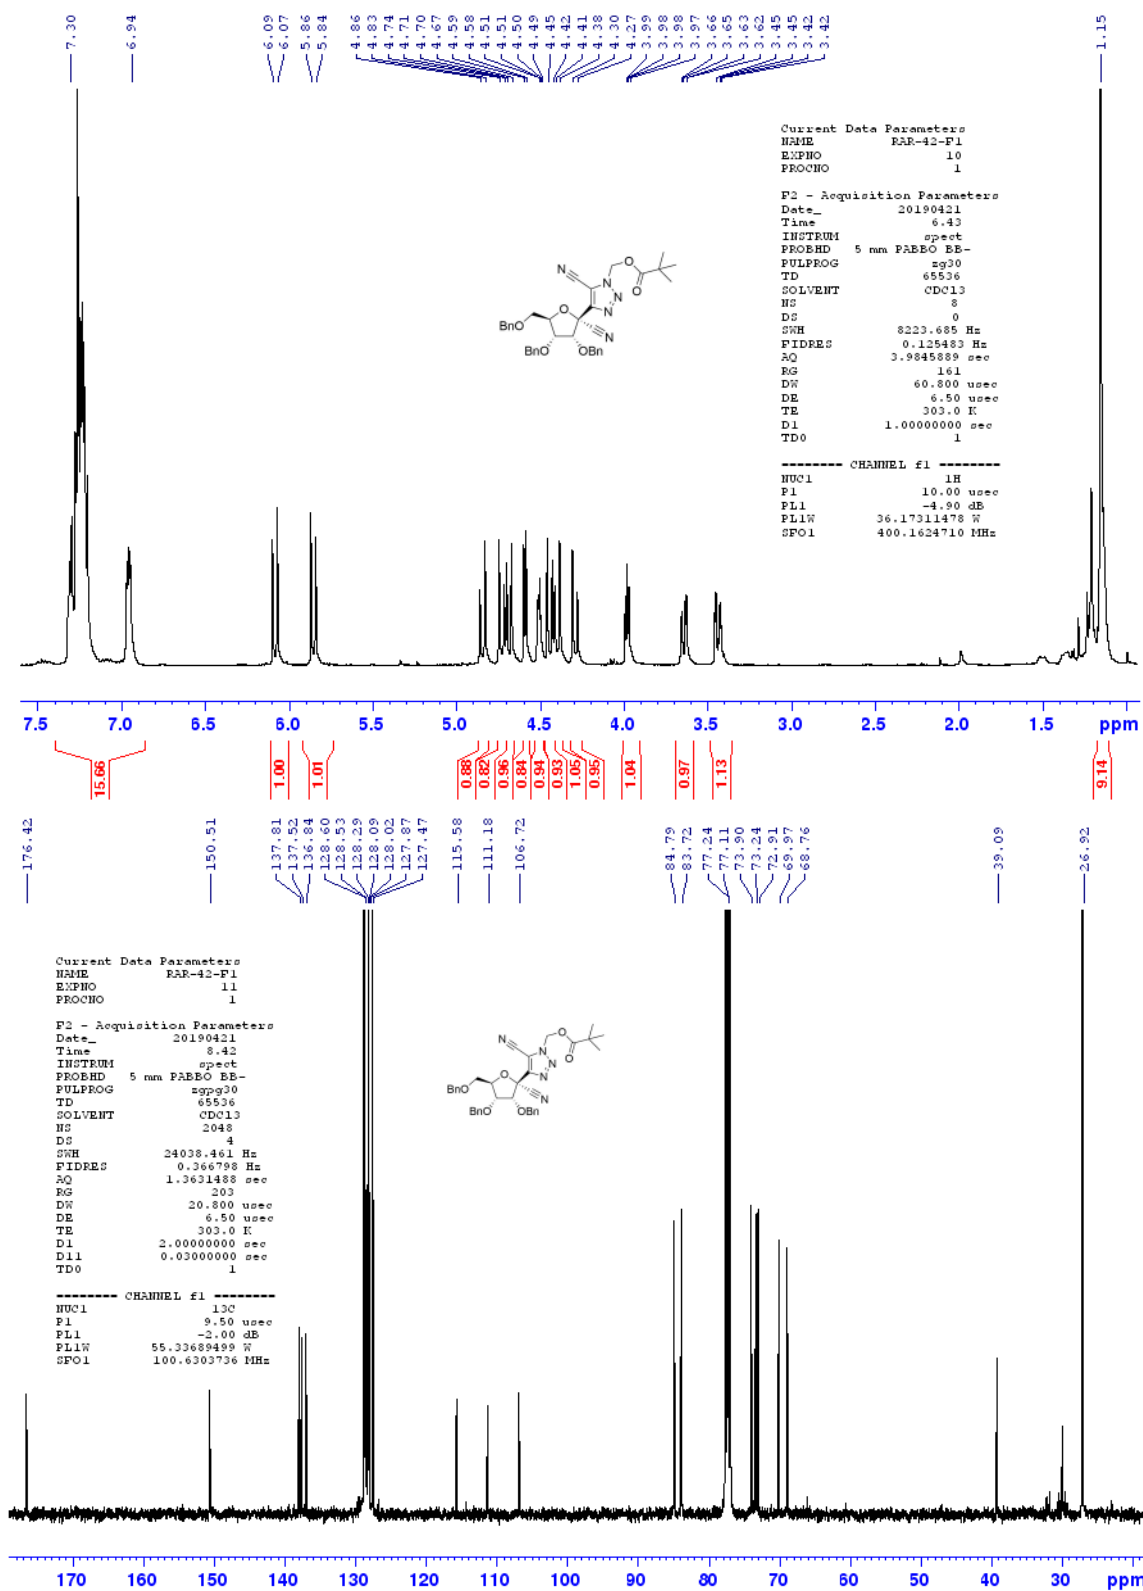

# <sup>1</sup>H and <sup>13</sup>C NMR spectra of compound (12h)

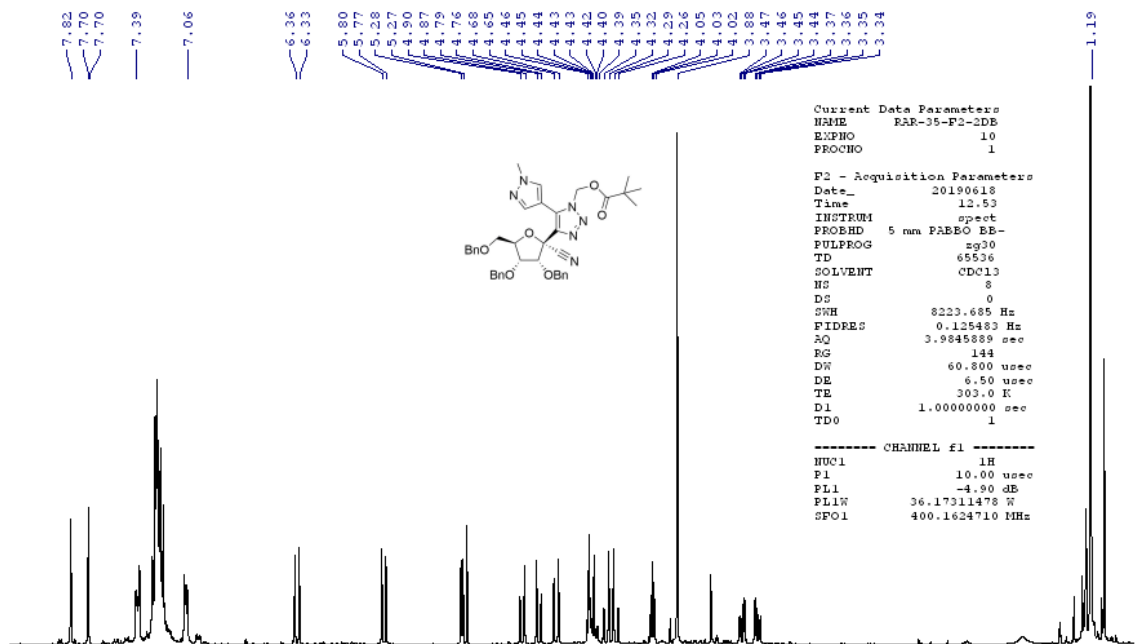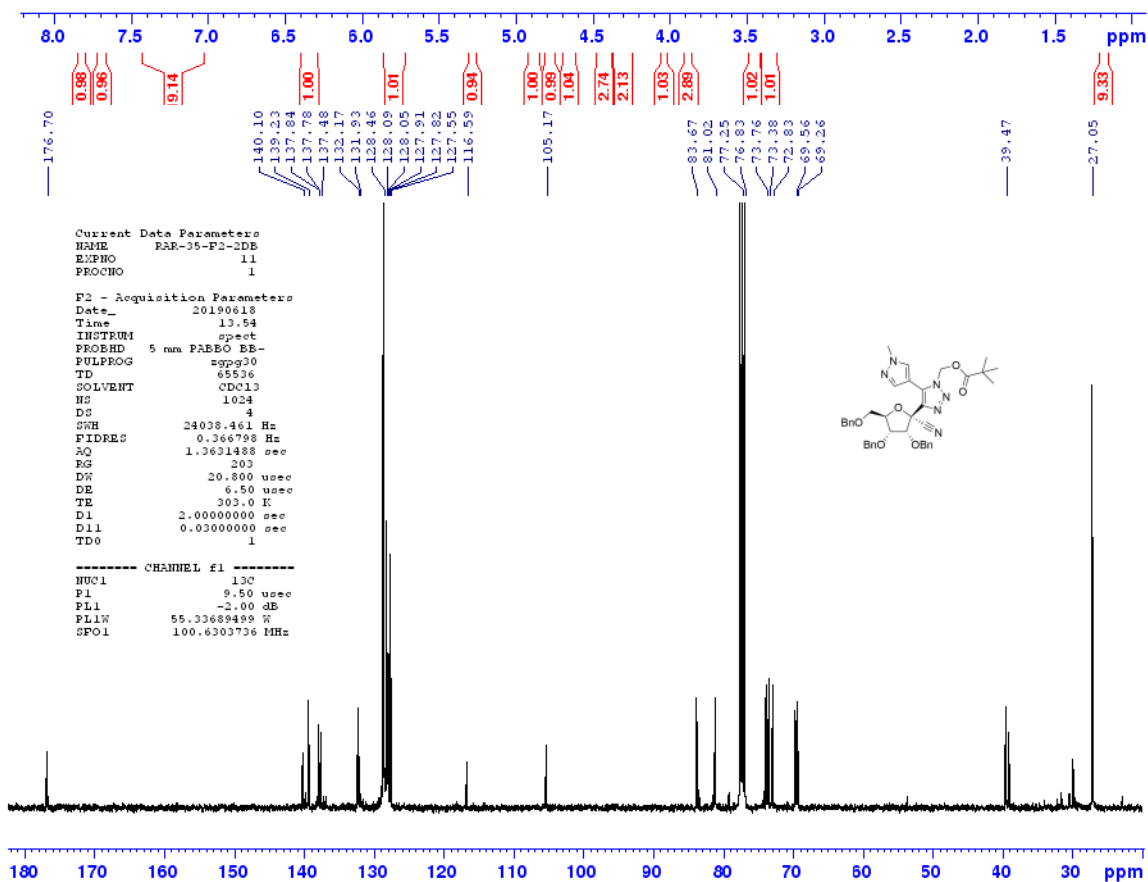



<sup>1</sup>H and <sup>13</sup>C NMR spectra of compound (12i)

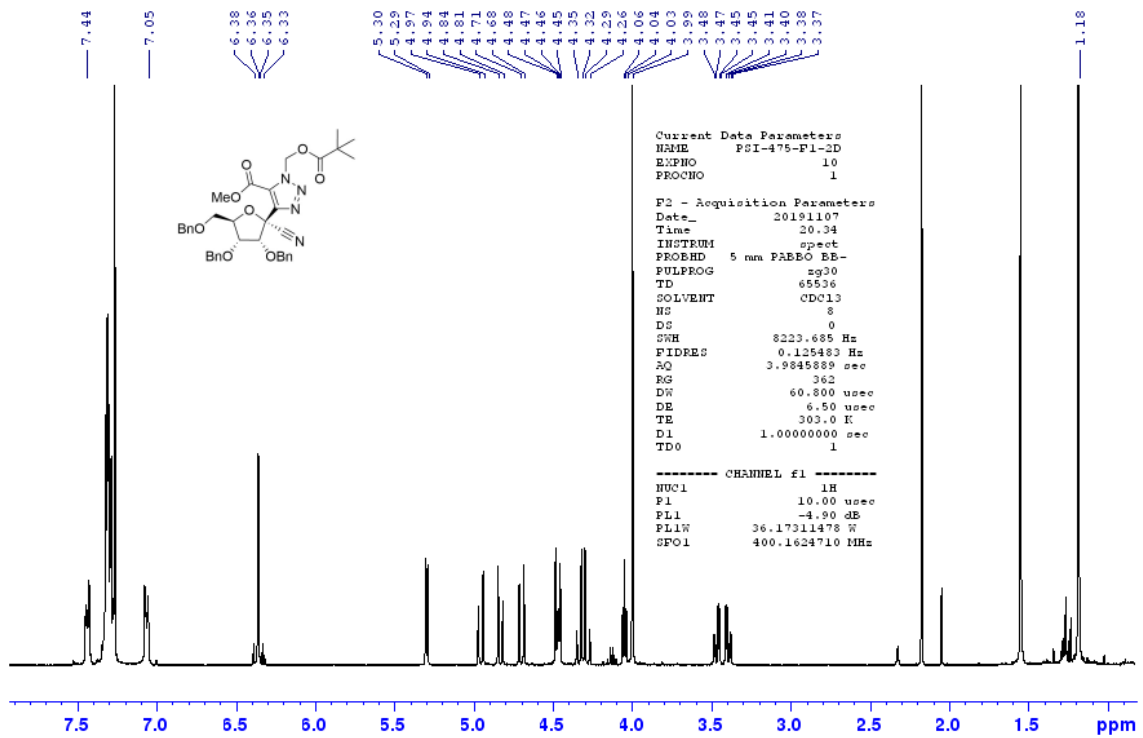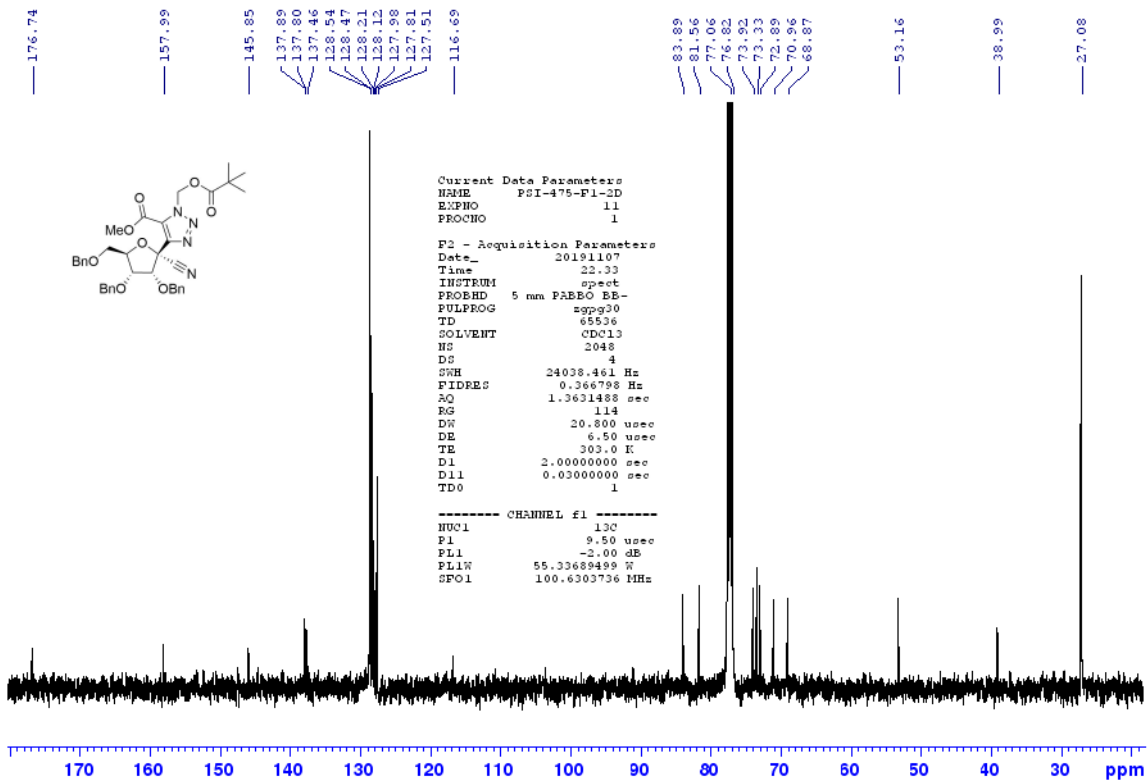

<sup>1</sup>H, <sup>13</sup>C NMR and NOESY spectra of compound (13a)

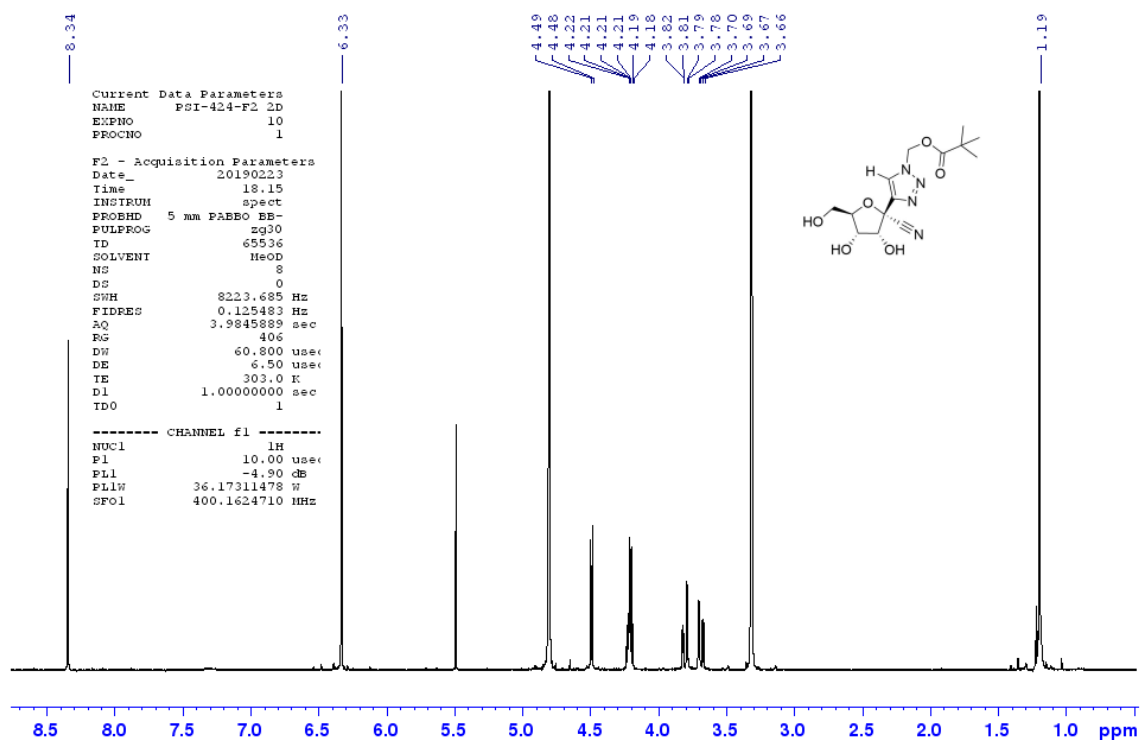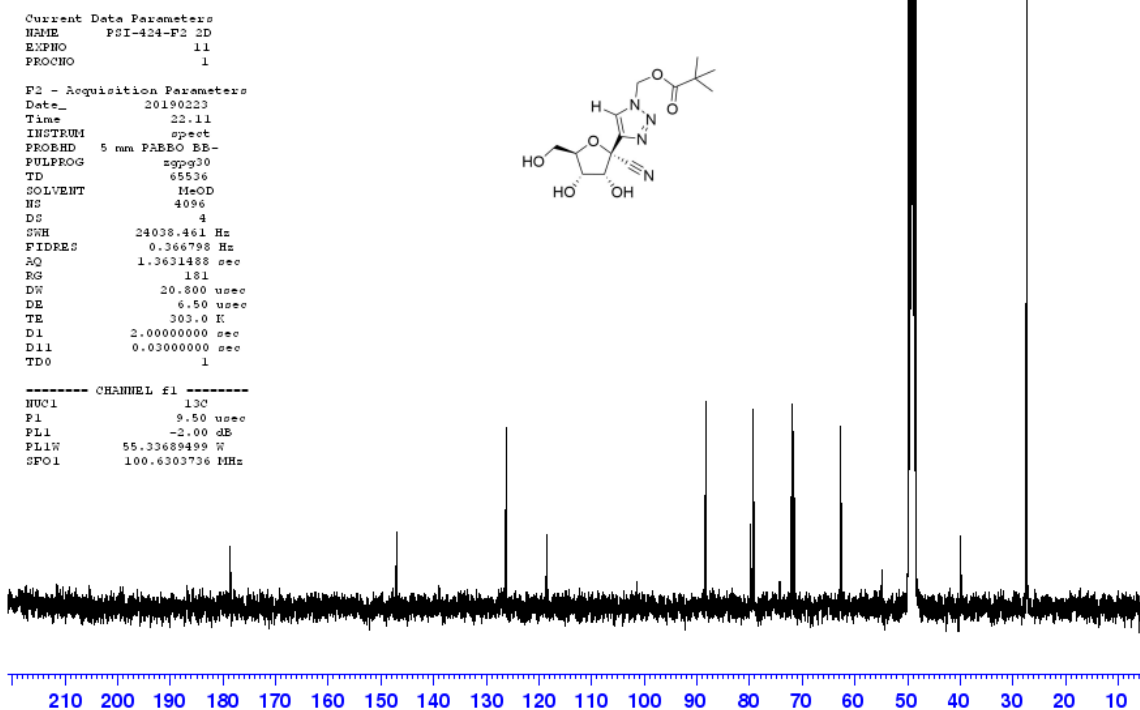

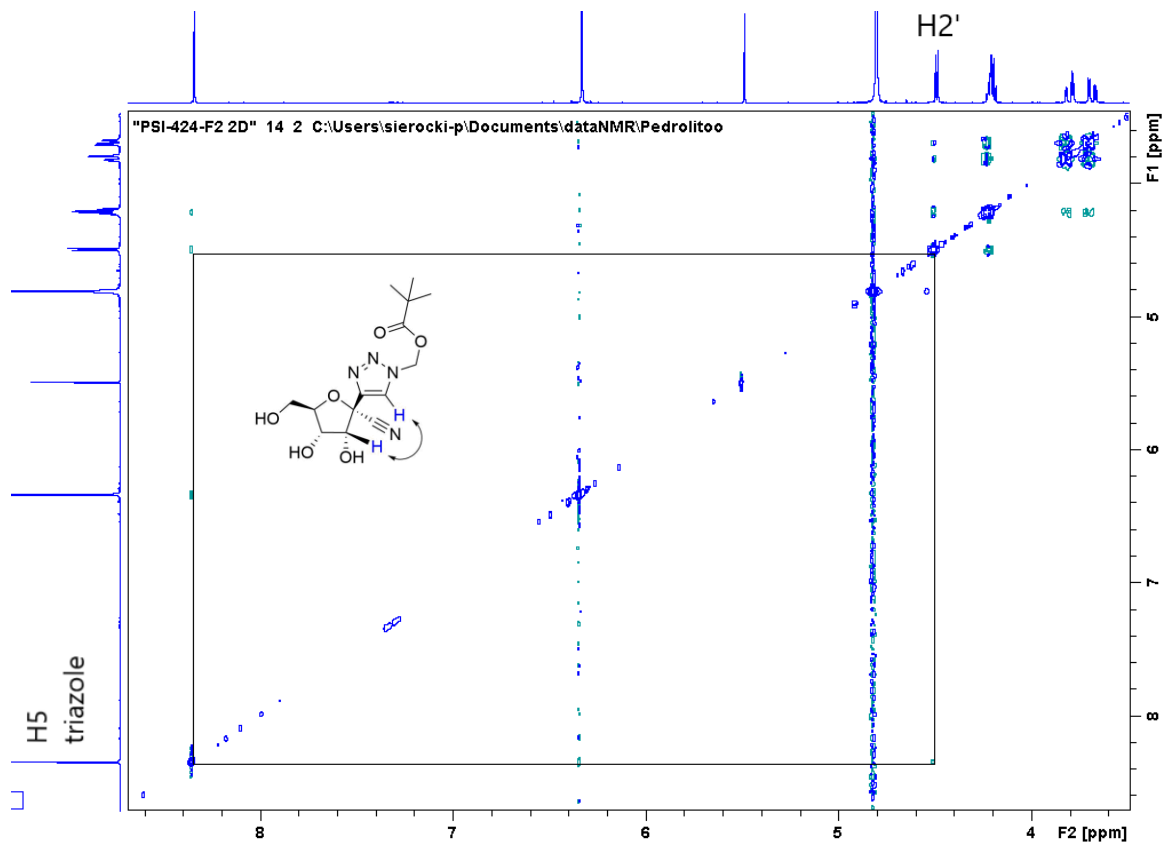

<sup>1</sup>H and <sup>13</sup>C NMR spectra of compound (13b)

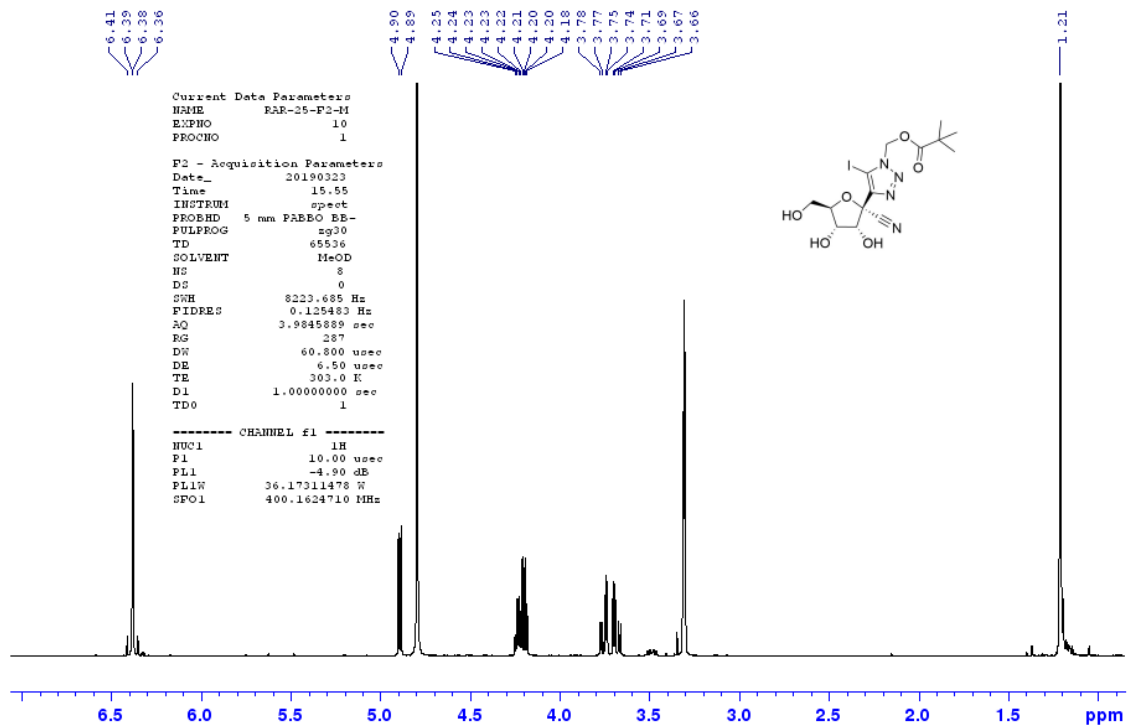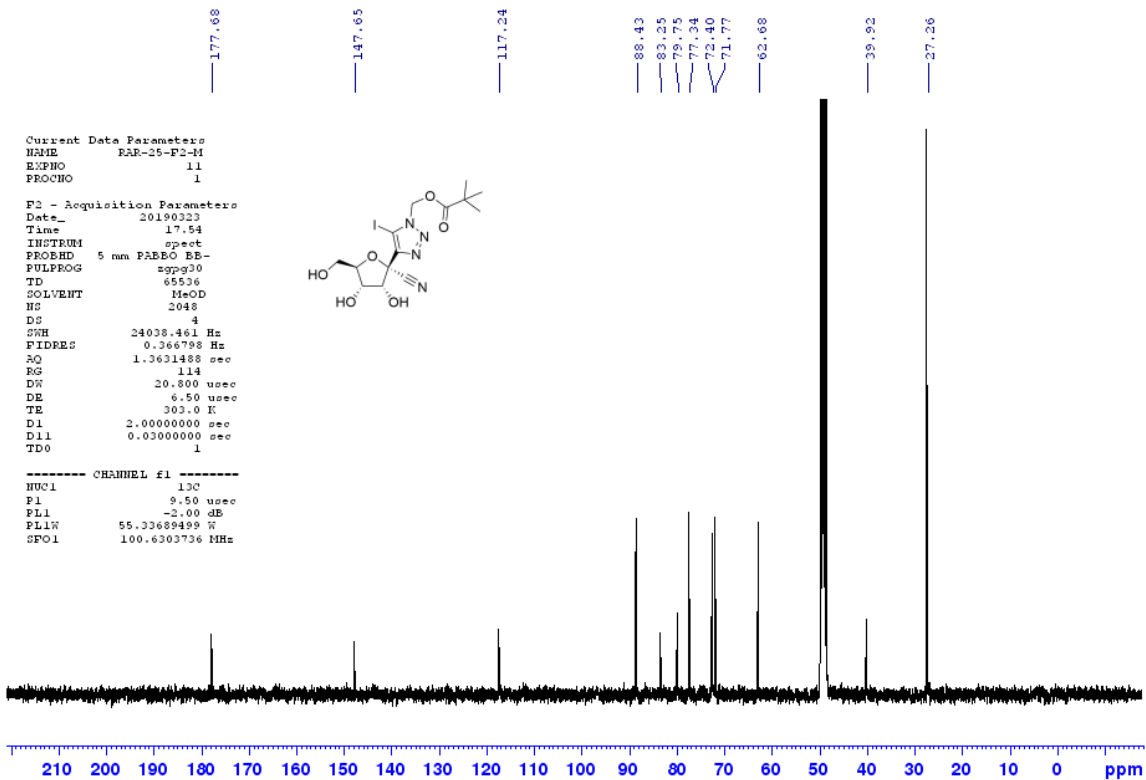

# <sup>1</sup>H and <sup>13</sup>C NMR spectra of compound (13c)

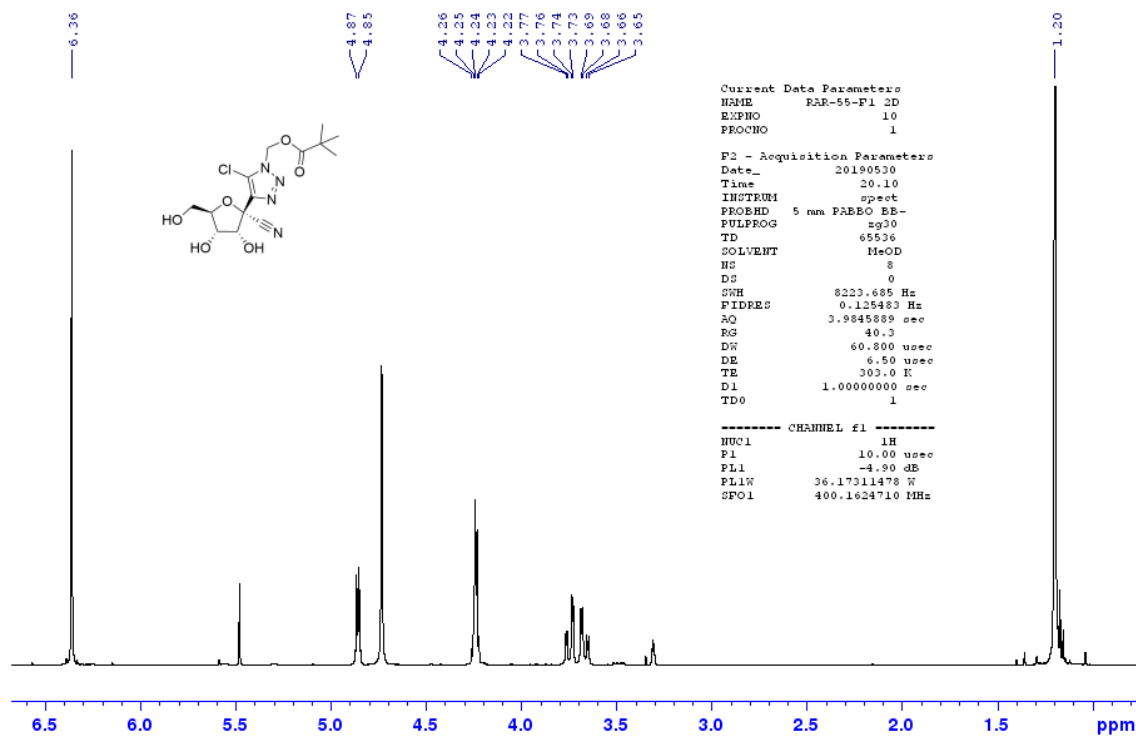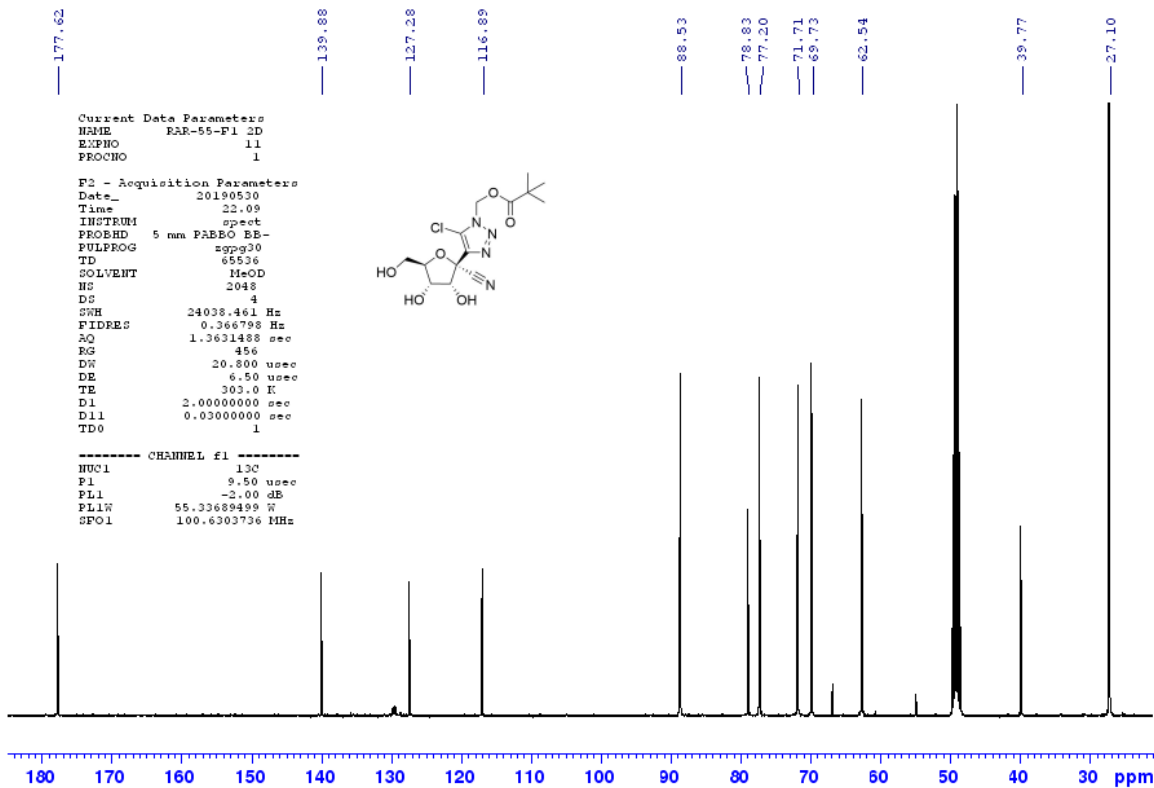

<sup>1</sup>H, <sup>19</sup>F and <sup>13</sup>C NMR spectra of compound (13d)

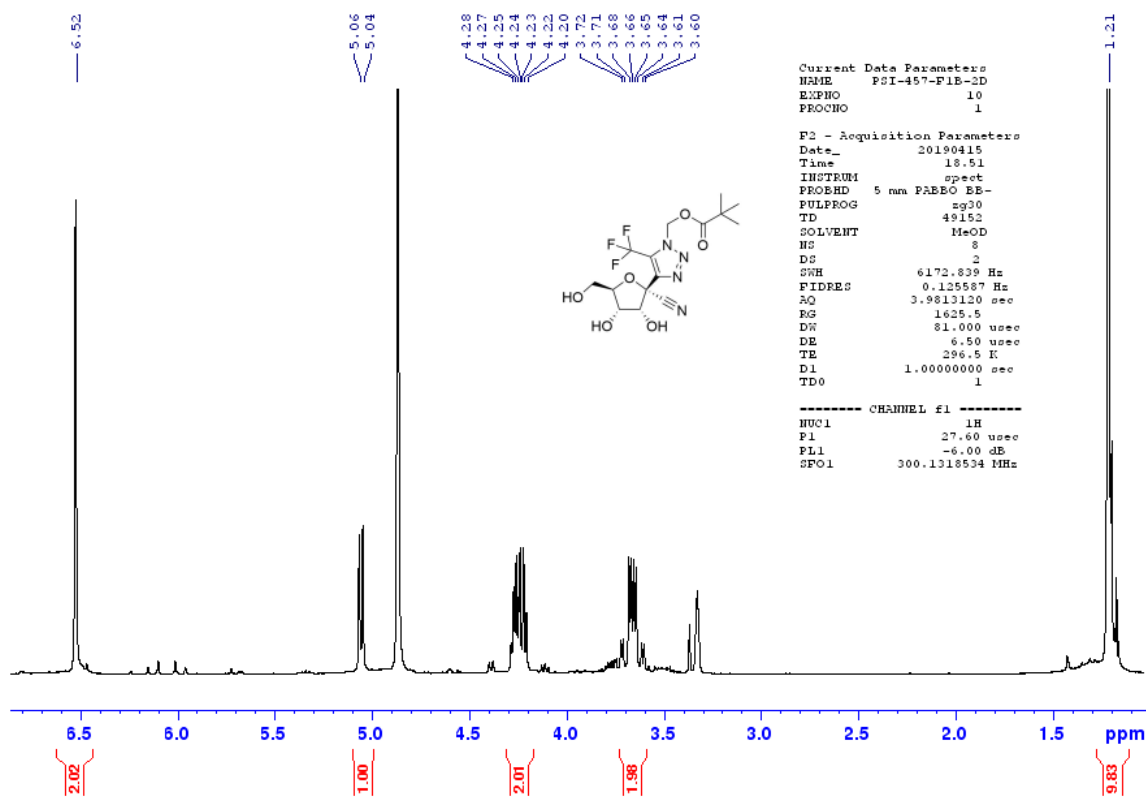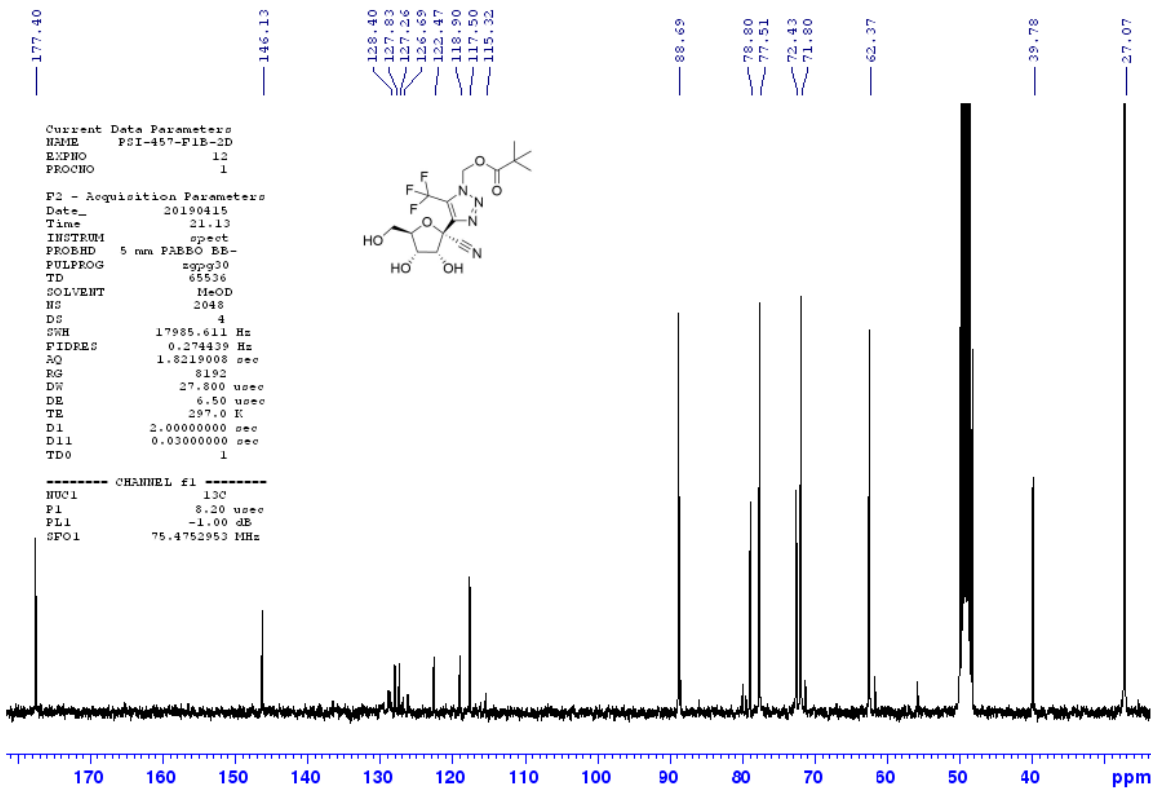

```

Current Data Parameters
NAME      PSI-457-F1E-2D
EXPNO    11
PROCNO   1

F2 - Acquisition Parameters
Date_    20190415
Time     18.58
INSTRUM  spect
PROBHD   5 mm PABBO BB-
PULPROG  zgpg30q
TD       131072
SOLVENT  MeOD
NS       16
DS       4
SWH      67567.570 Hz
FIDRES   0.515500 Hz
AQ       0.9699328 sec
RG       181
DN       7.400 usec
DE       6.50 usec
TE       296.6 K
D1       10.00000000 sec
D11      0.03000000 sec
D12      0.00002000 sec
TD0      1

----- CHANNEL f1 -----
NUC1     19F
P1       14.50 usec
PL1      3.50 dB
SFO1     282.3761148 MHz

```

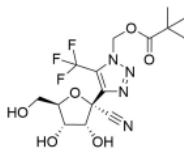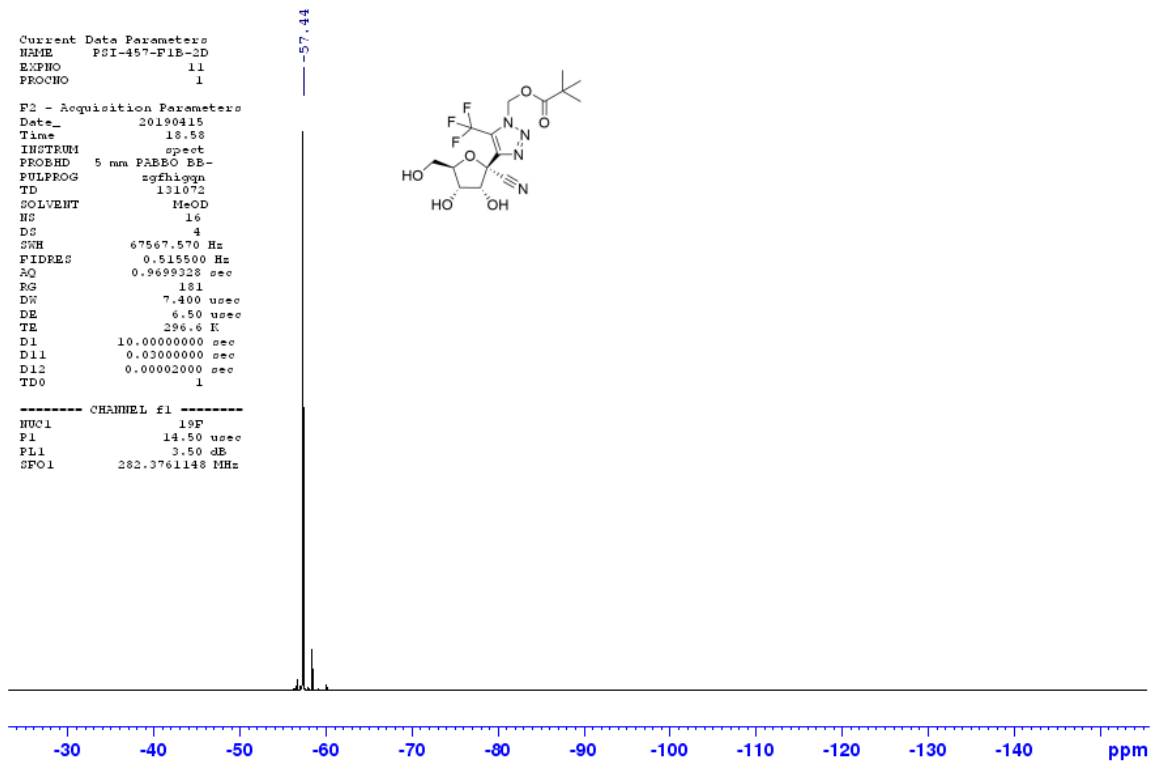

# <sup>1</sup>H and <sup>13</sup>C NMR spectra of compound (13e)

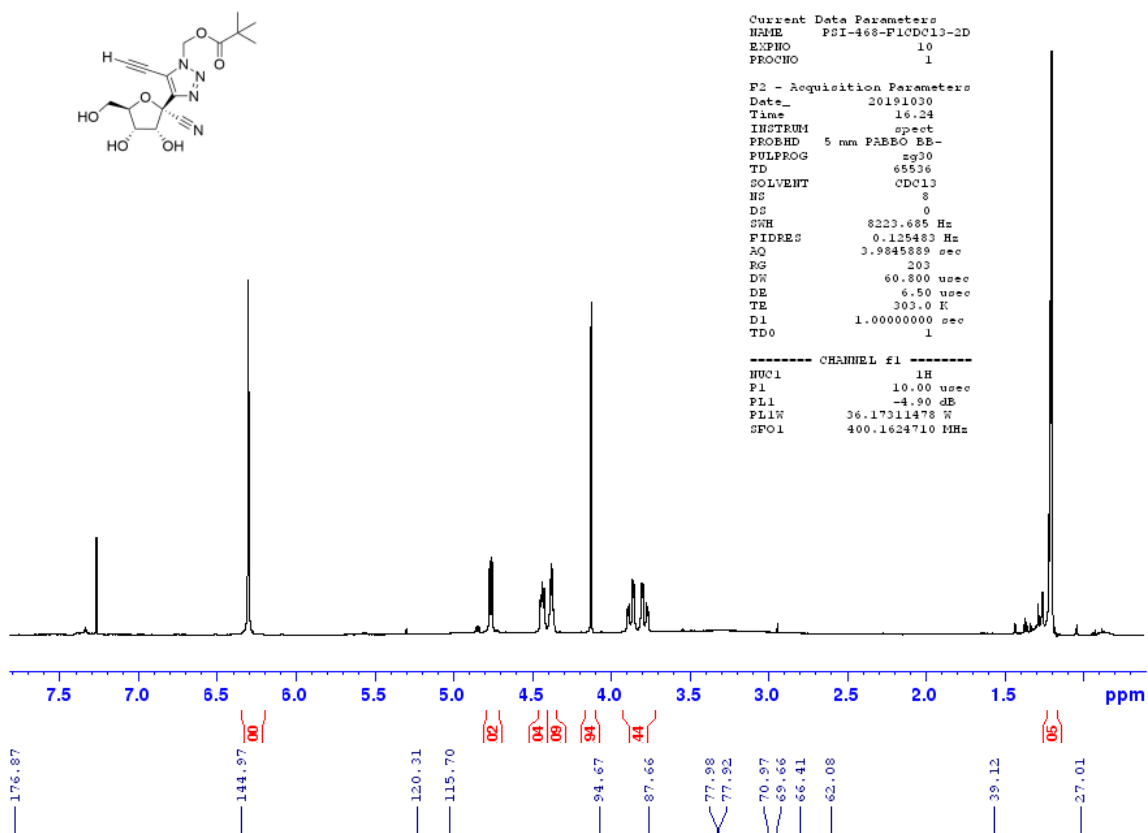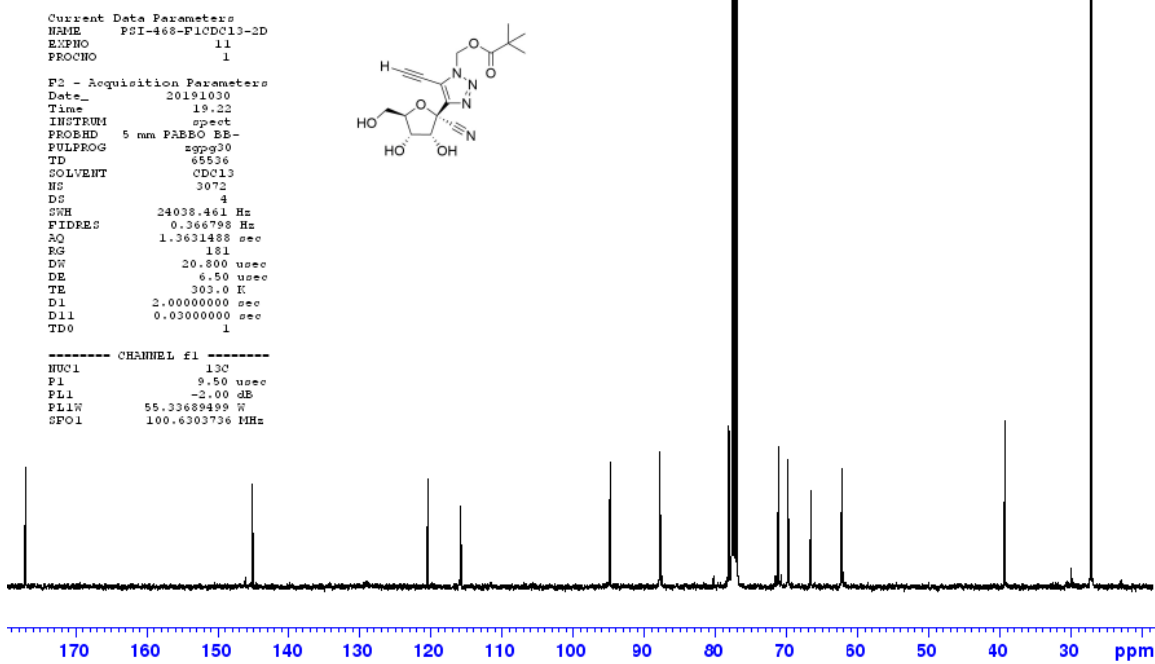



# <sup>1</sup>H and <sup>13</sup>C NMR spectra of compound (13f)

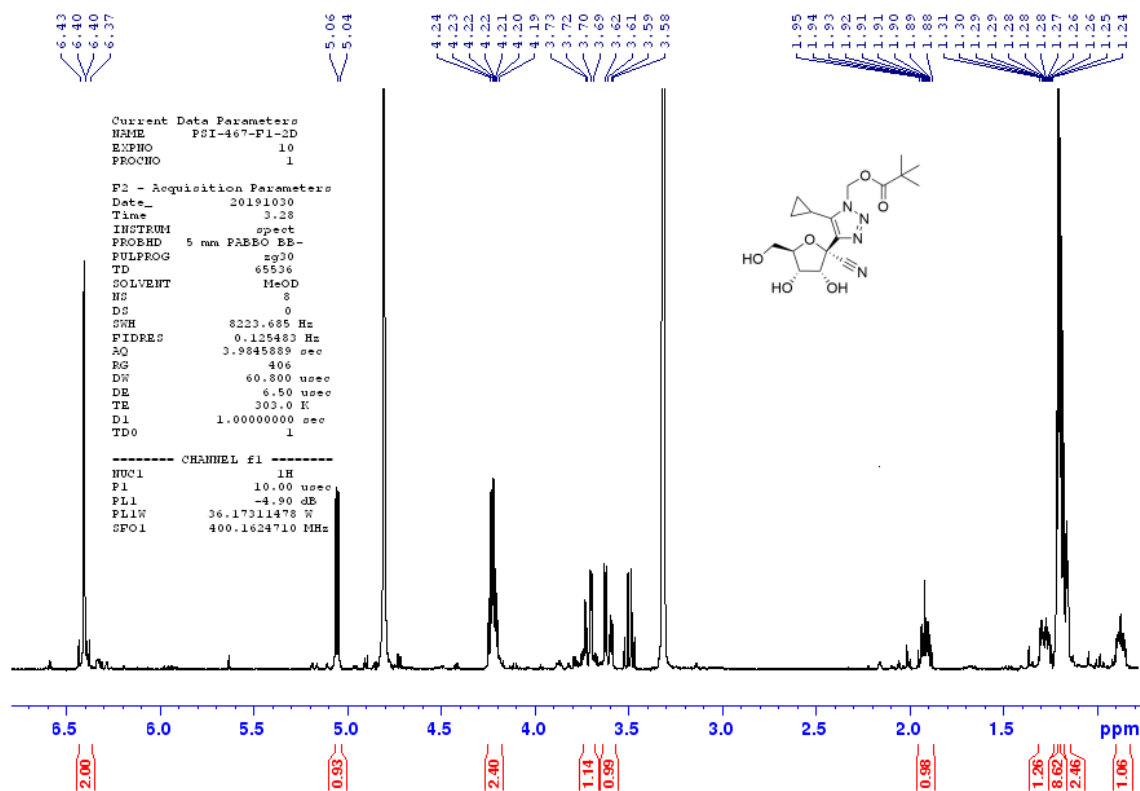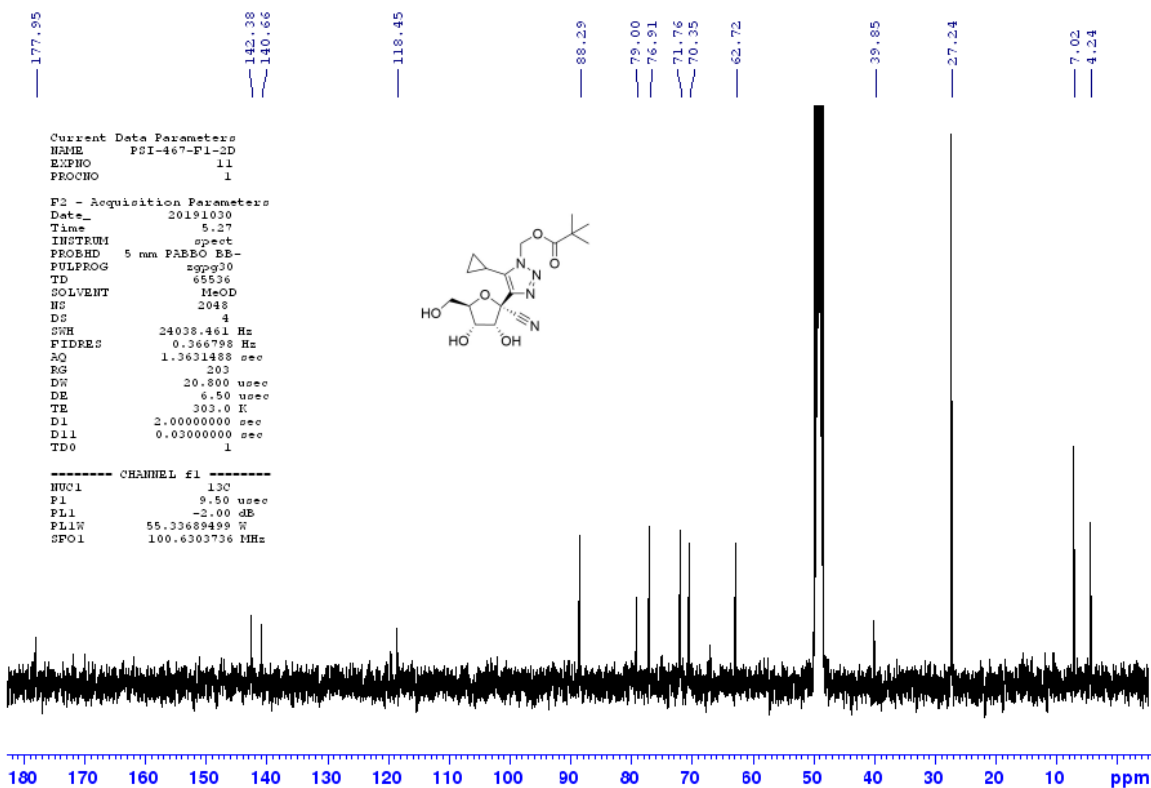

# <sup>1</sup>H and <sup>13</sup>C NMR spectra of compound (13g)

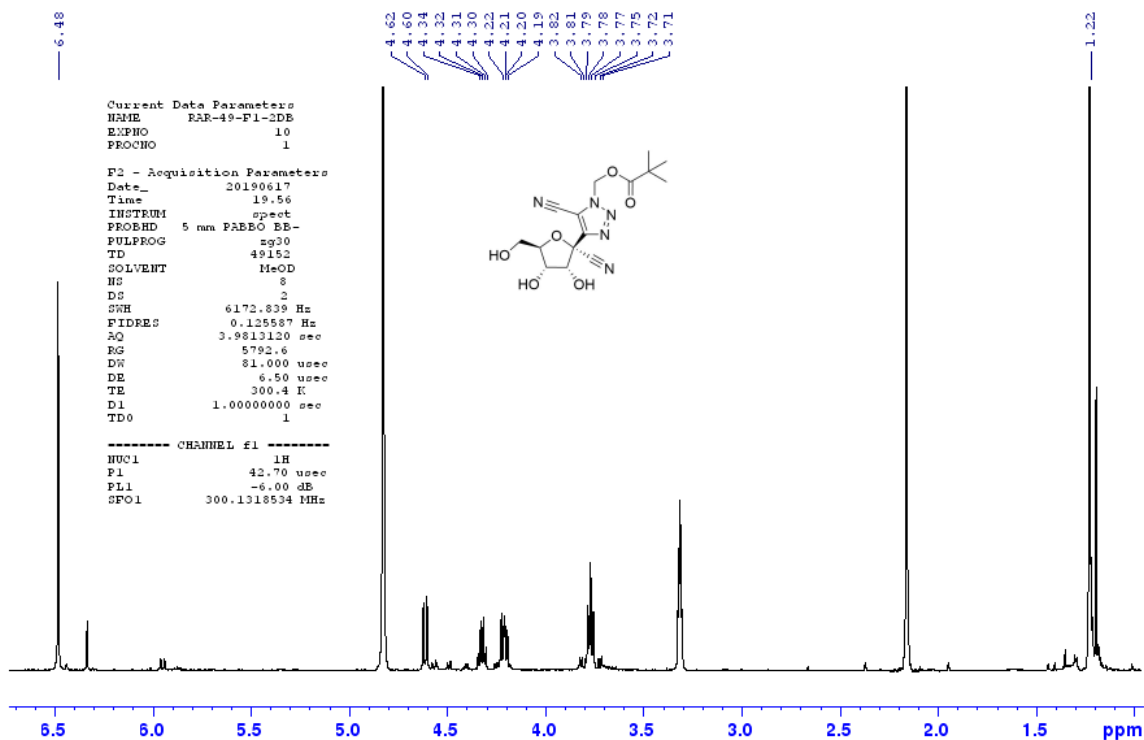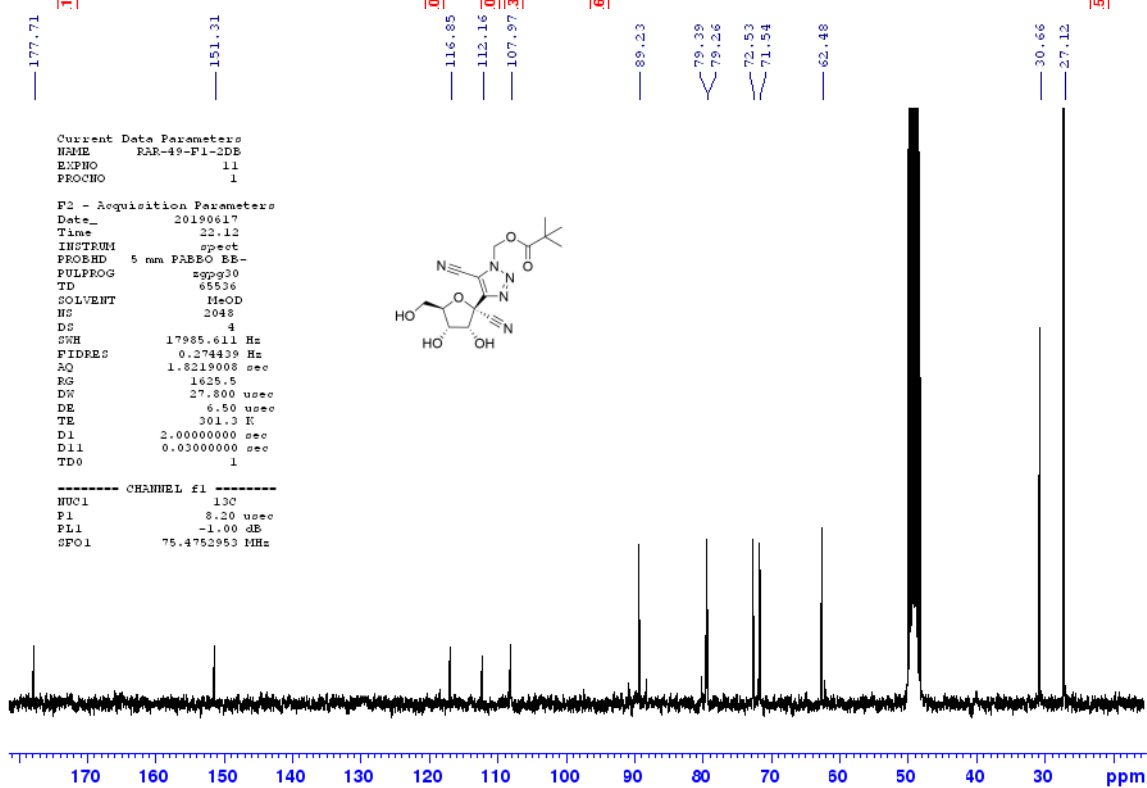

**<sup>1</sup>H and <sup>13</sup>C NMR spectra of compound (13h)**

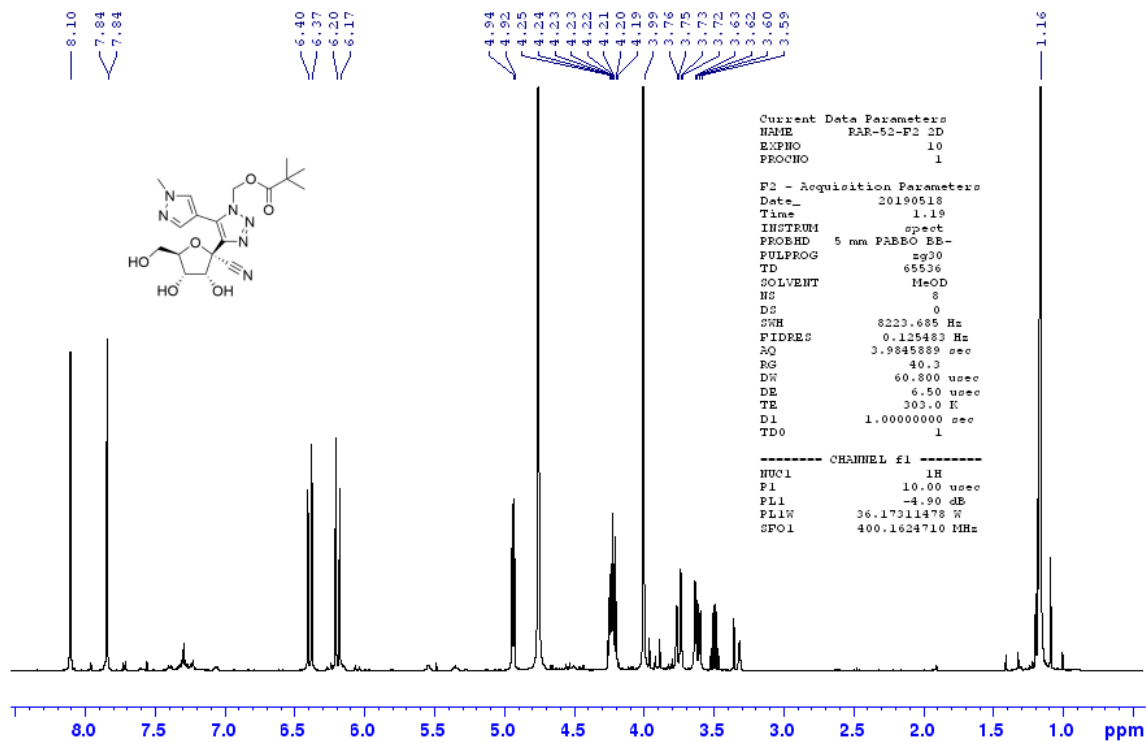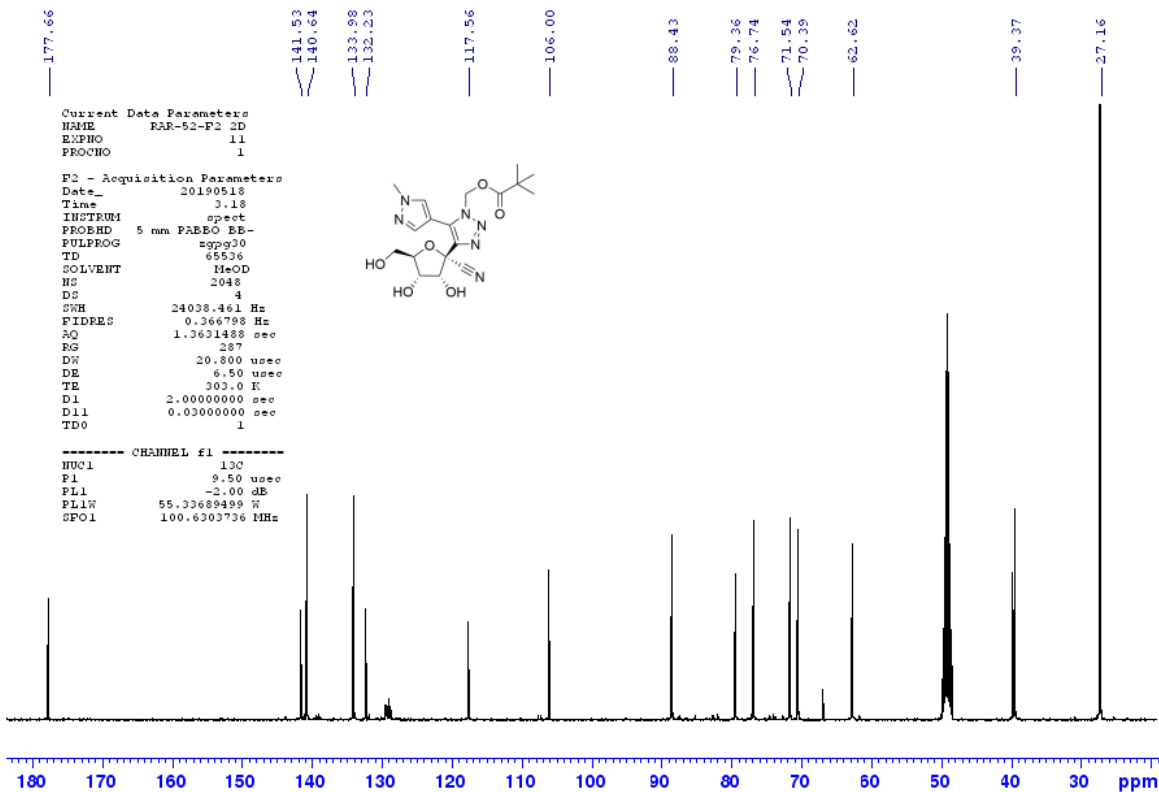

# <sup>1</sup>H and <sup>13</sup>C NMR spectra of compound (13i)

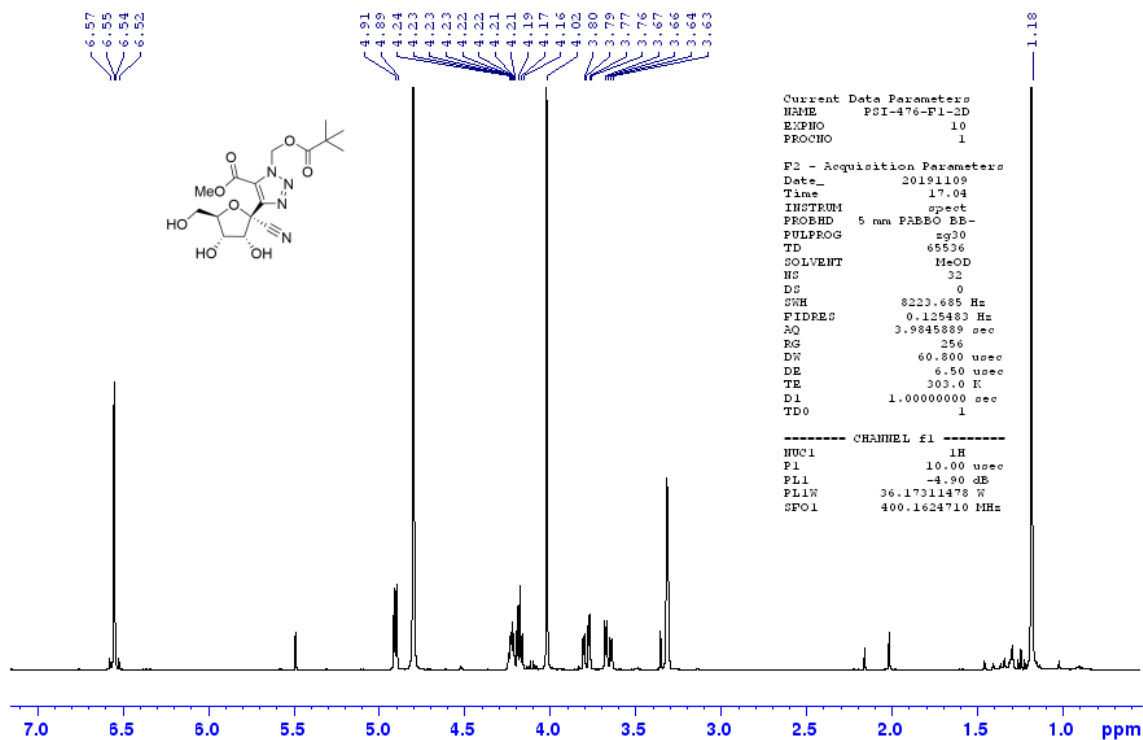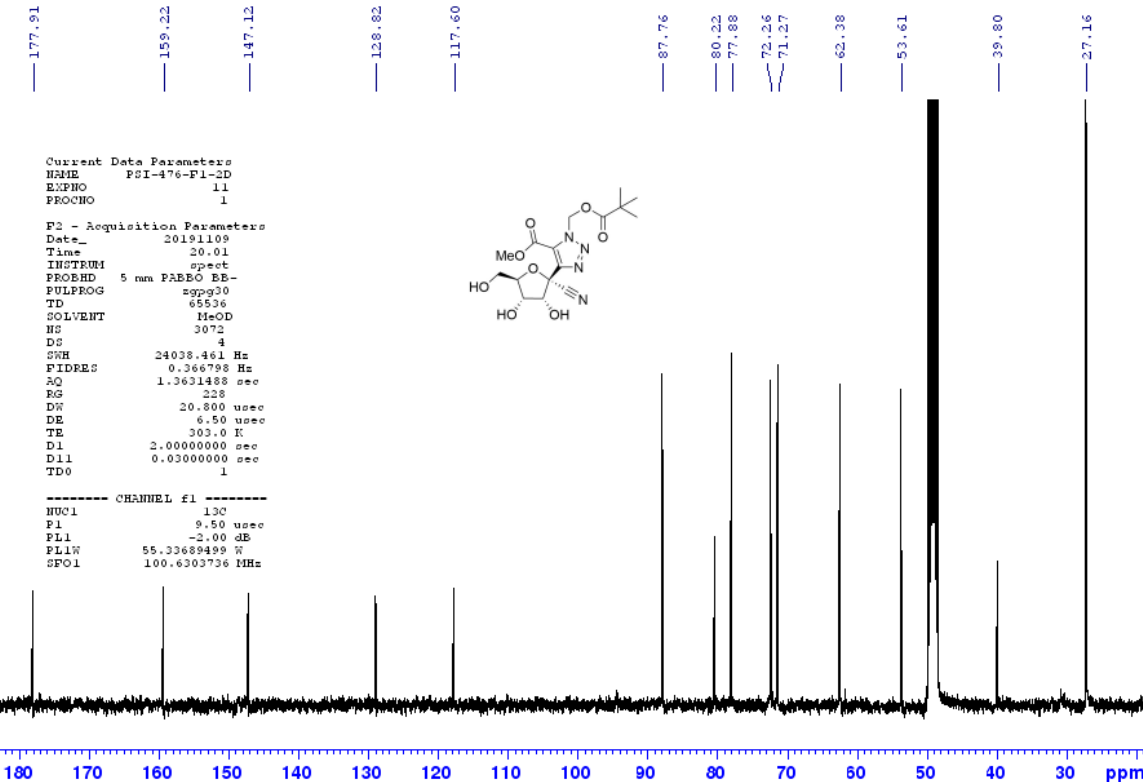

# <sup>1</sup>H and <sup>13</sup>C NMR spectra of compound (5a)

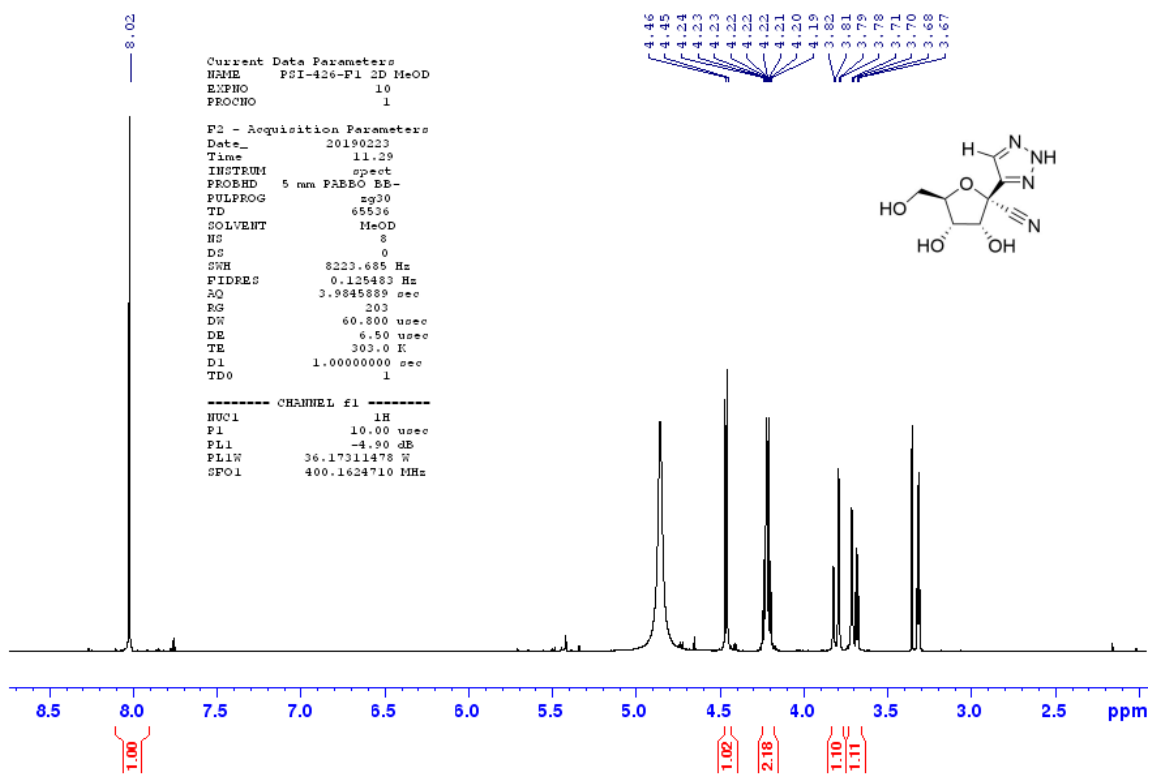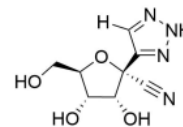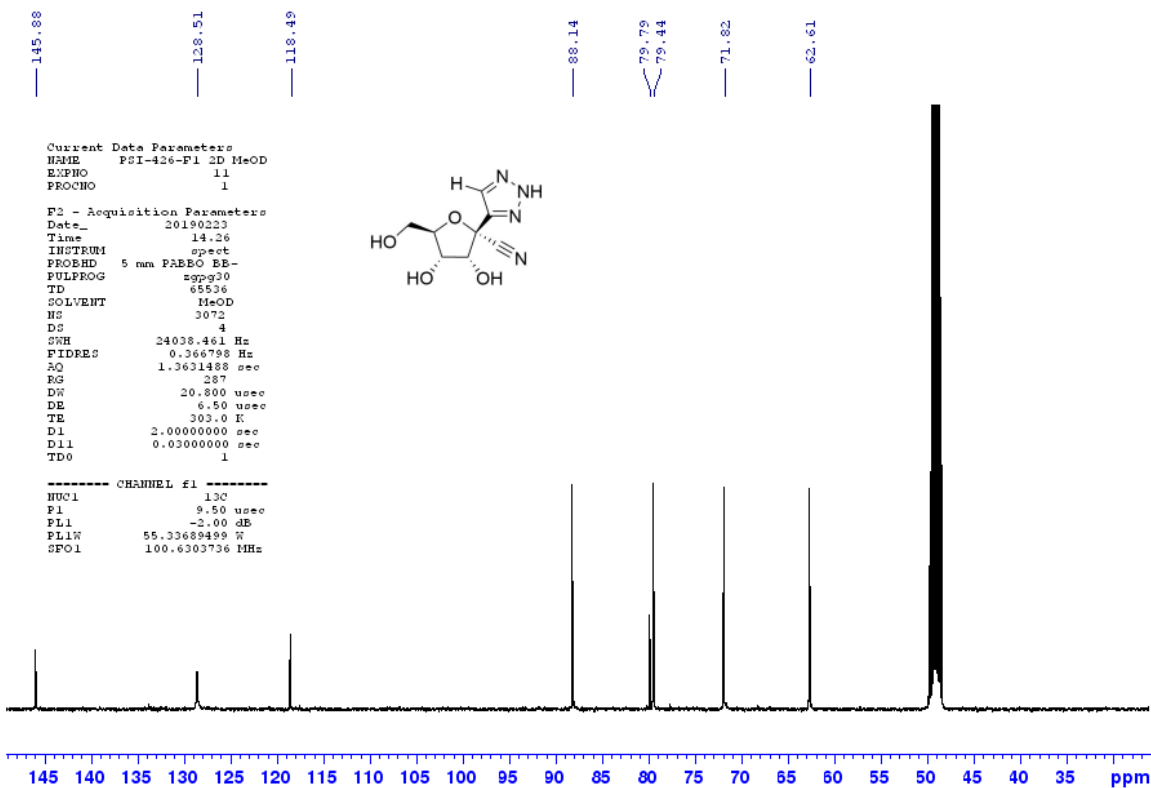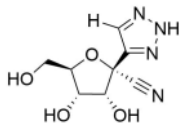

**<sup>1</sup>H and <sup>13</sup>C NMR spectra of compound (5b)**

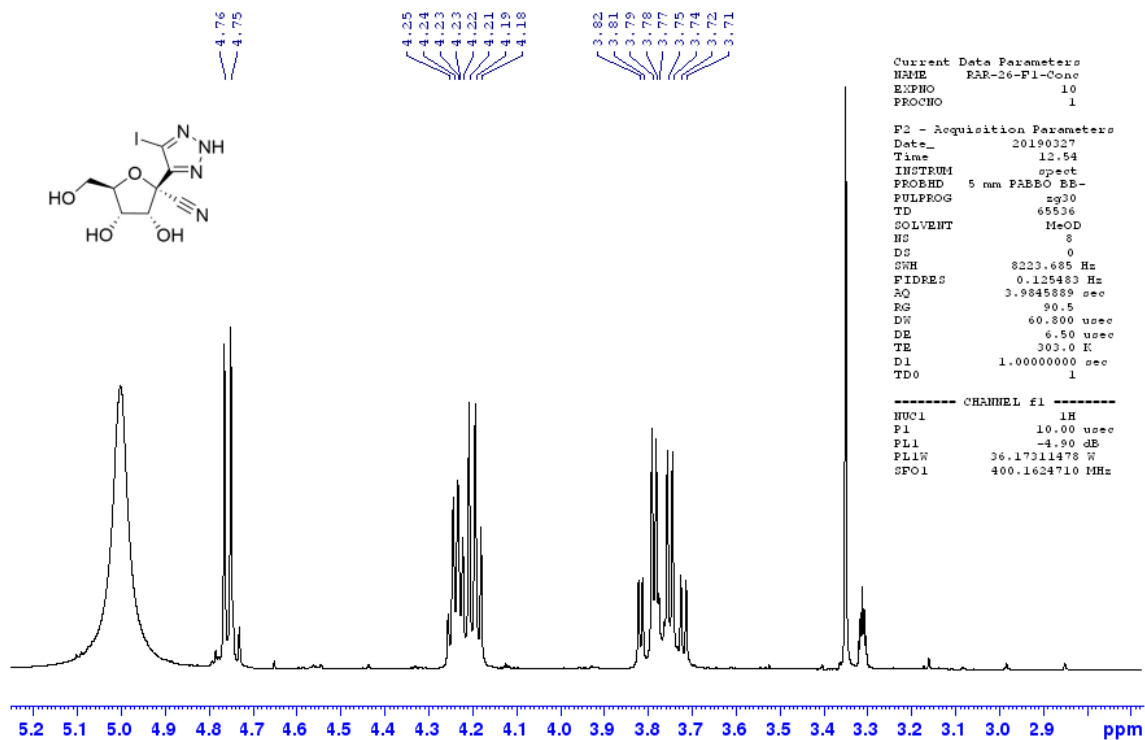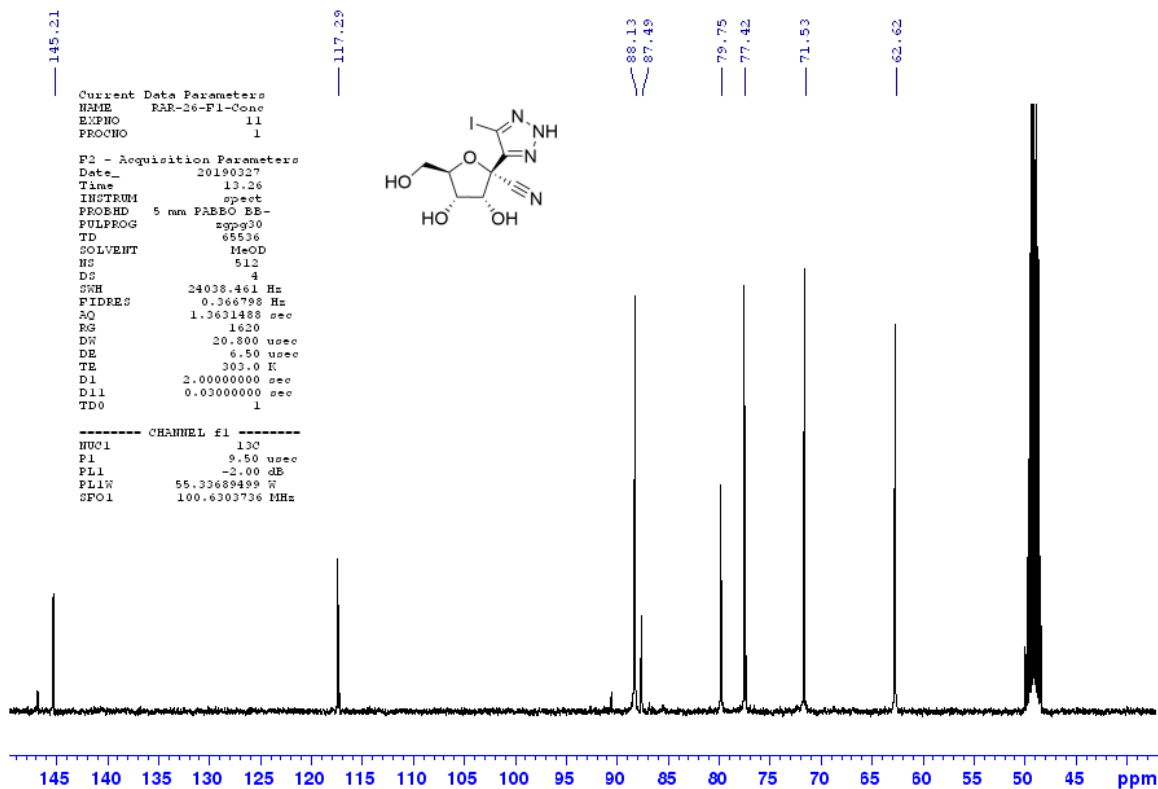

# <sup>1</sup>H and <sup>13</sup>C NMR spectra of compound (5c)

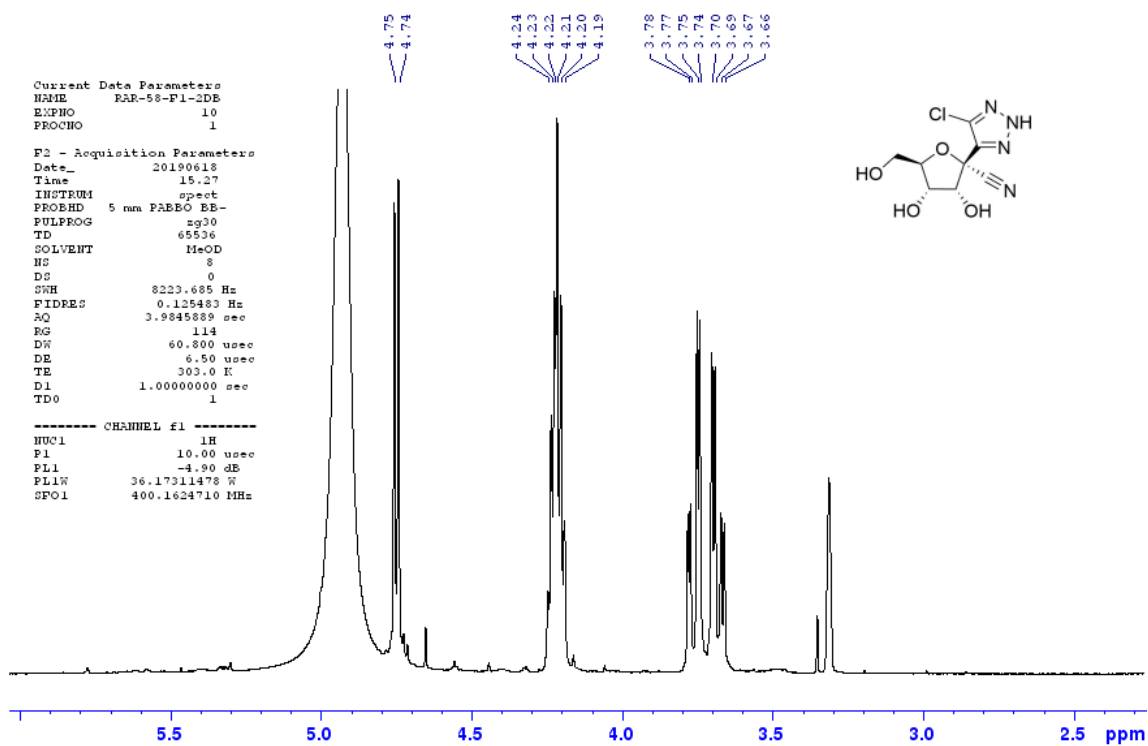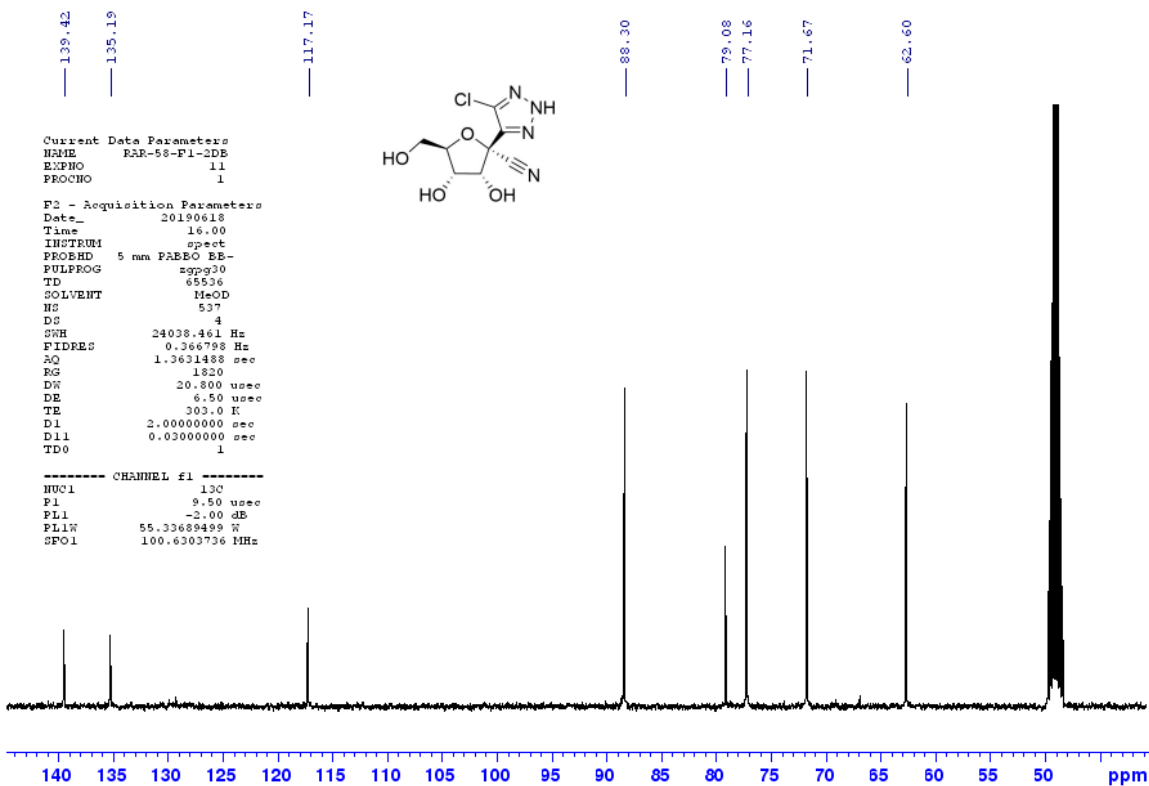

<sup>1</sup>H, <sup>19</sup>F and <sup>13</sup>C NMR spectra of compound (5d)

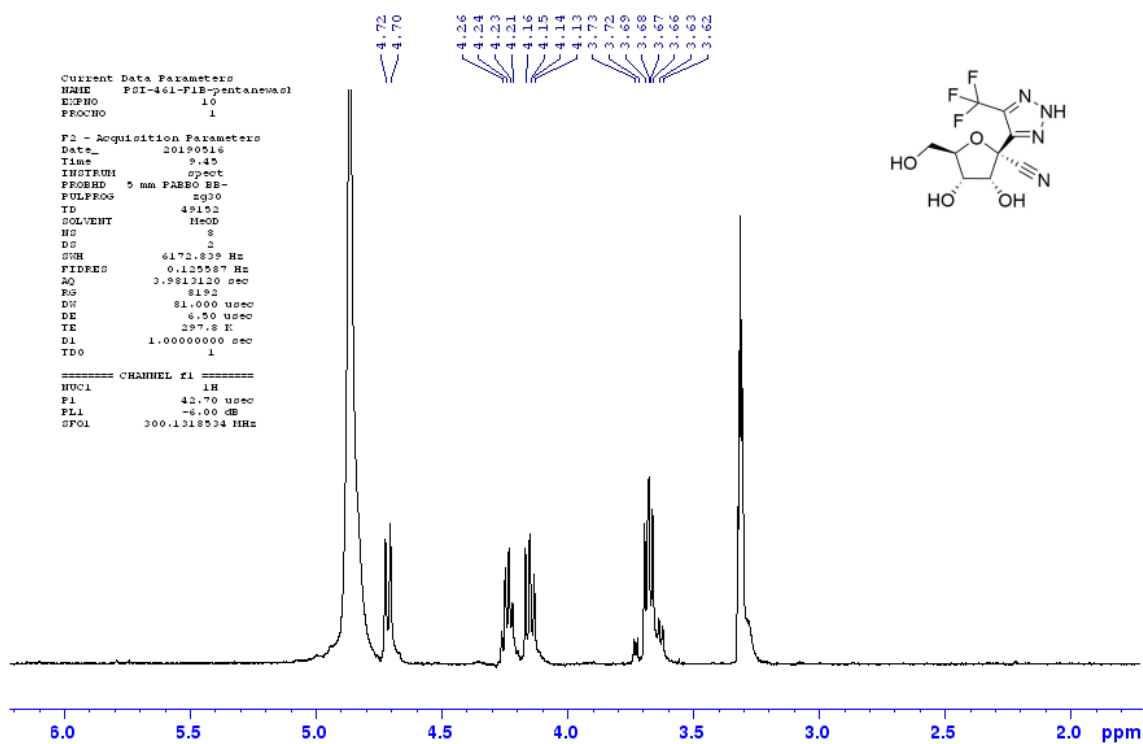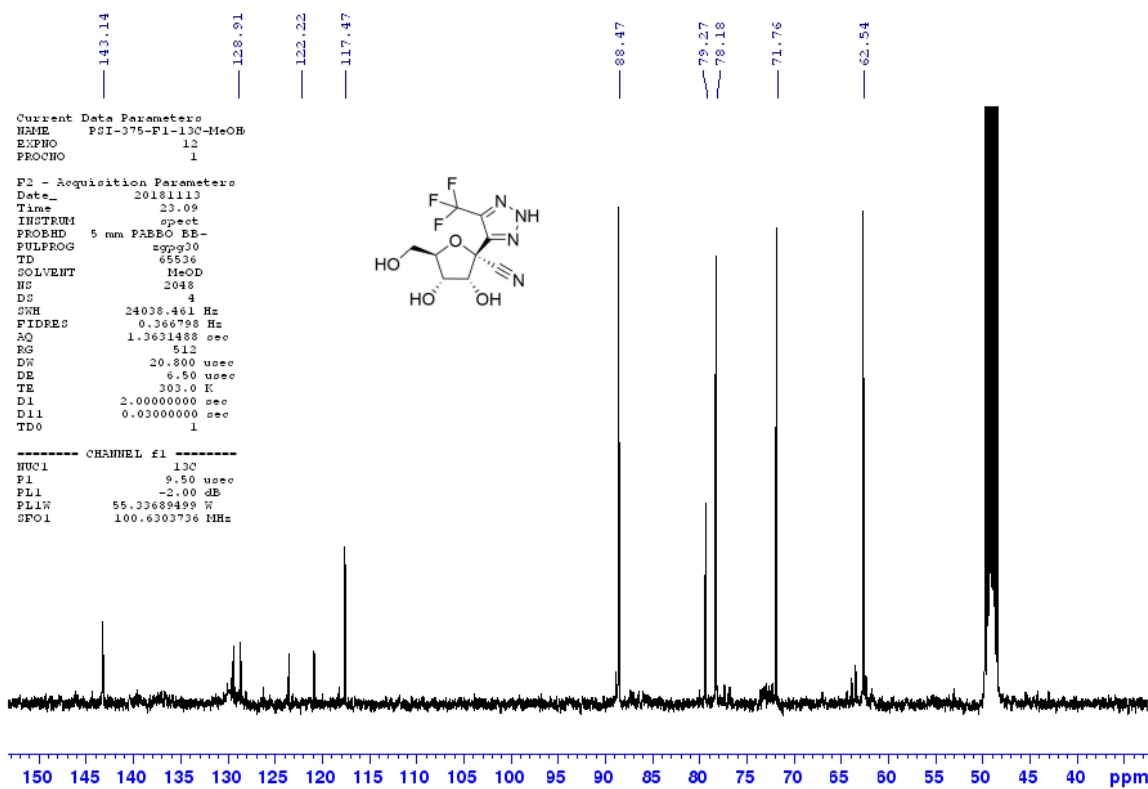



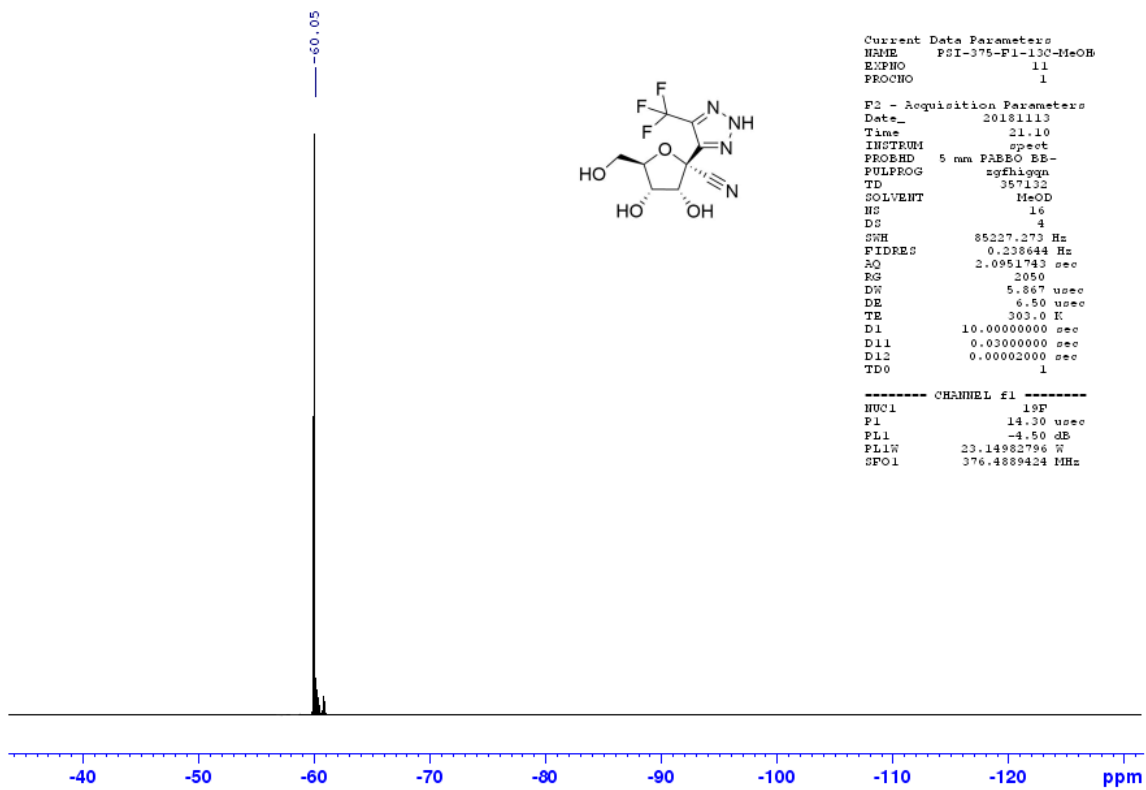

<sup>1</sup>H and <sup>13</sup>C NMR spectra of compound (5e)

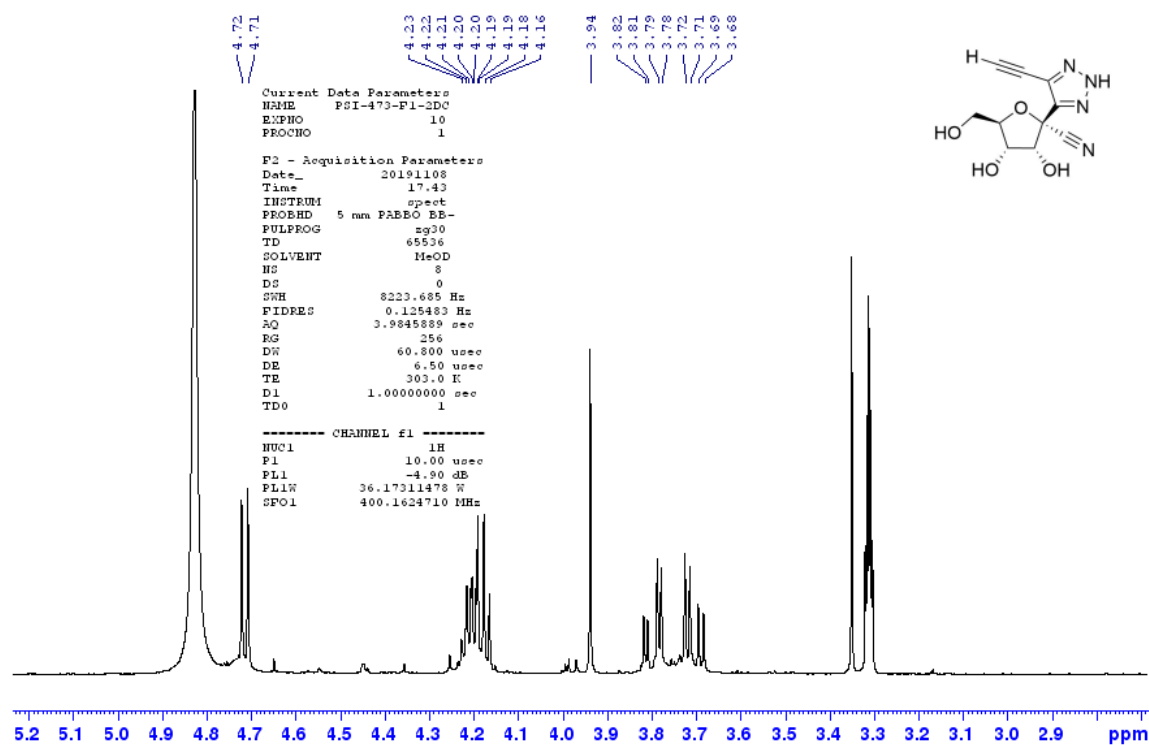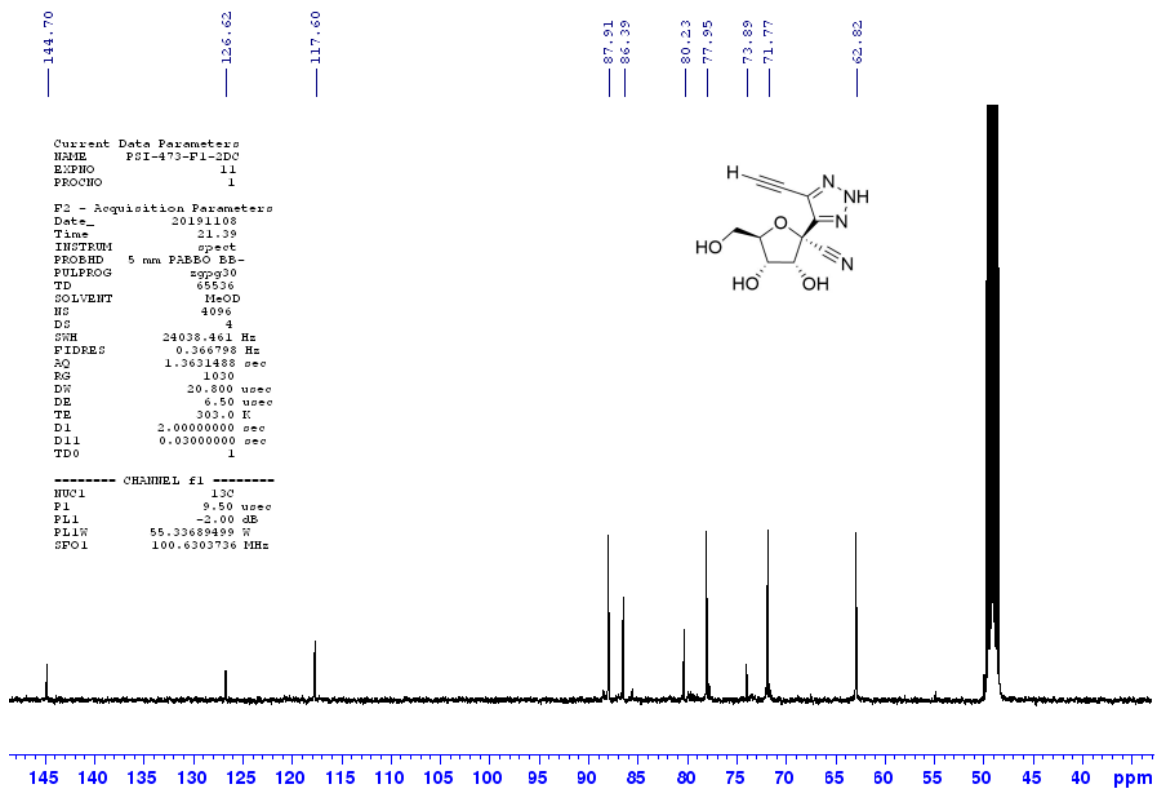

<sup>1</sup>H and <sup>13</sup>C NMR spectra of compound (5f)

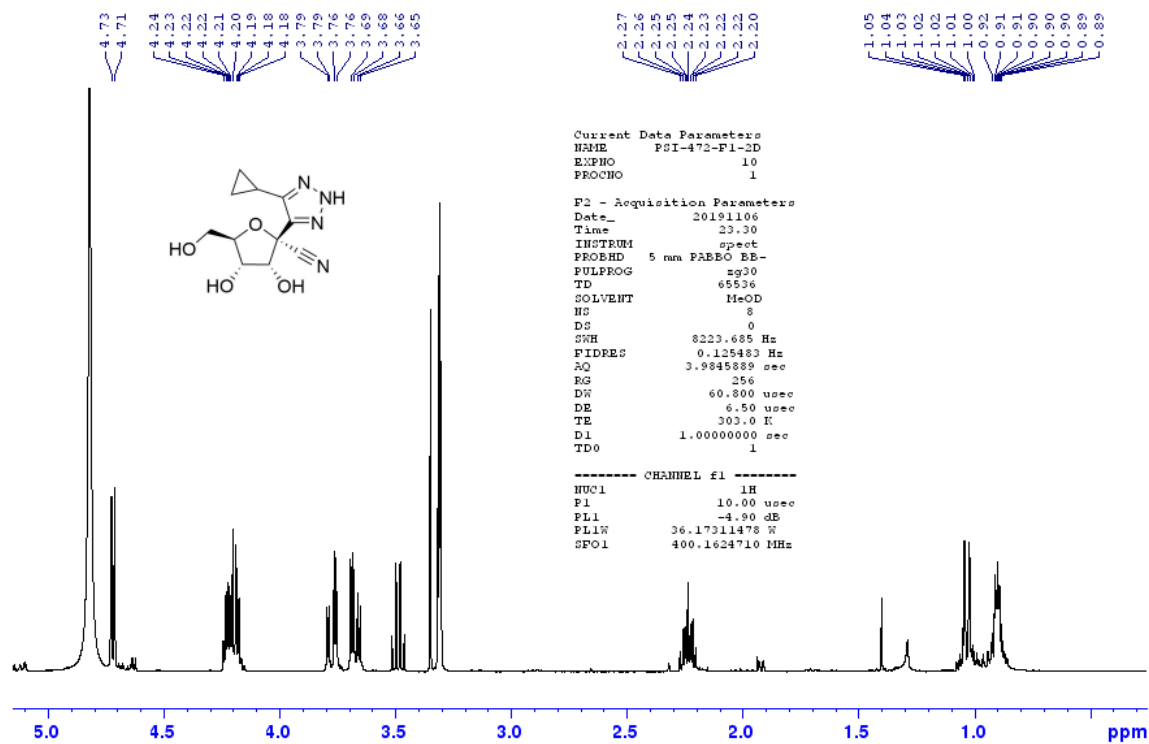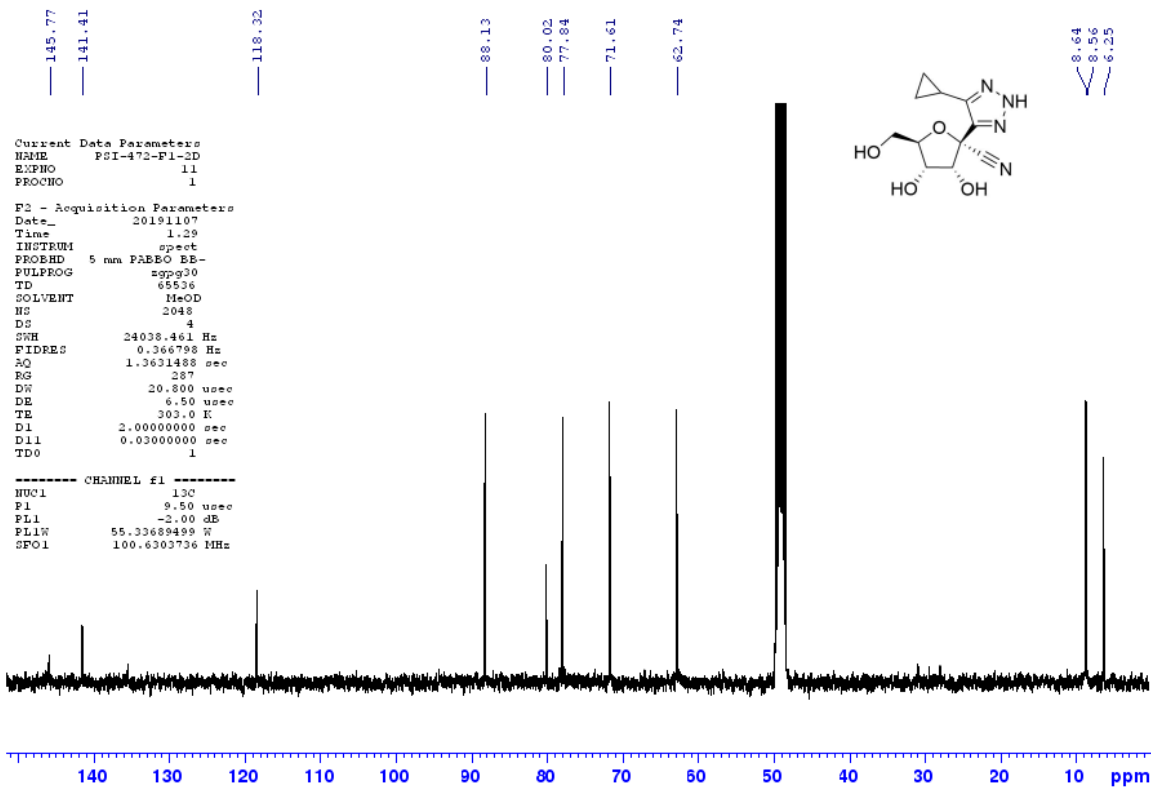

# <sup>1</sup>H and <sup>13</sup>C NMR spectra of compound (5g)

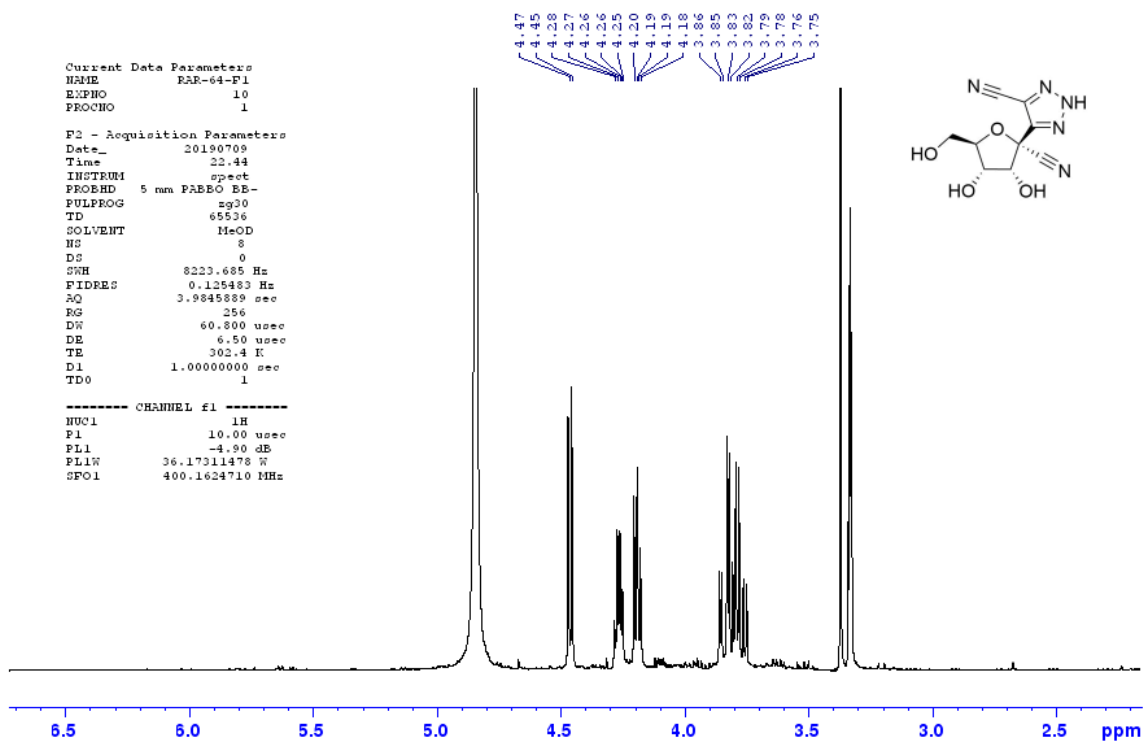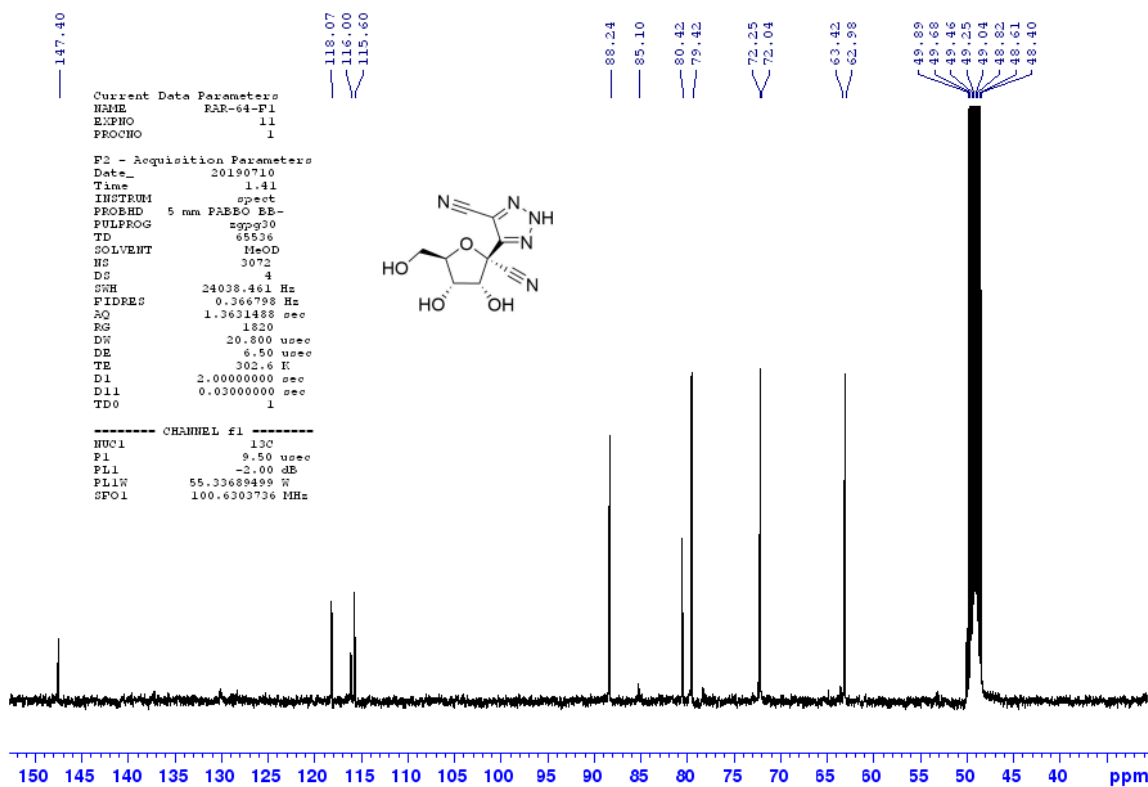

# <sup>1</sup>H and <sup>13</sup>C NMR spectra of compound (5h)

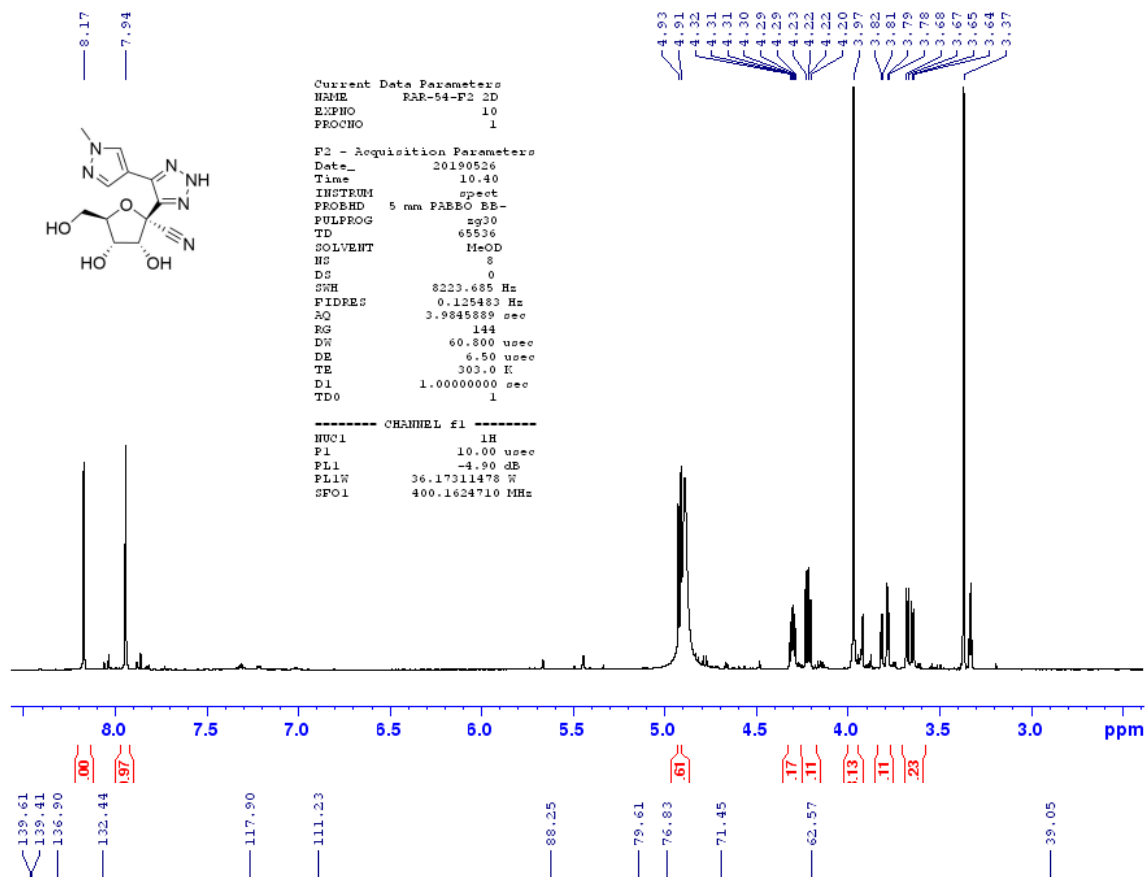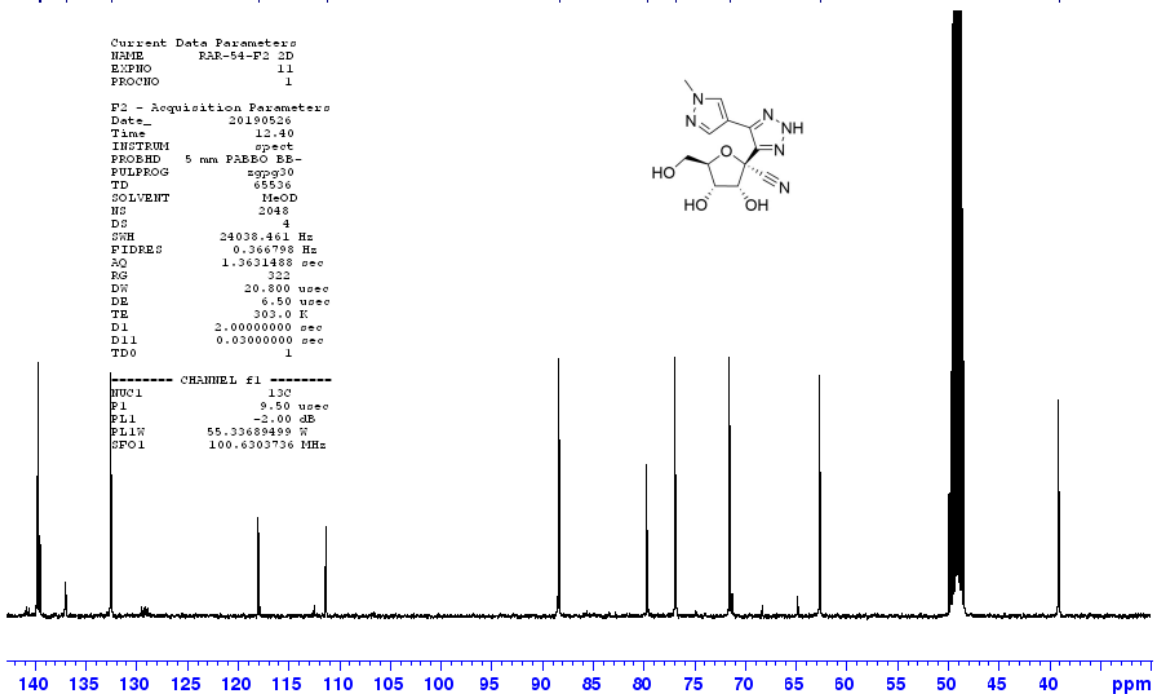

# <sup>1</sup>H and <sup>13</sup>C NMR spectra of compound (5i)

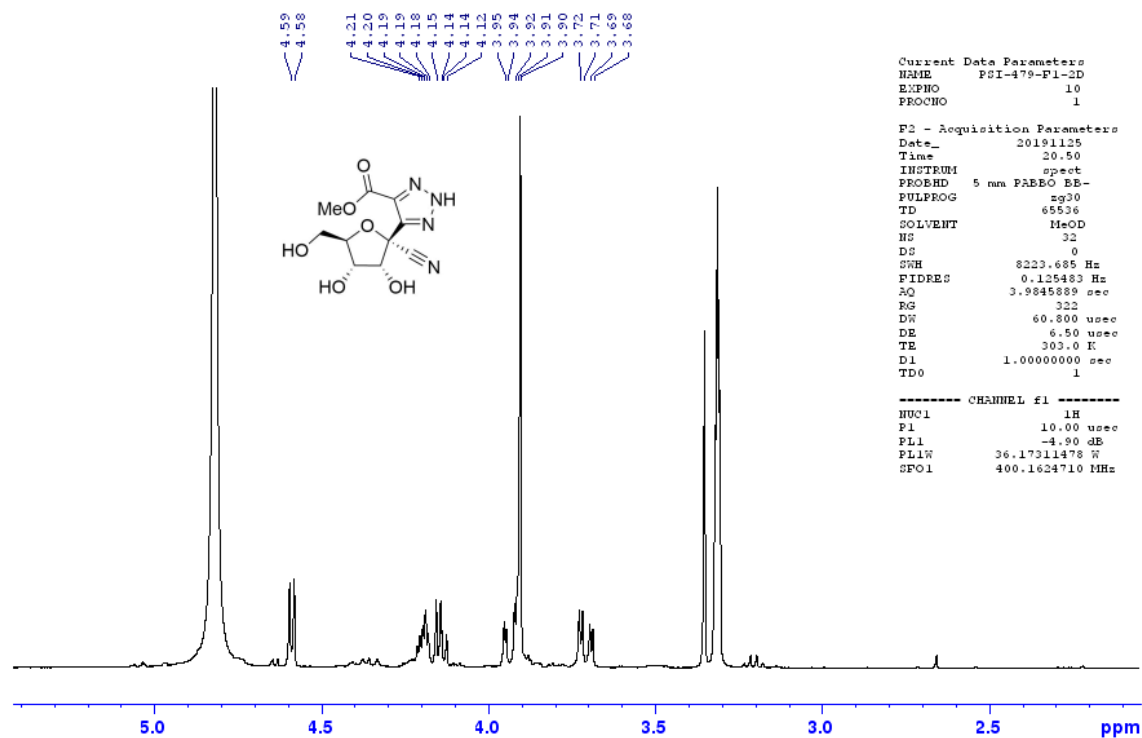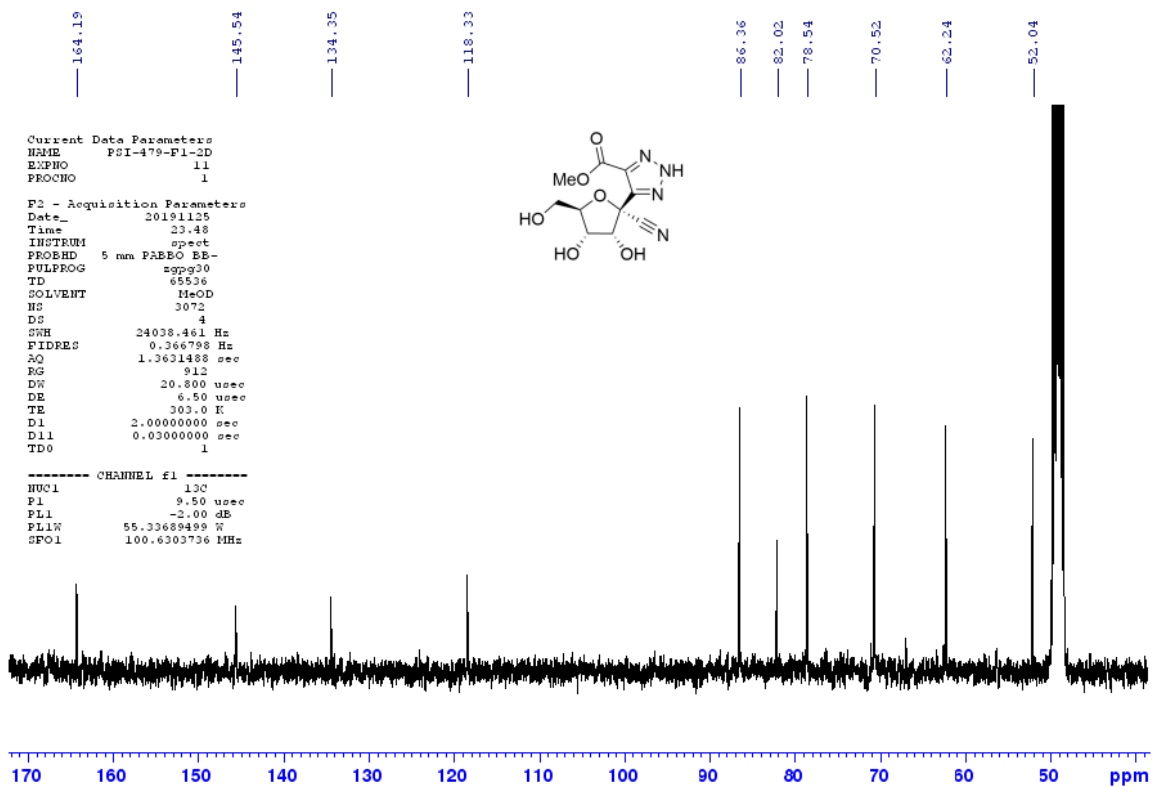

Supplement: d1ob02451e1.pdf [file d1ob02451e1.pdf]
